# Supplementary material
Source: publisher figshare collection journal article supplement (https://karger.figshare.com/articles/dataset/_/28777952)
Supplement: Supplementary file 1 [file 1]

## Sheet: IRI2vsCon
Differentially expressed renal proteins of control and IRI groups in mice
Protein accession	Protein description	Gene name	IRI2/Con Ratio	IRI2/Con P value	Regulated Type	MW [kDa]	Coverage [%]	Peptides	Unique peptides	Con_2	Con_3	Con_546	IRI28_11	IRI28_2	IRI28_4	IRI28_5	IRI28_8	IRI2_11	IRI2_12	IRI2_13	IRI2_14	IRI2_15	Subcellular localization	KEGG KO No.	KEGG Gene	KEGG pathway	Biological Process	Cellular Component	Molecular Function	Pfam ID	Domain description	KOG category	KOG NO.	KOG description
O08692	Neutrophilic granule protein OS=Mus musculus OX=10090 GN=Ngp PE=1 SV=1	Ngp	29.1186	4.77035e-10	Up	19.331	44.3	8	8	0.082218	0.079685	0.094039	0.05768	0.064053	0.056192	0.072166	0.07286	2.50433	2.66511	2.48747	2.42167	2.34252	extracellular				GO:0009892 negative regulation of metabolic process; GO:0010466 negative regulation of peptidase activity; GO:0010605 negative regulation of macromolecule metabolic process; GO:0010951 negative regulation of endopeptidase activity; GO:0016525 negative regulation of angiogenesis; GO:0019222 regulation of metabolic process; GO:0022603 regulation of anatomical structure morphogenesis; GO:0030162 reg…	GO:0005576 extracellular region; GO:0005615 extracellular space; GO:0005622 intracellular; GO:0005623 cell; GO:0005737 cytoplasm; GO:0031410 cytoplasmic vesicle; GO:0031982 vesicle; GO:0043226 organelle; GO:0043227 membrane-bounded organelle; GO:0043229 intracellular organelle; GO:0097708 intracellular vesicle;	GO:0004857 enzyme inhibitor activity; GO:0004866 endopeptidase inhibitor activity; GO:0004869 cysteine-type endopeptidase inhibitor activity; GO:0030234 enzyme regulator activity; GO:0030414 peptidase inhibitor activity; GO:0061134 peptidase regulator activity; GO:0061135 endopeptidase regulator activity; GO:0098772 molecular function regulator;	PF00666	Cathelicidin
O08691	Arginase-2, mitochondrial OS=Mus musculus OX=10090 GN=Arg2 PE=1 SV=1	Arg2	28.8681	4.6963e-07	Up	38.878	59	12	12	0.110647	0.061621	0.087038	0.038232	0.097279	0.0337	0.046014	0.049349	2.08363	2.52495	2.41901	3.0499	2.39862	mitochondria	K01476	E3.5.3.1; arginase [EC:3.5.3.1]	mmu01230 Biosynthesis of amino acids; mmu00330 Arginine and proline metabolism; mmu01100 Metabolic pathways; mmu00220 Arginine biosynthesis; mmu05146 Amoebiasis	GO:0000003 reproduction; GO:0000050 urea cycle; GO:0001101 response to acid chemical; GO:0001505 regulation of neurotransmitter levels; GO:0001655 urogenital system development; GO:0001657 ureteric bud development; GO:0001666 response to hypoxia; GO:0001817 regulation of cytokine production; GO:0001818 negative regulation of cytokine production; GO:0001822 kidney development; GO:0001823 mesonephr…	GO:0005622 intracellular; GO:0005623 cell; GO:0005737 cytoplasm; GO:0005739 mitochondrion; GO:0005759 mitochondrial matrix; GO:0031974 membrane-enclosed lumen; GO:0043226 organelle; GO:0043227 membrane-bounded organelle; GO:0043229 intracellular organelle; GO:0043231 intracellular membrane-bounded organelle; GO:0043233 organelle lumen; GO:0070013 intracellular organelle lumen;	GO:0003824 catalytic activity; GO:0004053 arginase activity; GO:0005488 binding; GO:0005515 protein binding; GO:0016787 hydrolase activity; GO:0016810 hydrolase activity, acting on carbon-nitrogen (but not peptide) bonds; GO:0016813 hydrolase activity, acting on carbon-nitrogen (but not peptide) bonds, in linear amidines; GO:0019899 enzyme binding; GO:0050998 nitric-oxide synthase binding;	PF00491	Arginase family	E	KOG2965	Arginase
E9Q414	Apolipoprotein B-100 OS=Mus musculus OX=10090 GN=Apob PE=1 SV=1	Apob	21.2463	2.73309e-05	Up	509.43	8	22	22	0.104033	0.102983	0.115649	0.069416	0.059077	0.0334		0.089723	2.48218	1.47772	1.59594	4.19663	1.67324	extracellular	K14462	APOB; apolipoprotein B	mmu04979 Cholesterol metabolism; mmu04977 Vitamin digestion and absorption; mmu04975 Fat digestion and absorption	GO:0000003 reproduction; GO:0001101 response to acid chemical; GO:0001523 retinoid metabolic process; GO:0001568 blood vessel development; GO:0001701 in utero embryonic development; GO:0001944 vasculature development; GO:0002218 activation of innate immune response; GO:0002221 pattern recognition receptor signaling pathway; GO:0002224 toll-like receptor signaling pathway; GO:0002237 response to m…	GO:0000323 lytic vacuole; GO:0005576 extracellular region; GO:0005615 extracellular space; GO:0005622 intracellular; GO:0005623 cell; GO:0005737 cytoplasm; GO:0005764 lysosome; GO:0005768 endosome; GO:0005769 early endosome; GO:0005773 vacuole; GO:0005775 vacuolar lumen; GO:0005783 endoplasmic reticulum; GO:0005788 endoplasmic reticulum lumen; GO:0005789 endoplasmic reticulum membrane; GO:0005790…	GO:0005102 signaling receptor binding; GO:0005215 transporter activity; GO:0005319 lipid transporter activity; GO:0005488 binding; GO:0005515 protein binding; GO:0005539 glycosaminoglycan binding; GO:0005543 phospholipid binding; GO:0008201 heparin binding; GO:0008289 lipid binding; GO:0015248 sterol transporter activity; GO:0019899 enzyme binding; GO:0035473 lipase binding; GO:0043167 ion bindin…	PF09172	Domain of unknown function (DUF1943)	I	KOG4338	Predicted lipoprotein
Q80YX1	Tenascin OS=Mus musculus OX=10090 GN=Tnc PE=1 SV=1	Tnc	20.9622	1.85753e-06	Up	231.8	32.2	42	42	0.098651	0.081639	0.094729	0.639859	0.580653	0.58472	0.658442	0.652983	1.45987	1.50023	2.40583	2.58845	1.65395	extracellular	K06252	TN; tenascin	mmu05206 MicroRNAs in cancer; mmu05165 Human papillomavirus infection; mmu04151 PI3K-Akt signaling pathway; mmu04512 ECM-receptor interaction; mmu04510 Focal adhesion	GO:0000003 reproduction; GO:0001655 urogenital system development; GO:0001763 morphogenesis of a branching structure; GO:0002009 morphogenesis of an epithelium; GO:0003006 developmental process involved in reproduction; GO:0003401 axis elongation; GO:0006464 cellular protein modification process; GO:0006807 nitrogen compound metabolic process; GO:0006950 response to stress; GO:0007154 cell commun…	GO:0005576 extracellular region; GO:0005604 basement membrane; GO:0005614 interstitial matrix; GO:0005622 intracellular; GO:0005623 cell; GO:0005737 cytoplasm; GO:0005783 endoplasmic reticulum; GO:0005788 endoplasmic reticulum lumen; GO:0012505 endomembrane system; GO:0031012 extracellular matrix; GO:0031974 membrane-enclosed lumen; GO:0043226 organelle; GO:0043227 membrane-bounded organelle; GO:…	GO:0001968 fibronectin binding; GO:0005488 binding; GO:0005515 protein binding; GO:0043394 proteoglycan binding; GO:0045545 syndecan binding; GO:0097367 carbohydrate derivative binding;	PF07974; PF00041; PF00147	EGF-like domain; Fibronectin type III domain; Fibrinogen beta and gamma chains, C-terminal globular domain	T	KOG2579	Ficolin and related extracellular proteins
Q9QXC1	Fetuin-B OS=Mus musculus OX=10090 GN=Fetub PE=1 SV=1	Fetub	16.4896	3.90751e-10	Up	42.712	41	11	11	0.156973	0.135653	0.147329	0.093038	0.093581	0.090179	0.10053	0.091562	2.38013	2.35154	2.423	2.36691	2.56957	extracellular	K23411			GO:0000003 reproduction; GO:0007338 single fertilization; GO:0007339 binding of sperm to zona pellucida; GO:0008037 cell recognition; GO:0009566 fertilization; GO:0009892 negative regulation of metabolic process; GO:0009987 cellular process; GO:0009988 cell-cell recognition; GO:0010466 negative regulation of peptidase activity; GO:0010605 negative regulation of macromolecule metabolic process; GO…	GO:0005576 extracellular region;	GO:0004857 enzyme inhibitor activity; GO:0004866 endopeptidase inhibitor activity; GO:0008191 metalloendopeptidase inhibitor activity; GO:0030234 enzyme regulator activity; GO:0030414 peptidase inhibitor activity; GO:0061134 peptidase regulator activity; GO:0061135 endopeptidase regulator activity; GO:0098772 molecular function regulator;	PF00031	Cystatin domain
P14901	Heme oxygenase 1 OS=Mus musculus OX=10090 GN=Hmox1 PE=1 SV=1	Hmox1	14.6575	1.40568e-08	Up	32.928	59.5	12	12	0.167647	0.146506	0.149737	0.254999	0.234726	0.23789	0.219306	0.256735	2.3089	2.14551	2.20957	2.03672	2.63175	cytoplasm	K00510	HMOX1; heme oxygenase 1 [EC:1.14.14.18]	mmu04216 Ferroptosis; mmu05206 MicroRNAs in cancer; mmu05418 Fluid shear stress and atherosclerosis; mmu05225 Hepatocellular carcinoma; mmu01100 Metabolic pathways; mmu00860 Porphyrin and chlorophyll metabolism; mmu04066 HIF-1 signaling pathway; mmu04978 Mineral absorption; mmu05200 Pathways in cancer	GO:0000302 response to reactive oxygen species; GO:0001525 angiogenesis; GO:0001568 blood vessel development; GO:0001666 response to hypoxia; GO:0001817 regulation of cytokine production; GO:0001818 negative regulation of cytokine production; GO:0001889 liver development; GO:0001936 regulation of endothelial cell proliferation; GO:0001938 positive regulation of endothelial cell proliferation; GO:…	GO:0005622 intracellular; GO:0005623 cell; GO:0005634 nucleus; GO:0005730 nucleolus; GO:0005737 cytoplasm; GO:0005783 endoplasmic reticulum; GO:0005829 cytosol; GO:0005886 plasma membrane; GO:0005901 caveola; GO:0012505 endomembrane system; GO:0016020 membrane; GO:0031974 membrane-enclosed lumen; GO:0031981 nuclear lumen; GO:0043226 organelle; GO:0043227 membrane-bounded organelle; GO:0043228 non…	GO:0003824 catalytic activity; GO:0004392 heme oxygenase (decyclizing) activity; GO:0004620 phospholipase activity; GO:0004630 phospholipase D activity; GO:0005488 binding; GO:0005515 protein binding; GO:0008081 phosphoric diester hydrolase activity; GO:0016298 lipase activity; GO:0016491 oxidoreductase activity; GO:0016705 oxidoreductase activity, acting on paired donors, with incorporation or r…	PF01126	Heme oxygenase	P	KOG4480	Heme oxygenase
Q5FW60	Major urinary protein 20 OS=Mus musculus OX=10090 GN=Mup20 PE=1 SV=1	Mup20	14.2997	1.87095e-10	Up	20.93	75.7	14	9	0.103671	0.110837	0.099732	1.05855	1.05025	1.04832	1.00977	1.02964	1.52583	1.54579	1.49964	1.40539	1.51258	extracellular				GO:0001659 temperature homeostasis; GO:0002791 regulation of peptide secretion; GO:0002792 negative regulation of peptide secretion; GO:0003008 system process; GO:0006091 generation of precursor metabolites and energy; GO:0006109 regulation of carbohydrate metabolic process; GO:0006111 regulation of gluconeogenesis; GO:0006112 energy reserve metabolic process; GO:0006355 regulation of transcripti…	GO:0005576 extracellular region; GO:0005615 extracellular space; GO:0005622 intracellular; GO:0005623 cell; GO:0005634 nucleus; GO:0005737 cytoplasm; GO:0005829 cytosol; GO:0043226 organelle; GO:0043227 membrane-bounded organelle; GO:0043229 intracellular organelle; GO:0043231 intracellular membrane-bounded organelle;	GO:0000772 mating pheromone activity; GO:0003824 catalytic activity; GO:0004672 protein kinase activity; GO:0004713 protein tyrosine kinase activity; GO:0004714 transmembrane receptor protein tyrosine kinase activity; GO:0004888 transmembrane signaling receptor activity; GO:0005009 insulin-activated receptor activity; GO:0005102 signaling receptor binding; GO:0005186 pheromone activity; GO:000548…	PF00061	Lipocalin / cytosolic fatty-acid binding protein family
B5X0G2	Major urinary protein 17 OS=Mus musculus OX=10090 GN=Mup17 PE=2 SV=2	Mup17	13.8797	8.26237e-10	Up	20.638	82.2	17	4	0.126851	0.120469	0.108988	0.833434	0.870659	0.922439	0.869909	0.904816	1.64989	1.71892	1.68265	1.54889	1.64209	extracellular				GO:0001659 temperature homeostasis; GO:0002791 regulation of peptide secretion; GO:0002792 negative regulation of peptide secretion; GO:0003008 system process; GO:0006091 generation of precursor metabolites and energy; GO:0006109 regulation of carbohydrate metabolic process; GO:0006111 regulation of gluconeogenesis; GO:0006112 energy reserve metabolic process; GO:0006355 regulation of transcripti…	GO:0005576 extracellular region; GO:0005615 extracellular space; GO:0005622 intracellular; GO:0005623 cell; GO:0005634 nucleus; GO:0005737 cytoplasm; GO:0005829 cytosol; GO:0043226 organelle; GO:0043227 membrane-bounded organelle; GO:0043229 intracellular organelle; GO:0043231 intracellular membrane-bounded organelle;	GO:0000772 mating pheromone activity; GO:0003824 catalytic activity; GO:0004672 protein kinase activity; GO:0004713 protein tyrosine kinase activity; GO:0004714 transmembrane receptor protein tyrosine kinase activity; GO:0004888 transmembrane signaling receptor activity; GO:0005009 insulin-activated receptor activity; GO:0005102 signaling receptor binding; GO:0005186 pheromone activity; GO:000548…	PF00061	Lipocalin / cytosolic fatty-acid binding protein family
Q8VHX6	Filamin-C OS=Mus musculus OX=10090 GN=Flnc PE=1 SV=3	Flnc	13.1474	0.000134049	Up	291.12	22.9	42	30		0.157577	0.179577	0.113289	0.132448	0.130413	0.105714	0.0992	2.22115	1.61075	1.74223	1.91187	3.59578	cytoplasm	K04437	FLNA; filamin	mmu04010 MAPK signaling pathway; mmu05205 Proteoglycans in cancer; mmu04510 Focal adhesion; mmu05132 Salmonella infection	GO:0009987 cellular process; GO:0016043 cellular component organization; GO:0022607 cellular component assembly; GO:0030029 actin filament-based process; GO:0030154 cell differentiation; GO:0032502 developmental process; GO:0034329 cell junction assembly; GO:0034330 cell junction organization; GO:0042692 muscle cell differentiation; GO:0044085 cellular component biogenesis; GO:0048468 cell develo…	GO:0005622 intracellular; GO:0005623 cell; GO:0005737 cytoplasm; GO:0005829 cytosol; GO:0005856 cytoskeleton; GO:0005886 plasma membrane; GO:0015629 actin cytoskeleton; GO:0016020 membrane; GO:0016528 sarcoplasm; GO:0030016 myofibril; GO:0042383 sarcolemma; GO:0043034 costamere; GO:0043226 organelle; GO:0043228 non-membrane-bounded organelle; GO:0043229 intracellular organelle; GO:0043232 intrace…	GO:0003779 actin binding; GO:0005488 binding; GO:0005515 protein binding; GO:0008092 cytoskeletal protein binding; GO:0030506 ankyrin binding; GO:0042802 identical protein binding;	PF00307; PF00630	Calponin homology (CH) domain; Filamin/ABP280 repeat	Z	KOG0518	Actin-binding cytoskeleton protein, filamin
A2BIM8	Major urinary protein 18 OS=Mus musculus OX=10090 GN=Mup18 PE=3 SV=1	Mup18	11.3507	5.17461e-11	Up	20.762	81.8	18	0	0.130828	0.143026	0.132709	0.958897	1.00087	0.985595	0.985319	0.971491	1.5616	1.53643	1.53943	1.4903	1.56351	extracellular				GO:0001659 temperature homeostasis; GO:0002791 regulation of peptide secretion; GO:0002792 negative regulation of peptide secretion; GO:0003008 system process; GO:0006091 generation of precursor metabolites and energy; GO:0006109 regulation of carbohydrate metabolic process; GO:0006111 regulation of gluconeogenesis; GO:0006112 energy reserve metabolic process; GO:0006355 regulation of transcripti…	GO:0005576 extracellular region; GO:0005615 extracellular space; GO:0005622 intracellular; GO:0005623 cell; GO:0005634 nucleus; GO:0005737 cytoplasm; GO:0005829 cytosol; GO:0043226 organelle; GO:0043227 membrane-bounded organelle; GO:0043229 intracellular organelle; GO:0043231 intracellular membrane-bounded organelle;	GO:0000772 mating pheromone activity; GO:0003824 catalytic activity; GO:0004672 protein kinase activity; GO:0004713 protein tyrosine kinase activity; GO:0004714 transmembrane receptor protein tyrosine kinase activity; GO:0004888 transmembrane signaling receptor activity; GO:0005009 insulin-activated receptor activity; GO:0005102 signaling receptor binding; GO:0005186 pheromone activity; GO:000548…	PF00061	Lipocalin / cytosolic fatty-acid binding protein family
P04939	Major urinary protein 3 OS=Mus musculus OX=10090 GN=Mup3 PE=1 SV=1	Mup3	11.1842	6.40233e-10	Up	21.464	50	9	5	0.139958	0.157155	0.160654	0.781279	0.81075	0.801466	0.779068	0.836758	1.75721	1.73946	1.67794	1.64368	1.71463	extracellular				GO:0001659 temperature homeostasis; GO:0002791 regulation of peptide secretion; GO:0002792 negative regulation of peptide secretion; GO:0003008 system process; GO:0006091 generation of precursor metabolites and energy; GO:0006109 regulation of carbohydrate metabolic process; GO:0006111 regulation of gluconeogenesis; GO:0006112 energy reserve metabolic process; GO:0006355 regulation of transcripti…	GO:0005576 extracellular region; GO:0005615 extracellular space; GO:0005622 intracellular; GO:0005623 cell; GO:0005634 nucleus; GO:0005737 cytoplasm; GO:0005829 cytosol; GO:0043226 organelle; GO:0043227 membrane-bounded organelle; GO:0043229 intracellular organelle; GO:0043231 intracellular membrane-bounded organelle;	GO:0000772 mating pheromone activity; GO:0003824 catalytic activity; GO:0004672 protein kinase activity; GO:0004713 protein tyrosine kinase activity; GO:0004714 transmembrane receptor protein tyrosine kinase activity; GO:0004888 transmembrane signaling receptor activity; GO:0005009 insulin-activated receptor activity; GO:0005102 signaling receptor binding; GO:0005186 pheromone activity; GO:000548…	PF00061	Lipocalin / cytosolic fatty-acid binding protein family
Q61704	Inter-alpha-trypsin inhibitor heavy chain H3 OS=Mus musculus OX=10090 GN=Itih3 PE=1 SV=3	Itih3	11.1234	4.97737e-07	Up	99.357	18.9	10	10	0.166239	0.177189	0.116061	0.022047					1.86499	1.618	1.52536	1.79534	1.71477	mitochondria	K24513				GO:0005576 extracellular region;		PF00092	von Willebrand factor type A domain
P11672	Neutrophil gelatinase-associated lipocalin OS=Mus musculus OX=10090 GN=Lcn2 PE=1 SV=1	Lcn2	10.8142	2.02068e-05	Up	22.875	27	5	5	0.184447	0.273192	0.193027	0.189474	0.080718	0.135835	0.094263	0.121609	1.86616	2.99013	1.71725	1.92701	3.22689	extracellular	K21129	LCN2; lipocalin 2	mmu04657 IL-17 signaling pathway	GO:0000302 response to reactive oxygen species; GO:0001775 cell activation; GO:0002237 response to molecule of bacterial origin; GO:0002252 immune effector process; GO:0002263 cell activation involved in immune response; GO:0002274 myeloid leukocyte activation; GO:0002275 myeloid cell activation involved in immune response; GO:0002283 neutrophil activation involved in immune response; GO:0002366 …	GO:0005576 extracellular region; GO:0005615 extracellular space; GO:0005622 intracellular; GO:0005623 cell; GO:0005737 cytoplasm; GO:0005829 cytosol; GO:0012505 endomembrane system; GO:0030141 secretory granule; GO:0031410 cytoplasmic vesicle; GO:0031974 membrane-enclosed lumen; GO:0031982 vesicle; GO:0031983 vesicle lumen; GO:0034774 secretory granule lumen; GO:0035580 specific granule lumen; GO…	GO:0002020 protease binding; GO:0005488 binding; GO:0005506 iron ion binding; GO:0005515 protein binding; GO:0019899 enzyme binding; GO:0042802 identical protein binding; GO:0042803 protein homodimerization activity; GO:0043167 ion binding; GO:0043169 cation binding; GO:0046872 metal ion binding; GO:0046914 transition metal ion binding; GO:0046983 protein dimerization activity;	PF00061	Lipocalin / cytosolic fatty-acid binding protein family
Q91WP6	Serine protease inhibitor A3N OS=Mus musculus OX=10090 GN=Serpina3n PE=1 SV=1	Serpina3n	10.7461	2.72192e-10	Up	46.717	47.6	17	14	0.216534	0.208197	0.233308	0.109358	0.112338	0.112345	0.112266	0.110013	2.35166	2.46562	2.34568	2.35087	2.27182	endoplasmic reticulum	K04525			GO:0001775 cell activation; GO:0001894 tissue homeostasis; GO:0002252 immune effector process; GO:0002263 cell activation involved in immune response; GO:0002274 myeloid leukocyte activation; GO:0002275 myeloid cell activation involved in immune response; GO:0002283 neutrophil activation involved in immune response; GO:0002366 leukocyte activation involved in immune response; GO:0002376 immune sy…	GO:0000323 lytic vacuole; GO:0005576 extracellular region; GO:0005615 extracellular space; GO:0005622 intracellular; GO:0005623 cell; GO:0005634 nucleus; GO:0005737 cytoplasm; GO:0005764 lysosome; GO:0005766 primary lysosome; GO:0005773 vacuole; GO:0005775 vacuolar lumen; GO:0012505 endomembrane system; GO:0030141 secretory granule; GO:0031091 platelet alpha granule; GO:0031093 platelet alpha gra…	GO:0003676 nucleic acid binding; GO:0003677 DNA binding; GO:0004857 enzyme inhibitor activity; GO:0004866 endopeptidase inhibitor activity; GO:0004867 serine-type endopeptidase inhibitor activity; GO:0004869 cysteine-type endopeptidase inhibitor activity; GO:0005488 binding; GO:0030234 enzyme regulator activity; GO:0030414 peptidase inhibitor activity; GO:0061134 peptidase regulator activity; GO:…	PF00079	Serpin (serine protease inhibitor)	V	KOG2392	Serpin
Q9R269	Periplakin OS=Mus musculus OX=10090 GN=Ppl PE=1 SV=1	Ppl	10.4863	0.000207807	Up	204	23.4	31	30	0.227543	0.07398	0.24894	0.556368	0.524652	0.621319	0.596229	0.530415	2.21787	1.41629	1.73906	2.33698	1.91036	nucleus	K10386			GO:0006996 organelle organization; GO:0007010 cytoskeleton organization; GO:0007275 multicellular organism development; GO:0008219 cell death; GO:0008544 epidermis development; GO:0009605 response to external stimulus; GO:0009612 response to mechanical stimulus; GO:0009628 response to abiotic stimulus; GO:0009888 tissue development; GO:0009913 epidermal cell differentiation; GO:0009987 cellular p…	GO:0001533 cornified envelope; GO:0005622 intracellular; GO:0005623 cell; GO:0005634 nucleus; GO:0005737 cytoplasm; GO:0005739 mitochondrion; GO:0005829 cytosol; GO:0005856 cytoskeleton; GO:0005886 plasma membrane; GO:0005911 cell-cell junction; GO:0016020 membrane; GO:0019897 extrinsic component of plasma membrane; GO:0019898 extrinsic component of membrane; GO:0030054 cell junction; GO:0030057 …	GO:0005198 structural molecule activity; GO:0005200 structural constituent of cytoskeleton;			Z	KOG0516	Dystonin, GAS (Growth-arrest-specific protein), and related proteins
P11589	Major urinary protein 2 OS=Mus musculus OX=10090 GN=Mup2 PE=1 SV=1	Mup2	10.3239	1.99234e-10	Up	20.663	77.8	17	3	0.146379	0.145381	0.159068	0.929577	0.968941	0.959298	0.979375	0.95483	1.60906	1.55861	1.56375	1.47773	1.548	extracellular				GO:0001659 temperature homeostasis; GO:0002791 regulation of peptide secretion; GO:0002792 negative regulation of peptide secretion; GO:0003008 system process; GO:0006091 generation of precursor metabolites and energy; GO:0006109 regulation of carbohydrate metabolic process; GO:0006111 regulation of gluconeogenesis; GO:0006112 energy reserve metabolic process; GO:0006355 regulation of transcripti…	GO:0005576 extracellular region; GO:0005615 extracellular space; GO:0005622 intracellular; GO:0005623 cell; GO:0005634 nucleus; GO:0005737 cytoplasm; GO:0005829 cytosol; GO:0043226 organelle; GO:0043227 membrane-bounded organelle; GO:0043229 intracellular organelle; GO:0043231 intracellular membrane-bounded organelle;	GO:0000772 mating pheromone activity; GO:0003824 catalytic activity; GO:0004672 protein kinase activity; GO:0004713 protein tyrosine kinase activity; GO:0004714 transmembrane receptor protein tyrosine kinase activity; GO:0004888 transmembrane signaling receptor activity; GO:0005009 insulin-activated receptor activity; GO:0005102 signaling receptor binding; GO:0005186 pheromone activity; GO:000548…	PF00061	Lipocalin / cytosolic fatty-acid binding protein family
P12246	Serum amyloid P-component OS=Mus musculus OX=10090 GN=Apcs PE=1 SV=2	Apcs	9.6755	0.000149314	Up	26.247	17.4	3	3	0.12469		0.153211						1.50833	1.48507	0.79233	1.38888	1.54749	extracellular	K23267			GO:0002376 immune system process; GO:0002526 acute inflammatory response; GO:0002673 regulation of acute inflammatory response; GO:0002674 negative regulation of acute inflammatory response; GO:0002682 regulation of immune system process; GO:0002683 negative regulation of immune system process; GO:0002761 regulation of myeloid leukocyte differentiation; GO:0002762 negative regulation of myeloid l…	GO:0005576 extracellular region; GO:0005615 extracellular space; GO:0032991 protein-containing complex;	GO:0001846 opsonin binding; GO:0001848 complement binding; GO:0001849 complement component C1q complex binding; GO:0005488 binding; GO:0005509 calcium ion binding; GO:0005515 protein binding; GO:0042802 identical protein binding; GO:0043167 ion binding; GO:0043169 cation binding; GO:0046790 virion binding; GO:0046872 metal ion binding; GO:0051082 unfolded protein binding;	PF00354	Pentaxin family
E9PYK3	Protein mono-ADP-ribosyltransferase PARP4 OS=Mus musculus OX=10090 GN=Parp4 PE=1 SV=1	Parp4	9.3198	7.73318e-05	Up	216.13	10.3	14	14	0.239872	0.17032		0.438571	0.303894	0.311195	0.637501	0.341347	1.47315	1.63994	2.58494	1.75856	2.10071	nucleus	K10798	PARP2_3_4; poly [ADP-ribose] polymerase 2/3/4 [EC:2.4.2.30]	mmu04210 Apoptosis; mmu03410 Base excision repair	GO:0006139 nucleobase-containing compound metabolic process; GO:0006259 DNA metabolic process; GO:0006281 DNA repair; GO:0006464 cellular protein modification process; GO:0006471 protein ADP-ribosylation; GO:0006725 cellular aromatic compound metabolic process; GO:0006807 nitrogen compound metabolic process; GO:0006950 response to stress; GO:0006952 defense response; GO:0006954 inflammatory respo…	GO:0005622 intracellular; GO:0005623 cell; GO:0005634 nucleus; GO:0005737 cytoplasm; GO:0005819 spindle; GO:0005829 cytosol; GO:0005856 cytoskeleton; GO:0005874 microtubule; GO:0005876 spindle microtubule; GO:0015630 microtubule cytoskeleton; GO:0032991 protein-containing complex; GO:0043226 organelle; GO:0043227 membrane-bounded organelle; GO:0043228 non-membrane-bounded organelle; GO:0043229 in…	GO:0003676 nucleic acid binding; GO:0003677 DNA binding; GO:0003824 catalytic activity; GO:0003950 NAD+ ADP-ribosyltransferase activity; GO:0005488 binding; GO:0005515 protein binding; GO:0016740 transferase activity; GO:0016757 transferase activity, transferring glycosyl groups; GO:0016763 transferase activity, transferring pentosyl groups; GO:0019899 enzyme binding; GO:0097159 organic cyclic co…	PF13768	von Willebrand factor type A domain	KLO	KOG1037	NAD+ ADP-ribosyltransferase Parp, required for poly-ADP ribosylation of nuclear proteins
Q9D975	Sulfiredoxin-1 OS=Mus musculus OX=10090 GN=Srxn1 PE=2 SV=1	Srxn1	9.0926	4.21236e-12	Up	14.149	54.4	4	4	0.245837	0.233146	0.240115	0.282526	0.280581	0.258032	0.280711	0.281627	2.1966	2.14479	2.17662	2.15865	2.22076	cytoplasm,nucleus	K12260			GO:0006950 response to stress; GO:0006979 response to oxidative stress; GO:0008152 metabolic process; GO:0009636 response to toxic substance; GO:0009987 cellular process; GO:0033554 cellular response to stress; GO:0034599 cellular response to oxidative stress; GO:0042221 response to chemical; GO:0050896 response to stimulus; GO:0051716 cellular response to stimulus; GO:0055114 oxidation-reduction…	GO:0005622 intracellular; GO:0005623 cell; GO:0005737 cytoplasm; GO:0005829 cytosol;	GO:0003824 catalytic activity; GO:0016209 antioxidant activity; GO:0016491 oxidoreductase activity; GO:0016667 oxidoreductase activity, acting on a sulfur group of donors; GO:0032542 sulfiredoxin activity;			L	KOG3388	Predicted transcription regulator/nuclease, contains ParB domain
P11688	Integrin alpha-5 OS=Mus musculus OX=10090 GN=Itga5 PE=1 SV=3	Itga5	8.9887	0.000544116	Up	115.04	17.2	15	15		0.269994	0.204735	0.117283	0.11233	0.089636	0.383852	0.154138	2.57009	2.49434	1.11778	2.53767	1.94815	mitochondria	K06484	ITGA5; integrin alpha 5	mmu05165 Human papillomavirus infection; mmu04810 Regulation of actin cytoskeleton; mmu04510 Focal adhesion; mmu05135 Yersinia infection; mmu04640 Hematopoietic cell lineage; mmu05205 Proteoglycans in cancer; mmu04512 ECM-receptor interaction; mmu05206 MicroRNAs in cancer; mmu05414 Dilated cardiomyopathy; mmu05412 Arrhythmogenic right ventricular cardiomyopathy; mmu05133 Pertussis; mmu04151 PI3K-…	GO:0001525 angiogenesis; GO:0001568 blood vessel development; GO:0001704 formation of primary germ layer; GO:0001706 endoderm formation; GO:0001932 regulation of protein phosphorylation; GO:0001934 positive regulation of protein phosphorylation; GO:0001944 vasculature development; GO:0002009 morphogenesis of an epithelium; GO:0002011 morphogenesis of an epithelial sheet; GO:0002376 immune system …	GO:0001726 ruffle; GO:0005622 intracellular; GO:0005623 cell; GO:0005737 cytoplasm; GO:0005783 endoplasmic reticulum; GO:0005794 Golgi apparatus; GO:0005886 plasma membrane; GO:0005887 integral component of plasma membrane; GO:0005912 adherens junction; GO:0005925 focal adhesion; GO:0008305 integrin complex; GO:0009897 external side of plasma membrane; GO:0009986 cell surface; GO:0012505 endomemb…	GO:0005102 signaling receptor binding; GO:0005126 cytokine receptor binding; GO:0005154 epidermal growth factor receptor binding; GO:0005161 platelet-derived growth factor receptor binding; GO:0005172 vascular endothelial growth factor receptor binding; GO:0005178 integrin binding; GO:0005488 binding; GO:0005515 protein binding; GO:0043184 vascular endothelial growth factor receptor 2 binding; GO…			W	KOG3637	Vitronectin receptor, alpha subunit
P31725	Protein S100-A9 OS=Mus musculus OX=10090 GN=S100a9 PE=1 SV=3	S100a9	8.8378	4.06608e-10	Up	13.049	45.1	5	5	0.25595	0.234614	0.258344	0.229899	0.257481	0.245112	0.239498	0.247919	2.29766	2.24699	2.17834	2.11163	2.19657	cytoplasm	K21128	S100A9; protein S100-A9	mmu04657 IL-17 signaling pathway	GO:0001558 regulation of cell growth; GO:0001775 cell activation; GO:0001816 cytokine production; GO:0002218 activation of innate immune response; GO:0002221 pattern recognition receptor signaling pathway; GO:0002224 toll-like receptor signaling pathway; GO:0002237 response to molecule of bacterial origin; GO:0002252 immune effector process; GO:0002253 activation of immune response; GO:0002263 ce…	GO:0005576 extracellular region; GO:0005615 extracellular space; GO:0005622 intracellular; GO:0005623 cell; GO:0005634 nucleus; GO:0005654 nucleoplasm; GO:0005737 cytoplasm; GO:0005829 cytosol; GO:0005856 cytoskeleton; GO:0005886 plasma membrane; GO:0012505 endomembrane system; GO:0016020 membrane; GO:0030054 cell junction; GO:0030141 secretory granule; GO:0031410 cytoplasmic vesicle; GO:0031974 …	GO:0005102 signaling receptor binding; GO:0005488 binding; GO:0005504 fatty acid binding; GO:0005509 calcium ion binding; GO:0005515 protein binding; GO:0008017 microtubule binding; GO:0008092 cytoskeletal protein binding; GO:0008270 zinc ion binding; GO:0008289 lipid binding; GO:0015631 tubulin binding; GO:0031406 carboxylic acid binding; GO:0033293 monocarboxylic acid binding; GO:0035325 Toll-l…	PF01023	S-100/ICaBP type calcium binding domain
P27005	Protein S100-A8 OS=Mus musculus OX=10090 GN=S100a8 PE=1 SV=3	S100a8	8.2601	6.55933e-11	Up	10.294	49.4	2	2	0.256381	0.256911	0.277132	0.254274	0.268089	0.266441	0.271399	0.267745	2.18146	2.22287	2.17157	2.12471	2.18103	cytoplasm	K21127	S100A8; protein S100-A8	mmu04657 IL-17 signaling pathway	GO:0001558 regulation of cell growth; GO:0001775 cell activation; GO:0001816 cytokine production; GO:0002218 activation of innate immune response; GO:0002221 pattern recognition receptor signaling pathway; GO:0002224 toll-like receptor signaling pathway; GO:0002237 response to molecule of bacterial origin; GO:0002252 immune effector process; GO:0002253 activation of immune response; GO:0002263 ce…	GO:0005576 extracellular region; GO:0005615 extracellular space; GO:0005622 intracellular; GO:0005623 cell; GO:0005737 cytoplasm; GO:0005829 cytosol; GO:0005856 cytoskeleton; GO:0005886 plasma membrane; GO:0012505 endomembrane system; GO:0016020 membrane; GO:0030141 secretory granule; GO:0031410 cytoplasmic vesicle; GO:0031974 membrane-enclosed lumen; GO:0031982 vesicle; GO:0031983 vesicle lumen;…	GO:0005102 signaling receptor binding; GO:0005488 binding; GO:0005504 fatty acid binding; GO:0005509 calcium ion binding; GO:0005515 protein binding; GO:0008017 microtubule binding; GO:0008092 cytoskeletal protein binding; GO:0008270 zinc ion binding; GO:0008289 lipid binding; GO:0015631 tubulin binding; GO:0031406 carboxylic acid binding; GO:0033293 monocarboxylic acid binding; GO:0035325 Toll-l…	PF01023	S-100/ICaBP type calcium binding domain
Q9WTQ5	A-kinase anchor protein 12 OS=Mus musculus OX=10090 GN=Akap12 PE=1 SV=1	Akap12	7.0497	5.91845e-11	Up	180.69	52.3	50	50	0.257764	0.275721	0.271186	0.555592	0.553209	0.557679	0.544675	0.529706	1.91437	1.93861	1.85699	1.84757	1.89693	nucleus	K16528			GO:0007154 cell communication; GO:0007165 signal transduction; GO:0007186 G protein-coupled receptor signaling pathway; GO:0007187 G protein-coupled receptor signaling pathway, coupled to cyclic nucleotide second messenger; GO:0007188 adenylate cyclase-modulating G protein-coupled receptor signaling pathway; GO:0007193 adenylate cyclase-inhibiting G protein-coupled receptor signaling pathway; GO:…	GO:0005622 intracellular; GO:0005623 cell; GO:0005737 cytoplasm; GO:0005829 cytosol; GO:0005886 plasma membrane; GO:0016020 membrane; GO:0071944 cell periphery;	GO:0005198 structural molecule activity; GO:0005488 binding; GO:0005515 protein binding; GO:0008179 adenylate cyclase binding; GO:0019899 enzyme binding; GO:0030159 signaling receptor complex adaptor activity; GO:0051018 protein kinase A binding;
P11679	Keratin, type II cytoskeletal 8 OS=Mus musculus OX=10090 GN=Krt8 PE=1 SV=4	Krt8	6.9758	5.57244e-11	Up	54.565	68.8	35	12	0.262071	0.250678	0.260756	0.638237	0.657779	0.650646	0.64006	0.646685	1.86953	1.82659	1.77454	1.75999	1.76244	nucleus	K07605			GO:0000003 reproduction; GO:0000902 cell morphogenesis; GO:0000904 cell morphogenesis involved in differentiation; GO:0001101 response to acid chemical; GO:0001701 in utero embryonic development; GO:0001890 placenta development; GO:0001892 embryonic placenta development; GO:0003006 developmental process involved in reproduction; GO:0006915 apoptotic process; GO:0006950 response to stress; GO:0006…	GO:0005622 intracellular; GO:0005623 cell; GO:0005737 cytoplasm; GO:0005829 cytosol; GO:0005856 cytoskeleton; GO:0005882 intermediate filament; GO:0005886 plasma membrane; GO:0005911 cell-cell junction; GO:0016010 dystrophin-associated glycoprotein complex; GO:0016020 membrane; GO:0016327 apicolateral plasma membrane; GO:0030016 myofibril; GO:0030017 sarcomere; GO:0030018 Z disc; GO:0030054 cell …	GO:0005488 binding; GO:0005515 protein binding; GO:0044877 protein-containing complex binding; GO:0097110 scaffold protein binding;
Q9QUJ7	Long-chain-fatty-acid--CoA ligase 4 OS=Mus musculus OX=10090 GN=Acsl4 PE=1 SV=2	Acsl4	6.282	8.40405e-10	Up	79.076	53.4	26	26	0.300655	0.336459	0.310276	0.410579	0.447834	0.446793	0.390253	0.438027	2.00677	2.00658	1.91004	1.97378	2.02195	endoplasmic reticulum	K01897	ACSL; long-chain acyl-CoA synthetase [EC:6.2.1.3]	mmu04920 Adipocytokine signaling pathway; mmu04146 Peroxisome; mmu03320 PPAR signaling pathway; mmu04714 Thermogenesis; mmu01100 Metabolic pathways; mmu00071 Fatty acid degradation; mmu01212 Fatty acid metabolism; mmu04216 Ferroptosis; mmu00061 Fatty acid biosynthesis	GO:0000003 reproduction; GO:0001558 regulation of cell growth; GO:0001676 long-chain fatty acid metabolic process; GO:0006082 organic acid metabolic process; GO:0006139 nucleobase-containing compound metabolic process; GO:0006163 purine nucleotide metabolic process; GO:0006164 purine nucleotide biosynthetic process; GO:0006629 lipid metabolic process; GO:0006631 fatty acid metabolic process; GO:0…	GO:0005622 intracellular; GO:0005623 cell; GO:0005737 cytoplasm; GO:0005739 mitochondrion; GO:0005740 mitochondrial envelope; GO:0005777 peroxisome; GO:0005783 endoplasmic reticulum; GO:0005789 endoplasmic reticulum membrane; GO:0005811 lipid droplet; GO:0012505 endomembrane system; GO:0016020 membrane; GO:0031090 organelle membrane; GO:0031966 mitochondrial membrane; GO:0031967 organelle envelop…	GO:0003824 catalytic activity; GO:0004467 long-chain fatty acid-CoA ligase activity; GO:0015645 fatty acid ligase activity; GO:0016405 CoA-ligase activity; GO:0016874 ligase activity; GO:0016877 ligase activity, forming carbon-sulfur bonds; GO:0016878 acid-thiol ligase activity; GO:0031957 very long-chain fatty acid-CoA ligase activity; GO:0047676 arachidonate-CoA ligase activity;			I	KOG1180	Acyl-CoA synthetase
Q61576	Peptidyl-prolyl cis-trans isomerase FKBP10 OS=Mus musculus OX=10090 GN=Fkbp10 PE=1 SV=2	Fkbp10	5.9418	0.000105898	Up	64.697	23.8	10	9		0.197154	0.354365	0.509849	0.613333	0.625081	0.730406	0.777291	1.75907	1.5964	1.61187	1.46999	1.7552	mitochondria	K09575			GO:0000413 protein peptidyl-prolyl isomerization; GO:0006457 protein folding; GO:0006464 cellular protein modification process; GO:0006807 nitrogen compound metabolic process; GO:0008152 metabolic process; GO:0009987 cellular process; GO:0018193 peptidyl-amino acid modification; GO:0018208 peptidyl-proline modification; GO:0019538 protein metabolic process; GO:0036211 protein modification process…	GO:0005622 intracellular; GO:0005623 cell; GO:0005737 cytoplasm; GO:0005829 cytosol; GO:0016020 membrane;	GO:0003755 peptidyl-prolyl cis-trans isomerase activity; GO:0003824 catalytic activity; GO:0005488 binding; GO:0005527 macrolide binding; GO:0005528 FK506 binding; GO:0008144 drug binding; GO:0016853 isomerase activity; GO:0016859 cis-trans isomerase activity; GO:0097159 organic cyclic compound binding; GO:0140096 catalytic activity, acting on a protein; GO:1901363 heterocyclic compound binding;	PF00254; PF13202	FKBP-type peptidyl-prolyl cis-trans isomerase; EF hand	O	KOG0549	FKBP-type peptidyl-prolyl cis-trans isomerase
O08739	AMP deaminase 3 OS=Mus musculus OX=10090 GN=Ampd3 PE=1 SV=2	Ampd3	5.7511	3.67118e-07	Up	88.651	37.2	21	21	0.367331	0.353624	0.277014	0.449448	0.481384	0.492615	0.527206	0.485708	1.91506	2.05626	1.74881	1.87308	1.97247	cytoplasm	K01490	AMPD; AMP deaminase [EC:3.5.4.6]	mmu01100 Metabolic pathways; mmu00230 Purine metabolism	GO:0001775 cell activation; GO:0002252 immune effector process; GO:0002262 myeloid cell homeostasis; GO:0002263 cell activation involved in immune response; GO:0002274 myeloid leukocyte activation; GO:0002275 myeloid cell activation involved in immune response; GO:0002283 neutrophil activation involved in immune response; GO:0002366 leukocyte activation involved in immune response; GO:0002376 imm…	GO:0005576 extracellular region; GO:0005622 intracellular; GO:0005623 cell; GO:0005737 cytoplasm; GO:0005829 cytosol; GO:0012505 endomembrane system; GO:0030141 secretory granule; GO:0031410 cytoplasmic vesicle; GO:0031974 membrane-enclosed lumen; GO:0031982 vesicle; GO:0031983 vesicle lumen; GO:0034774 secretory granule lumen; GO:0043226 organelle; GO:0043227 membrane-bounded organelle; GO:00432…	GO:0003824 catalytic activity; GO:0003876 AMP deaminase activity; GO:0016787 hydrolase activity; GO:0016810 hydrolase activity, acting on carbon-nitrogen (but not peptide) bonds; GO:0016814 hydrolase activity, acting on carbon-nitrogen (but not peptide) bonds, in cyclic amidines; GO:0019239 deaminase activity; GO:0047623 adenosine-phosphate deaminase activity;	PF00962	Adenosine/AMP deaminase	F	KOG1096	Adenosine monophosphate deaminase
Q99K85	Phosphoserine aminotransferase OS=Mus musculus OX=10090 GN=Psat1 PE=1 SV=1	Psat1	5.545	3.87514e-10	Up	40.472	56.8	18	18	0.348441	0.338292	0.344495	0.468251	0.479358	0.50051	0.497501	0.492943	1.83137	1.88074	2.00124	1.95738	1.85947	cytoplasm,nucleus	K00831	serC; phosphoserine aminotransferase [EC:2.6.1.52]	mmu01230 Biosynthesis of amino acids; mmu01200 Carbon metabolism; mmu00750 Vitamin B6 metabolism; mmu00260 Glycine, serine and threonine metabolism; mmu00270 Cysteine and methionine metabolism; mmu01100 Metabolic pathways; mmu01240 Biosynthesis of cofactors	GO:0006082 organic acid metabolic process; GO:0006520 cellular amino acid metabolic process; GO:0006563 L-serine metabolic process; GO:0006564 L-serine biosynthetic process; GO:0006725 cellular aromatic compound metabolic process; GO:0006766 vitamin metabolic process; GO:0006767 water-soluble vitamin metabolic process; GO:0006807 nitrogen compound metabolic process; GO:0008152 metabolic process; …	GO:0005622 intracellular; GO:0005623 cell; GO:0005737 cytoplasm; GO:0005829 cytosol;	GO:0003824 catalytic activity; GO:0004648 O-phospho-L-serine:2-oxoglutarate aminotransferase activity; GO:0008483 transaminase activity; GO:0016740 transferase activity; GO:0016769 transferase activity, transferring nitrogenous groups;	PF00266	Aminotransferase class-V	E	KOG2790	Phosphoserine aminotransferase
A6X935	Inter alpha-trypsin inhibitor, heavy chain 4 OS=Mus musculus OX=10090 GN=Itih4 PE=1 SV=2	Itih4	5.4329	4.57103e-09	Up	104.66	52.9	32	30	0.413507	0.413983	0.377528	0.180013	0.179848	0.172164	0.170749	0.181033	2.30639	2.16855	2.04304	2.18646	2.20674	extracellular	K24514			GO:0002526 acute inflammatory response; GO:0002576 platelet degranulation; GO:0006810 transport; GO:0006887 exocytosis; GO:0006950 response to stress; GO:0006952 defense response; GO:0006953 acute-phase response; GO:0006954 inflammatory response; GO:0009892 negative regulation of metabolic process; GO:0009987 cellular process; GO:0010033 response to organic substance; GO:0010466 negative regulati…	GO:0005576 extracellular region; GO:0005622 intracellular; GO:0005623 cell; GO:0005737 cytoplasm; GO:0005886 plasma membrane; GO:0012505 endomembrane system; GO:0016020 membrane; GO:0030141 secretory granule; GO:0031089 platelet dense granule lumen; GO:0031410 cytoplasmic vesicle; GO:0031974 membrane-enclosed lumen; GO:0031982 vesicle; GO:0031983 vesicle lumen; GO:0034774 secretory granule lumen;…	GO:0004857 enzyme inhibitor activity; GO:0004866 endopeptidase inhibitor activity; GO:0030234 enzyme regulator activity; GO:0030414 peptidase inhibitor activity; GO:0061134 peptidase regulator activity; GO:0061135 endopeptidase regulator activity; GO:0098772 molecular function regulator;	PF00092	von Willebrand factor type A domain
Q8K354	Carbonyl reductase [NADPH] 3 OS=Mus musculus OX=10090 GN=Cbr3 PE=1 SV=1	Cbr3	5.363	2.37182e-07	Up	30.953	59.6	13	12	0.333149	0.371173	0.275495	0.650248	0.663834	0.653493	0.633527	0.661084	1.67721	1.79096	1.77825	1.79266	1.71891	mitochondria	K00084	CBR3; carbonyl reductase 3 [EC:1.1.1.184]	mmu01100 Metabolic pathways; mmu00980 Metabolism of xenobiotics by cytochrome P450; mmu00590 Arachidonic acid metabolism	GO:0003008 system process; GO:0006732 coenzyme metabolic process; GO:0006766 vitamin metabolic process; GO:0006805 xenobiotic metabolic process; GO:0008152 metabolic process; GO:0009056 catabolic process; GO:0009109 coenzyme catabolic process; GO:0009111 vitamin catabolic process; GO:0009410 response to xenobiotic stimulus; GO:0009987 cellular process; GO:0032501 multicellular organismal process;…	GO:0005622 intracellular; GO:0005623 cell; GO:0005634 nucleus; GO:0005654 nucleoplasm; GO:0005737 cytoplasm; GO:0005829 cytosol; GO:0031974 membrane-enclosed lumen; GO:0031981 nuclear lumen; GO:0043226 organelle; GO:0043227 membrane-bounded organelle; GO:0043229 intracellular organelle; GO:0043231 intracellular membrane-bounded organelle; GO:0043233 organelle lumen; GO:0070013 intracellular organ…	GO:0000166 nucleotide binding; GO:0000253 3-keto sterol reductase activity; GO:0003824 catalytic activity; GO:0004090 carbonyl reductase (NADPH) activity; GO:0005488 binding; GO:0016491 oxidoreductase activity; GO:0016614 oxidoreductase activity, acting on CH-OH group of donors; GO:0016616 oxidoreductase activity, acting on the CH-OH group of donors, NAD or NADP as acceptor; GO:0036094 small mole…	PF00106; PF13561	short chain dehydrogenase; Enoyl-(Acyl carrier protein) reductase	Q	KOG1208	Dehydrogenases with different specificities (related to short-chain alcohol dehydrogenases)
P15947	Kallikrein-1 OS=Mus musculus OX=10090 GN=Klk1 PE=1 SV=3	Klk1	5.2859	4.67705e-11	Up	28.774	67.4	14	14	0.310563	0.323435	0.328983	0.691881	0.717552	0.711263	0.713641	0.71901	1.72614	1.67488	1.72624	1.67498	1.68143	extracellular	K01325	KLK1_2; tissue kallikrein [EC:3.4.21.35]	mmu04961 Endocrine and other factor-regulated calcium reabsorption; mmu04614 Renin-angiotensin system	GO:0002254 kinin cascade; GO:0002255 tissue kallikrein-kinin cascade; GO:0002526 acute inflammatory response; GO:0002936 bradykinin biosynthetic process; GO:0003007 heart morphogenesis; GO:0003008 system process; GO:0003012 muscle system process; GO:0003013 circulatory system process; GO:0003015 heart process; GO:0003018 vascular process in circulatory system; GO:0003073 regulation of systemic ar…	GO:0005576 extracellular region; GO:0005615 extracellular space; GO:0005622 intracellular; GO:0005623 cell; GO:0005634 nucleus; GO:0032991 protein-containing complex; GO:0043226 organelle; GO:0043227 membrane-bounded organelle; GO:0043229 intracellular organelle; GO:0043231 intracellular membrane-bounded organelle;	GO:0003824 catalytic activity; GO:0004175 endopeptidase activity; GO:0004252 serine-type endopeptidase activity; GO:0008233 peptidase activity; GO:0008236 serine-type peptidase activity; GO:0016787 hydrolase activity; GO:0016810 hydrolase activity, acting on carbon-nitrogen (but not peptide) bonds; GO:0016811 hydrolase activity, acting on carbon-nitrogen (but not peptide) bonds, in linear amides;…	PF00089	Trypsin	O	KOG3627	Trypsin
Q9R0B9	Procollagen-lysine,2-oxoglutarate 5-dioxygenase 2 OS=Mus musculus OX=10090 GN=Plod2 PE=1 SV=2	Plod2	5.2767	0.00199367	Up	84.487	12.8	7	7	0.49038	0.166964		0.604841	0.569244	0.407438	0.480433	0.609148	1.4255	2.11378	1.74639	1.64142	1.74447	mitochondria	K13645	PLOD2; procollagen-lysine,2-oxoglutarate 5-dioxygenase 2 [EC:1.14.11.4]	mmu00310 Lysine degradation; mmu01100 Metabolic pathways	GO:0001666 response to hypoxia; GO:0006082 organic acid metabolic process; GO:0006464 cellular protein modification process; GO:0006520 cellular amino acid metabolic process; GO:0006575 cellular modified amino acid metabolic process; GO:0006807 nitrogen compound metabolic process; GO:0006950 response to stress; GO:0008152 metabolic process; GO:0008652 cellular amino acid biosynthetic process; GO:…	GO:0005622 intracellular; GO:0005623 cell; GO:0005737 cytoplasm; GO:0005783 endoplasmic reticulum; GO:0005789 endoplasmic reticulum membrane; GO:0005791 rough endoplasmic reticulum; GO:0012505 endomembrane system; GO:0016020 membrane; GO:0030867 rough endoplasmic reticulum membrane; GO:0031090 organelle membrane; GO:0031984 organelle subcompartment; GO:0042175 nuclear outer membrane-endoplasmic r…	GO:0003824 catalytic activity; GO:0008475 procollagen-lysine 5-dioxygenase activity; GO:0016491 oxidoreductase activity; GO:0016705 oxidoreductase activity, acting on paired donors, with incorporation or reduction of molecular oxygen; GO:0016706 2-oxoglutarate-dependent dioxygenase activity; GO:0051213 dioxygenase activity; GO:0070815 peptidyl-lysine 5-dioxygenase activity; GO:0140096 catalytic a…	PF03171	2OG-Fe(II) oxygenase superfamily	O	KOG1971	Lysyl hydroxylase
P35230	Regenerating islet-derived protein 3-beta OS=Mus musculus OX=10090 GN=Reg3b PE=1 SV=1	Reg3b	5.2278	1.31598e-08	Up	19.476	17.7	2	2	0.288387	0.300754	0.336399	0.776345	0.796486	0.759282	0.833743	0.844336	1.63122	1.66811	1.65955	1.53422	1.57116	extracellular				GO:0000003 reproduction; GO:0001101 response to acid chemical; GO:0001906 cell killing; GO:0001932 regulation of protein phosphorylation; GO:0001934 positive regulation of protein phosphorylation; GO:0002218 activation of innate immune response; GO:0002221 pattern recognition receptor signaling pathway; GO:0002224 toll-like receptor signaling pathway; GO:0002253 activation of immune response; GO:…	GO:0005576 extracellular region; GO:0005615 extracellular space; GO:0005622 intracellular; GO:0005623 cell; GO:0005737 cytoplasm; GO:0012505 endomembrane system; GO:0030141 secretory granule; GO:0031410 cytoplasmic vesicle; GO:0031982 vesicle; GO:0032991 protein-containing complex; GO:0042588 zymogen granule; GO:0043226 organelle; GO:0043227 membrane-bounded organelle; GO:0043229 intracellular or…	GO:0005488 binding; GO:0005515 protein binding; GO:0005539 glycosaminoglycan binding; GO:0019838 growth factor binding; GO:0030246 carbohydrate binding; GO:0042802 identical protein binding; GO:0042834 peptidoglycan binding; GO:0070492 oligosaccharide binding; GO:0097367 carbohydrate derivative binding;	PF00059	Lectin C-type domain	TV	KOG4297	C-type lectin
Q61646	Haptoglobin OS=Mus musculus OX=10090 GN=Hp PE=1 SV=1	Hp	5.0564	5.88805e-12	Up	38.752	49.9	15	15	0.428987	0.425603	0.420927	0.182287	0.198583	0.192898	0.19245	0.209035	2.17337	2.19414	2.1537	2.12165	2.10637	extracellular	K16142			GO:0000003 reproduction; GO:0000302 response to reactive oxygen species; GO:0001101 response to acid chemical; GO:0001666 response to hypoxia; GO:0001775 cell activation; GO:0001889 liver development; GO:0002237 response to molecule of bacterial origin; GO:0002252 immune effector process; GO:0002263 cell activation involved in immune response; GO:0002274 myeloid leukocyte activation; GO:0002275 m…	GO:0005576 extracellular region; GO:0005615 extracellular space; GO:0005622 intracellular; GO:0005623 cell; GO:0005737 cytoplasm; GO:0005783 endoplasmic reticulum; GO:0005794 Golgi apparatus; GO:0012505 endomembrane system; GO:0030139 endocytic vesicle; GO:0030141 secretory granule; GO:0031410 cytoplasmic vesicle; GO:0031838 haptoglobin-hemoglobin complex; GO:0031974 membrane-enclosed lumen; GO:0…	GO:0005488 binding; GO:0005515 protein binding; GO:0030492 hemoglobin binding; GO:0042802 identical protein binding; GO:0042803 protein homodimerization activity; GO:0046983 protein dimerization activity;	PF00089	Trypsin	E	KOG3627	Trypsin
P29788	Vitronectin OS=Mus musculus OX=10090 GN=Vtn PE=1 SV=2	Vtn	4.972	2.12838e-10	Up	54.848	35.1	13	13	0.382687	0.41572	0.389047	0.39189	0.391451	0.399247	0.40851	0.381485	1.95034	1.97798	1.99433	1.971	1.94632	extracellular	K06251	VTN; vitronectin	mmu05165 Human papillomavirus infection; mmu04610 Complement and coagulation cascades; mmu05205 Proteoglycans in cancer; mmu04151 PI3K-Akt signaling pathway; mmu04512 ECM-receptor interaction; mmu04510 Focal adhesion	GO:0001704 formation of primary germ layer; GO:0001706 endoderm formation; GO:0001889 liver development; GO:0001932 regulation of protein phosphorylation; GO:0001934 positive regulation of protein phosphorylation; GO:0002376 immune system process; GO:0002673 regulation of acute inflammatory response; GO:0002682 regulation of immune system process; GO:0002697 regulation of immune effector process;…	GO:0005576 extracellular region; GO:0005604 basement membrane; GO:0005615 extracellular space; GO:0005622 intracellular; GO:0005623 cell; GO:0005737 cytoplasm; GO:0005783 endoplasmic reticulum; GO:0005788 endoplasmic reticulum lumen; GO:0005791 rough endoplasmic reticulum; GO:0005794 Golgi apparatus; GO:0005796 Golgi lumen; GO:0005886 plasma membrane; GO:0012505 endomembrane system; GO:0016020 me…	GO:0005102 signaling receptor binding; GO:0005178 integrin binding; GO:0005488 binding; GO:0005515 protein binding; GO:0005518 collagen binding; GO:0005539 glycosaminoglycan binding; GO:0008201 heparin binding; GO:0042802 identical protein binding; GO:0043167 ion binding; GO:0043168 anion binding; GO:0044877 protein-containing complex binding; GO:0050839 cell adhesion molecule binding; GO:0050840…			OW	KOG1565	Gelatinase A and related matrix metalloproteases
P00688	Pancreatic alpha-amylase OS=Mus musculus OX=10090 GN=Amy2 PE=1 SV=2	Amy2	4.8466	0.000413705	Up	57.318	14	5	2	0.280817		0.384466	0.526172		0.54963	0.55766	0.640375	1.68519	1.28405	1.25302	1.66301	2.17561	extracellular	K01176	AMY; alpha-amylase [EC:3.2.1.1]	mmu04973 Carbohydrate digestion and absorption; mmu01100 Metabolic pathways; mmu00500 Starch and sucrose metabolism; mmu04970 Salivary secretion; mmu04972 Pancreatic secretion	GO:0005975 carbohydrate metabolic process; GO:0007586 digestion; GO:0008152 metabolic process; GO:0009056 catabolic process; GO:0009605 response to external stimulus; GO:0009607 response to biotic stimulus; GO:0009617 response to bacterium; GO:0016052 carbohydrate catabolic process; GO:0032501 multicellular organismal process; GO:0043207 response to external biotic stimulus; GO:0044238 primary me…	GO:0005576 extracellular region; GO:0005615 extracellular space;	GO:0003824 catalytic activity; GO:0004553 hydrolase activity, hydrolyzing O-glycosyl compounds; GO:0004556 alpha-amylase activity; GO:0005488 binding; GO:0005509 calcium ion binding; GO:0016160 amylase activity; GO:0016787 hydrolase activity; GO:0016798 hydrolase activity, acting on glycosyl bonds; GO:0031404 chloride ion binding; GO:0043167 ion binding; GO:0043168 anion binding; GO:0043169 catio…	PF00128; PF02806	Alpha amylase, catalytic domain; Alpha amylase, C-terminal all-beta domain	G	KOG2212	Alpha-amylase
P14602	Heat shock protein beta-1 OS=Mus musculus OX=10090 GN=Hspb1 PE=1 SV=3	Hspb1	4.782	1.02036e-09	Up	23.014	71.8	11	11	0.367012	0.355787	0.385409	0.608153	0.623187	0.608621	0.629223	0.590235	1.85817	1.76875	1.74413	1.73411	1.72721	mitochondria	K04455	HSPB1; heat shock protein beta-1	mmu04010 MAPK signaling pathway; mmu04370 VEGF signaling pathway; mmu05146 Amoebiasis	GO:0000003 reproduction; GO:0000302 response to reactive oxygen species; GO:0001101 response to acid chemical; GO:0001817 regulation of cytokine production; GO:0001819 positive regulation of cytokine production; GO:0001932 regulation of protein phosphorylation; GO:0001933 negative regulation of protein phosphorylation; GO:0002931 response to ischemia; GO:0006417 regulation of translation; GO:0006…	GO:0000502 proteasome complex; GO:0005622 intracellular; GO:0005623 cell; GO:0005634 nucleus; GO:0005737 cytoplasm; GO:0005829 cytosol; GO:0005856 cytoskeleton; GO:0005886 plasma membrane; GO:0014069 postsynaptic density; GO:0016020 membrane; GO:0030016 myofibril; GO:0030017 sarcomere; GO:0030018 Z disc; GO:0030424 axon; GO:0030425 dendrite; GO:0031430 M band; GO:0031672 A band; GO:0031674 I band…	GO:0004857 enzyme inhibitor activity; GO:0004860 protein kinase inhibitor activity; GO:0005080 protein kinase C binding; GO:0005488 binding; GO:0005515 protein binding; GO:0008426 protein kinase C inhibitor activity; GO:0019207 kinase regulator activity; GO:0019210 kinase inhibitor activity; GO:0019887 protein kinase regulator activity; GO:0019899 enzyme binding; GO:0019900 kinase binding; GO:001…			O	KOG3591	Alpha crystallins
Q9JM96	Cdc42 effector protein 4 OS=Mus musculus OX=10090 GN=Cdc42ep4 PE=1 SV=1	Cdc42ep4	4.5554	3.46482e-06	Up	37.869	19.5	4	4	0.349059	0.316035	0.480518	0.62802	0.683582	0.608443	0.6571	0.579398	1.79803	1.7824	1.69445	1.75553	1.66743	mitochondria				GO:0002376 immune system process; GO:0006950 response to stress; GO:0006952 defense response; GO:0006955 immune response; GO:0007154 cell communication; GO:0007165 signal transduction; GO:0007264 small GTPase mediated signal transduction; GO:0007265 Ras protein signal transduction; GO:0007266 Rho protein signal transduction; GO:0008064 regulation of actin polymerization or depolymerization; GO:00…	GO:0005622 intracellular; GO:0005623 cell; GO:0005737 cytoplasm; GO:0005856 cytoskeleton; GO:0005886 plasma membrane; GO:0005911 cell-cell junction; GO:0005912 adherens junction; GO:0012505 endomembrane system; GO:0015629 actin cytoskeleton; GO:0015630 microtubule cytoskeleton; GO:0016020 membrane; GO:0030054 cell junction; GO:0030139 endocytic vesicle; GO:0031410 cytoplasmic vesicle; GO:0031982 …	GO:0005096 GTPase activator activity; GO:0005488 binding; GO:0005515 protein binding; GO:0008047 enzyme activator activity; GO:0017016 Ras GTPase binding; GO:0017048 Rho GTPase binding; GO:0017049 GTP-Rho binding; GO:0019899 enzyme binding; GO:0030234 enzyme regulator activity; GO:0030695 GTPase regulator activity; GO:0031267 small GTPase binding; GO:0051020 GTPase binding; GO:0060589 nucleoside-…	PF00786	P21-Rho-binding domain
Q06890	Clusterin OS=Mus musculus OX=10090 GN=Clu PE=1 SV=1	Clu	4.4374	1.87381e-10	Up	51.655	31.7	11	11	0.402519	0.408839	0.413501	0.526014	0.542508	0.538156	0.56472	0.54516	1.86214	1.81652	1.83232	1.72798	1.81962	extracellular	K17252	CLU; clusterin	mmu04610 Complement and coagulation cascades	GO:0000003 reproduction; GO:0000902 cell morphogenesis; GO:0001505 regulation of neurotransmitter levels; GO:0001774 microglial cell activation; GO:0001775 cell activation; GO:0001817 regulation of cytokine production; GO:0001819 positive regulation of cytokine production; GO:0001836 release of cytochrome c from mitochondria; GO:0001932 regulation of protein phosphorylation; GO:0001934 positive r…	GO:0005576 extracellular region; GO:0005615 extracellular space; GO:0005622 intracellular; GO:0005623 cell; GO:0005634 nucleus; GO:0005737 cytoplasm; GO:0005739 mitochondrion; GO:0005783 endoplasmic reticulum; GO:0005788 endoplasmic reticulum lumen; GO:0005794 Golgi apparatus; GO:0009986 cell surface; GO:0012505 endomembrane system; GO:0016234 inclusion body; GO:0016235 aggresome; GO:0030141 secr…	GO:0001540 amyloid-beta binding; GO:0005102 signaling receptor binding; GO:0005488 binding; GO:0005515 protein binding; GO:0008092 cytoskeletal protein binding; GO:0019899 enzyme binding; GO:0031625 ubiquitin protein ligase binding; GO:0033218 amide binding; GO:0042277 peptide binding; GO:0044389 ubiquitin-like protein ligase binding; GO:0044877 protein-containing complex binding; GO:0046982 prot…
O35744	Chitinase-like protein 3 OS=Mus musculus OX=10090 GN=Chil3 PE=1 SV=2	Chil3	4.3296	3.3214e-12	Up	44.458	61.8	18	13	0.502692	0.499931	0.494824	0.135175	0.143207	0.142245	0.138687	0.13767	2.1939	2.16785	2.14908	2.11679	2.17794	extracellular	K17524			GO:0006022 aminoglycan metabolic process; GO:0006026 aminoglycan catabolic process; GO:0006030 chitin metabolic process; GO:0006032 chitin catabolic process; GO:0006040 amino sugar metabolic process; GO:0006807 nitrogen compound metabolic process; GO:0006950 response to stress; GO:0006952 defense response; GO:0006954 inflammatory response; GO:0008152 metabolic process; GO:0009056 catabolic proces…	GO:0005576 extracellular region; GO:0005622 intracellular; GO:0005623 cell; GO:0005634 nucleus; GO:0005635 nuclear envelope; GO:0005737 cytoplasm; GO:0005783 endoplasmic reticulum; GO:0005788 endoplasmic reticulum lumen; GO:0005791 rough endoplasmic reticulum; GO:0012505 endomembrane system; GO:0031410 cytoplasmic vesicle; GO:0031967 organelle envelope; GO:0031974 membrane-enclosed lumen; GO:0031…	GO:0003824 catalytic activity; GO:0004553 hydrolase activity, hydrolyzing O-glycosyl compounds; GO:0004563 beta-N-acetylhexosaminidase activity; GO:0004568 chitinase activity; GO:0005488 binding; GO:0008061 chitin binding; GO:0008144 drug binding; GO:0015929 hexosaminidase activity; GO:0016787 hydrolase activity; GO:0016798 hydrolase activity, acting on glycosyl bonds; GO:0030246 carbohydrate bin…	PF00704	Glycosyl hydrolases family 18	G	KOG2806	Chitinase
P97304	DNA-directed RNA polymerases I and III subunit RPAC2 OS=Mus musculus OX=10090 GN=Polr1d PE=1 SV=1	Polr1d	4.3082	0.000914772	Up	15.072	48.9	4	4	0.558729	0.253403		0.481146	0.47756	0.556168	0.443537	0.48231	1.57672	1.75703	1.79135	1.64555	1.97651	cytoplasm	K03020	RPC19; DNA-directed RNA polymerases I and III subunit RPAC2	mmu03020 RNA polymerase; mmu04623 Cytosolic DNA-sensing pathway		GO:0000428 DNA-directed RNA polymerase complex; GO:0005622 intracellular; GO:0005623 cell; GO:0005634 nucleus; GO:0005654 nucleoplasm; GO:0005666 RNA polymerase III complex; GO:0005730 nucleolus; GO:0005736 RNA polymerase I complex; GO:0030880 RNA polymerase complex; GO:0031974 membrane-enclosed lumen; GO:0031981 nuclear lumen; GO:0032991 protein-containing complex; GO:0043226 organelle; GO:00432…		PF13656	RNA polymerase Rpb3/Rpb11 dimerisation domain	K	KOG3438	DNA-directed RNA polymerase, subunit L
Q8BR63	Protein FAM177A1 OS=Mus musculus OX=10090 GN=Fam177a1 PE=1 SV=1	Fam177a1	4.2821	0.000153054	Up	23.578	12.1	2	2	0.362027		0.325654	0.469759			0.480726		1.45427	1.6838	1.47818	1.06938	1.67621	cytoplasm,nucleus
P70698	CTP synthase 1 OS=Mus musculus OX=10090 GN=Ctps1 PE=1 SV=2	Ctps1	4.2696	1.68782e-09	Up	66.682	52.8	23	21	0.44585	0.403765	0.415832	0.551731	0.5467	0.557288	0.548148	0.525867	1.83405	1.80035	1.74334	1.79212	1.83496	cytoplasm	K01937	pyrG; CTP synthase [EC:6.3.4.2]	mmu00240 Pyrimidine metabolism; mmu01100 Metabolic pathways; mmu01240 Biosynthesis of cofactors	GO:0001775 cell activation; GO:0002376 immune system process; GO:0006139 nucleobase-containing compound metabolic process; GO:0006213 pyrimidine nucleoside metabolic process; GO:0006220 pyrimidine nucleotide metabolic process; GO:0006221 pyrimidine nucleotide biosynthetic process; GO:0006241 CTP biosynthetic process; GO:0006725 cellular aromatic compound metabolic process; GO:0006753 nucleoside p…	GO:0005622 intracellular; GO:0005623 cell; GO:0005737 cytoplasm; GO:0005829 cytosol;	GO:0003824 catalytic activity; GO:0003883 CTP synthase activity; GO:0005488 binding; GO:0005515 protein binding; GO:0016874 ligase activity; GO:0016879 ligase activity, forming carbon-nitrogen bonds; GO:0042802 identical protein binding;	PF06418; PF00117	CTP synthase N-terminus; Glutamine amidotransferase class-I	F	KOG2387	CTP synthase (UTP-ammonia lyase)
Q61398	Procollagen C-endopeptidase enhancer 1 OS=Mus musculus OX=10090 GN=Pcolce PE=1 SV=2	Pcolce	4.2332	2.47602e-06	Up	50.167	17.3	6	6	0.333877	0.395526		0.820627	0.823076	0.394539	0.915313	0.597694	1.55827	1.53849	1.45206	1.49107	1.67946	nucleus				GO:0006508 proteolysis; GO:0006807 nitrogen compound metabolic process; GO:0007275 multicellular organism development; GO:0008152 metabolic process; GO:0009893 positive regulation of metabolic process; GO:0009987 cellular process; GO:0010033 response to organic substance; GO:0010604 positive regulation of macromolecule metabolic process; GO:0010952 positive regulation of peptidase activity; GO:00…	GO:0005576 extracellular region;	GO:0005488 binding; GO:0005518 collagen binding; GO:0005539 glycosaminoglycan binding; GO:0008047 enzyme activator activity; GO:0008201 heparin binding; GO:0016504 peptidase activator activity; GO:0030234 enzyme regulator activity; GO:0043167 ion binding; GO:0043168 anion binding; GO:0044877 protein-containing complex binding; GO:0061134 peptidase regulator activity; GO:0097367 carbohydrate deriv…	PF00431; PF01759	CUB domain; UNC-6/NTR/C345C module
P07214	SPARC OS=Mus musculus OX=10090 GN=Sparc PE=1 SV=1	Sparc	4.2256	2.01249e-05	Up	34.45	42.1	9	9	0.512271	0.403564	0.300298	0.658684	0.637508	0.675004	0.602119	0.645689	1.73411	1.63064	1.57556	1.92616	1.6984	extracellular	K24262			GO:0001101 response to acid chemical; GO:0001501 skeletal system development; GO:0001503 ossification; GO:0001936 regulation of endothelial cell proliferation; GO:0001937 negative regulation of endothelial cell proliferation; GO:0002237 response to molecule of bacterial origin; GO:0002576 platelet degranulation; GO:0006810 transport; GO:0006887 exocytosis; GO:0006897 endocytosis; GO:0006898 recep…	GO:0005576 extracellular region; GO:0005604 basement membrane; GO:0005615 extracellular space; GO:0005622 intracellular; GO:0005623 cell; GO:0005634 nucleus; GO:0005737 cytoplasm; GO:0009986 cell surface; GO:0012505 endomembrane system; GO:0012506 vesicle membrane; GO:0016020 membrane; GO:0016363 nuclear matrix; GO:0030139 endocytic vesicle; GO:0030141 secretory granule; GO:0030659 cytoplasmic ve…	GO:0005488 binding; GO:0005509 calcium ion binding; GO:0005518 collagen binding; GO:0043167 ion binding; GO:0043169 cation binding; GO:0044877 protein-containing complex binding; GO:0046872 metal ion binding; GO:0050840 extracellular matrix binding;	PF09289; PF00050; PF10591	Follistatin/Osteonectin-like EGF domain; Kazal-type serine protease inhibitor domain; Secreted protein acidic and rich in cysteine Ca binding region	W	KOG4004	Matricellular protein Osteonectin/SPARC/BM-40
Q8BMD8	Calcium-binding mitochondrial carrier protein SCaMC-1 OS=Mus musculus OX=10090 GN=Slc25a24 PE=1 SV=1	Slc25a24	4.1758	5.43627e-06	Up	52.901	34.9	13	13	0.390928	0.271019	0.403959	0.950504	0.850467	0.902631	0.944106	0.86809	1.47092	1.53528	1.50206	1.39602	1.51401	mitochondria	K14684			GO:0006810 transport; GO:0006811 ion transport; GO:0006820 anion transport; GO:0006839 mitochondrial transport; GO:0006855 drug transmembrane transport; GO:0006862 nucleotide transport; GO:0006950 response to stress; GO:0006979 response to oxidative stress; GO:0009987 cellular process; GO:0010035 response to inorganic substance; GO:0010038 response to metal ion; GO:0010941 regulation of cell deat…	GO:0005622 intracellular; GO:0005623 cell; GO:0005737 cytoplasm; GO:0005739 mitochondrion; GO:0005740 mitochondrial envelope; GO:0005743 mitochondrial inner membrane; GO:0016020 membrane; GO:0016021 integral component of membrane; GO:0019866 organelle inner membrane; GO:0031090 organelle membrane; GO:0031224 intrinsic component of membrane; GO:0031966 mitochondrial membrane; GO:0031967 organelle …	GO:0000295 adenine nucleotide transmembrane transporter activity; GO:0005215 transporter activity; GO:0005346 purine ribonucleotide transmembrane transporter activity; GO:0005347 ATP transmembrane transporter activity; GO:0005488 binding; GO:0005509 calcium ion binding; GO:0008509 anion transmembrane transporter activity; GO:0008514 organic anion transmembrane transporter activity; GO:0015075 ion…	PF13499	EF-hand domain pair	C	KOG0036	Predicted mitochondrial carrier protein
Q922F4	Tubulin beta-6 chain OS=Mus musculus OX=10090 GN=Tubb6 PE=1 SV=1	Tubb6	4.1758	3.70152e-07	Up	50.09	62.4	20	10	0.448319	0.396324	0.36235	0.632181	0.666833	0.703438	0.670108	0.720276	1.72506	1.8562	1.55767	1.63795	1.62329	cytoplasm,nucleus	K07375	TUBB; tubulin beta	mmu05020 Prion disease; mmu05016 Huntington disease; mmu05132 Salmonella infection; mmu05014 Amyotrophic lateral sclerosis; mmu05010 Alzheimer disease; mmu04540 Gap junction; mmu05022 Pathways of neurodegeneration - multiple diseases; mmu04145 Phagosome; mmu05012 Parkinson disease		GO:0005622 intracellular; GO:0005623 cell; GO:0005856 cytoskeleton; GO:0005874 microtubule; GO:0015630 microtubule cytoskeleton; GO:0043226 organelle; GO:0043228 non-membrane-bounded organelle; GO:0043229 intracellular organelle; GO:0043232 intracellular non-membrane-bounded organelle; GO:0099080 supramolecular complex; GO:0099081 supramolecular polymer; GO:0099512 supramolecular fiber; GO:009951…		PF00091; PF03953	Tubulin/FtsZ family, GTPase domain; Tubulin C-terminal domain	Z	KOG1375	Beta tubulin
O70456	14-3-3 protein sigma OS=Mus musculus OX=10090 GN=Sfn PE=1 SV=2	Sfn	4.1663	1.44535e-08	Up	27.706	46.4	11	9	0.420957	0.411408	0.39402	0.649319	0.664789	0.648326	0.685223	0.610129	1.85294	1.73164	1.65549	1.6201	1.65566	cytoplasm,nucleus	K06644	SFN; stratifin	mmu04960 Aldosterone-regulated sodium reabsorption; mmu04110 Cell cycle; mmu04115 p53 signaling pathway	GO:0000075 cell cycle checkpoint; GO:0000077 DNA damage checkpoint; GO:0000079 regulation of cyclin-dependent protein serine/threonine kinase activity; GO:0000278 mitotic cell cycle; GO:0001558 regulation of cell growth; GO:0001836 release of cytochrome c from mitochondria; GO:0001932 regulation of protein phosphorylation; GO:0001933 negative regulation of protein phosphorylation; GO:0002064 epit…	GO:0005576 extracellular region; GO:0005615 extracellular space; GO:0005622 intracellular; GO:0005623 cell; GO:0005634 nucleus; GO:0005737 cytoplasm; GO:0005829 cytosol; GO:0043226 organelle; GO:0043227 membrane-bounded organelle; GO:0043229 intracellular organelle; GO:0043231 intracellular membrane-bounded organelle;	GO:0004857 enzyme inhibitor activity; GO:0004860 protein kinase inhibitor activity; GO:0005488 binding; GO:0005515 protein binding; GO:0008426 protein kinase C inhibitor activity; GO:0019207 kinase regulator activity; GO:0019210 kinase inhibitor activity; GO:0019887 protein kinase regulator activity; GO:0019899 enzyme binding; GO:0019900 kinase binding; GO:0019901 protein kinase binding; GO:00302…	PF00244	14-3-3 protein	O	KOG0841	Multifunctional chaperone (14-3-3 family)
Q9EPT5	Solute carrier organic anion transporter family member 2A1 OS=Mus musculus OX=10090 GN=Slco2a1 PE=1 SV=2	Slco2a1	4.1361	4.00847e-05	Up	70.146	8.2	5	5	0.461761	0.358574	0.463583	0.576416	0.50354	0.485763	0.299606		1.47574	2.16701	1.44431	2.12559	1.63812	plasma membrane	K14345			GO:0006810 transport; GO:0006811 ion transport; GO:0006820 anion transport; GO:0006869 lipid transport; GO:0010876 lipid localization; GO:0015711 organic anion transport; GO:0015718 monocarboxylic acid transport; GO:0015732 prostaglandin transport; GO:0015849 organic acid transport; GO:0015908 fatty acid transport; GO:0033036 macromolecule localization; GO:0034220 ion transmembrane transport; GO:…	GO:0005623 cell; GO:0005886 plasma membrane; GO:0005887 integral component of plasma membrane; GO:0016020 membrane; GO:0016021 integral component of membrane; GO:0031224 intrinsic component of membrane; GO:0031226 intrinsic component of plasma membrane; GO:0071944 cell periphery;	GO:0005215 transporter activity; GO:0005319 lipid transporter activity; GO:0005342 organic acid transmembrane transporter activity; GO:0008028 monocarboxylic acid transmembrane transporter activity; GO:0008509 anion transmembrane transporter activity; GO:0008514 organic anion transmembrane transporter activity; GO:0015075 ion transmembrane transporter activity; GO:0015132 prostaglandin transmembr…	PF07648	Kazal-type serine protease inhibitor domain	Q	KOG3626	Organic anion transporter
P35831	Tyrosine-protein phosphatase non-receptor type 12 OS=Mus musculus OX=10090 GN=Ptpn12 PE=1 SV=3	Ptpn12	4.0403	1.54553e-05	Up	86.525	14.1	7	7	0.357031		0.385442	0.824361	0.737062	0.613064	0.680869	0.902658	1.47849	1.35199	1.33276	1.71163	1.62465	cytoplasm	K18024			GO:0006464 cellular protein modification process; GO:0006470 protein dephosphorylation; GO:0006793 phosphorus metabolic process; GO:0006796 phosphate-containing compound metabolic process; GO:0006807 nitrogen compound metabolic process; GO:0007154 cell communication; GO:0007165 signal transduction; GO:0007166 cell surface receptor signaling pathway; GO:0007167 enzyme linked receptor protein signa…	GO:0002102 podosome; GO:0005622 intracellular; GO:0005623 cell; GO:0005634 nucleus; GO:0005654 nucleoplasm; GO:0005737 cytoplasm; GO:0005829 cytosol; GO:0005856 cytoskeleton; GO:0015629 actin cytoskeleton; GO:0031974 membrane-enclosed lumen; GO:0031981 nuclear lumen; GO:0032991 protein-containing complex; GO:0043226 organelle; GO:0043227 membrane-bounded organelle; GO:0043228 non-membrane-bounded…	GO:0003824 catalytic activity; GO:0004721 phosphoprotein phosphatase activity; GO:0004725 protein tyrosine phosphatase activity; GO:0004726 non-membrane spanning protein tyrosine phosphatase activity; GO:0005488 binding; GO:0005515 protein binding; GO:0016787 hydrolase activity; GO:0016788 hydrolase activity, acting on ester bonds; GO:0016791 phosphatase activity; GO:0017124 SH3 domain binding; G…	PF00102	Protein-tyrosine phosphatase	T	KOG0789	Protein tyrosine phosphatase
Q91WL5	Cytochrome P450 4A12A OS=Mus musculus OX=10090 GN=Cyp4a12a PE=1 SV=2	Cyp4a12a	4.01	2.53144e-06	Up	58.349	36.4	15	6	0.423401	0.338619	0.289432	0.982314	0.9719	1.05405	0.912415	1.00058	1.42177	1.35452	1.43636	1.39479	1.41984	endoplasmic reticulum	K07425	CYP4A; long-chain fatty acid omega-monooxygenase [EC:1.14.14.80]	mmu00830 Retinol metabolism; mmu03320 PPAR signaling pathway; mmu04270 Vascular smooth muscle contraction; mmu01100 Metabolic pathways; mmu00071 Fatty acid degradation; mmu00590 Arachidonic acid metabolism; mmu04750 Inflammatory mediator regulation of TRP channels	GO:0001655 urogenital system development; GO:0001676 long-chain fatty acid metabolic process; GO:0001822 kidney development; GO:0001977 renal system process involved in regulation of blood volume; GO:0002933 lipid hydroxylation; GO:0003008 system process; GO:0003013 circulatory system process; GO:0003014 renal system process; GO:0003071 renal system process involved in regulation of systemic arte…	GO:0005576 extracellular region; GO:0005615 extracellular space; GO:0005622 intracellular; GO:0005623 cell; GO:0005737 cytoplasm; GO:0005783 endoplasmic reticulum; GO:0005789 endoplasmic reticulum membrane; GO:0005886 plasma membrane; GO:0012505 endomembrane system; GO:0016020 membrane; GO:0016324 apical plasma membrane; GO:0031090 organelle membrane; GO:0031984 organelle subcompartment; GO:00421…	GO:0003824 catalytic activity; GO:0004497 monooxygenase activity; GO:0008391 arachidonic acid monooxygenase activity; GO:0008392 arachidonic acid epoxygenase activity; GO:0016491 oxidoreductase activity; GO:0016614 oxidoreductase activity, acting on CH-OH group of donors; GO:0016616 oxidoreductase activity, acting on the CH-OH group of donors, NAD or NADP as acceptor; GO:0016705 oxidoreductase ac…	PF00067	Cytochrome P450	Q	KOG0157	Cytochrome P450 CYP4/CYP19/CYP26 subfamilies
Q9JIS8	Solute carrier family 12 member 4 OS=Mus musculus OX=10090 GN=Slc12a4 PE=1 SV=2	Slc12a4	3.9296	1.32603e-06	Up	120.62	8.3	8	5		0.404901	0.45348	0.58821	0.578887	0.475925	0.540845	0.525013	1.71446	1.79111	1.68868	1.69749	1.541	plasma membrane	K14427			GO:0006810 transport; GO:0006811 ion transport; GO:0006812 cation transport; GO:0006813 potassium ion transport; GO:0006820 anion transport; GO:0006821 chloride transport; GO:0006884 cell volume homeostasis; GO:0007154 cell communication; GO:0007267 cell-cell signaling; GO:0007268 chemical synaptic transmission; GO:0008361 regulation of cell size; GO:0009987 cellular process; GO:0015672 monovalen…	GO:0005623 cell; GO:0005886 plasma membrane; GO:0005887 integral component of plasma membrane; GO:0016020 membrane; GO:0016021 integral component of membrane; GO:0031224 intrinsic component of membrane; GO:0031226 intrinsic component of plasma membrane; GO:0071944 cell periphery;	GO:0005215 transporter activity; GO:0005488 binding; GO:0005515 protein binding; GO:0008324 cation transmembrane transporter activity; GO:0008509 anion transmembrane transporter activity; GO:0015075 ion transmembrane transporter activity; GO:0015077 monovalent inorganic cation transmembrane transporter activity; GO:0015079 potassium ion transmembrane transporter activity; GO:0015103 inorganic ani…			P	KOG2082	K+/Cl- cotransporter KCC1 and related transporters
Q9CYL5	Golgi-associated plant pathogenesis-related protein 1 OS=Mus musculus OX=10090 GN=Glipr2 PE=1 SV=3	Glipr2	3.9108	6.7003e-05	Up	17.09	27.9	3	3	0.373927	0.342955		0.951146	0.884994	0.844739	0.726859	0.866469	1.44859	1.08313	1.4538	1.59377	1.42962	cytoplasm				GO:0001932 regulation of protein phosphorylation; GO:0001934 positive regulation of protein phosphorylation; GO:0009893 positive regulation of metabolic process; GO:0009966 regulation of signal transduction; GO:0009967 positive regulation of signal transduction; GO:0010562 positive regulation of phosphorus metabolic process; GO:0010604 positive regulation of macromolecule metabolic process; GO:00…	GO:0000139 Golgi membrane; GO:0005622 intracellular; GO:0005623 cell; GO:0005737 cytoplasm; GO:0005794 Golgi apparatus; GO:0012505 endomembrane system; GO:0016020 membrane; GO:0031090 organelle membrane; GO:0031984 organelle subcompartment; GO:0043226 organelle; GO:0043227 membrane-bounded organelle; GO:0043229 intracellular organelle; GO:0043231 intracellular membrane-bounded organelle; GO:00985…	GO:0005488 binding; GO:0005515 protein binding; GO:0042802 identical protein binding; GO:0042803 protein homodimerization activity; GO:0046983 protein dimerization activity;	PF00188	Cysteine-rich secretory protein family	S	KOG3017	Defense-related protein containing SCP domain
O09049	Regenerating islet-derived protein 3-gamma OS=Mus musculus OX=10090 GN=Reg3g PE=1 SV=1	Reg3g	3.8978	1.5391e-09	Up	19.307	40.8	5	5	0.406154	0.39411	0.414541	0.81953	0.800913	0.792201	0.741687	0.739104	1.61889	1.59551	1.62304	1.4952	1.55912	extracellular				GO:0001906 cell killing; GO:0001932 regulation of protein phosphorylation; GO:0001934 positive regulation of protein phosphorylation; GO:0002218 activation of innate immune response; GO:0002221 pattern recognition receptor signaling pathway; GO:0002224 toll-like receptor signaling pathway; GO:0002253 activation of immune response; GO:0002376 immune system process; GO:0002682 regulation of immune …	GO:0005576 extracellular region; GO:0005615 extracellular space; GO:0005622 intracellular; GO:0005623 cell; GO:0005737 cytoplasm; GO:0012505 endomembrane system; GO:0030141 secretory granule; GO:0031410 cytoplasmic vesicle; GO:0031982 vesicle; GO:0032991 protein-containing complex; GO:0042588 zymogen granule; GO:0043226 organelle; GO:0043227 membrane-bounded organelle; GO:0043229 intracellular or…	GO:0005488 binding; GO:0005515 protein binding; GO:0005539 glycosaminoglycan binding; GO:0019838 growth factor binding; GO:0030246 carbohydrate binding; GO:0042802 identical protein binding; GO:0042834 peptidoglycan binding; GO:0070492 oligosaccharide binding; GO:0097367 carbohydrate derivative binding;	PF00059	Lectin C-type domain	TV	KOG4297	C-type lectin
Q8K224	RNA cytidine acetyltransferase OS=Mus musculus OX=10090 GN=Nat10 PE=1 SV=1	Nat10	3.895	0.00139975	Up	115.42	8	5	5		0.545713	0.248308	0.583933	0.624967	0.824116	0.815019	0.626177	1.59804	1.45209	1.32045	1.77052	1.59067	cytoplasm	K14521	NAT10; N-acetyltransferase 10 [EC:2.3.1.-]	mmu03008 Ribosome biogenesis in eukaryotes	GO:0000154 rRNA modification; GO:0002097 tRNA wobble base modification; GO:0002101 tRNA wobble cytosine modification; GO:0006139 nucleobase-containing compound metabolic process; GO:0006364 rRNA processing; GO:0006396 RNA processing; GO:0006399 tRNA metabolic process; GO:0006400 tRNA modification; GO:0006725 cellular aromatic compound metabolic process; GO:0006807 nitrogen compound metabolic proc…	GO:0005622 intracellular; GO:0005623 cell; GO:0005634 nucleus; GO:0005654 nucleoplasm; GO:0005697 telomerase holoenzyme complex; GO:0005730 nucleolus; GO:0030496 midbody; GO:0030684 preribosome; GO:0030686 90S preribosome; GO:0031974 membrane-enclosed lumen; GO:0031981 nuclear lumen; GO:0032991 protein-containing complex; GO:0043226 organelle; GO:0043227 membrane-bounded organelle; GO:0043228 non…	GO:0000049 tRNA binding; GO:0003676 nucleic acid binding; GO:0003723 RNA binding; GO:0003824 catalytic activity; GO:0005488 binding; GO:0005515 protein binding; GO:0008080 N-acetyltransferase activity; GO:0016407 acetyltransferase activity; GO:0016410 N-acyltransferase activity; GO:0016740 transferase activity; GO:0016746 transferase activity, transferring acyl groups; GO:0016747 transferase acti…	PF05127	Helicase	S	KOG2036	Predicted P-loop ATPase fused to an acetyltransferase
P15306	Thrombomodulin OS=Mus musculus OX=10090 GN=Thbd PE=1 SV=1	Thbd	3.8518	3.46429e-08	Up	61.867	9.7	4	4	0.404517	0.404636	0.43362	0.697488	0.705829	0.797505	0.771638	0.806619	1.64018	1.50834	1.69491	1.48954	1.64517	plasma membrane	K03907	THBD; thrombomodulin	mmu04610 Complement and coagulation cascades; mmu05418 Fluid shear stress and atherosclerosis; mmu04933 AGE-RAGE signaling pathway in diabetic complications	GO:0000003 reproduction; GO:0006950 response to stress; GO:0007154 cell communication; GO:0007165 signal transduction; GO:0007565 female pregnancy; GO:0007596 blood coagulation; GO:0007599 hemostasis; GO:0009611 response to wounding; GO:0009987 cellular process; GO:0010543 regulation of platelet activation; GO:0010544 negative regulation of platelet activation; GO:0022414 reproductive process; GO…	GO:0005576 extracellular region; GO:0005615 extracellular space; GO:0005622 intracellular; GO:0005623 cell; GO:0005737 cytoplasm; GO:0005773 vacuole; GO:0005774 vacuolar membrane; GO:0005886 plasma membrane; GO:0005887 integral component of plasma membrane; GO:0009986 cell surface; GO:0016020 membrane; GO:0016021 integral component of membrane; GO:0016327 apicolateral plasma membrane; GO:0031090 …	GO:0005488 binding; GO:0005509 calcium ion binding; GO:0038023 signaling receptor activity; GO:0043167 ion binding; GO:0043169 cation binding; GO:0046872 metal ion binding; GO:0060089 molecular transducer activity;	PF00059; PF07645; PF09064	Lectin C-type domain; Calcium-binding EGF domain; Thrombomodulin like fifth domain, EGF-like
P17918	Proliferating cell nuclear antigen OS=Mus musculus OX=10090 GN=Pcna PE=1 SV=2	Pcna	3.8445	2.58627e-06	Up	28.785	41.8	8	8	0.35245	0.44831	0.449879	0.777161	0.799987	0.710846	0.760538	0.687317	1.41988	1.54384	1.58534	1.80179	1.66266	cytoplasm	K04802	PCNA; proliferating cell nuclear antigen	mmu03430 Mismatch repair; mmu03030 DNA replication; mmu04110 Cell cycle; mmu05161 Hepatitis B; mmu03420 Nucleotide excision repair; mmu03410 Base excision repair; mmu04530 Tight junction	GO:0000003 reproduction; GO:0000075 cell cycle checkpoint; GO:0000077 DNA damage checkpoint; GO:0000082 G1/S transition of mitotic cell cycle; GO:0000083 regulation of transcription involved in G1/S transition of mitotic cell cycle; GO:0000122 negative regulation of transcription by RNA polymerase II; GO:0000278 mitotic cell cycle; GO:0000302 response to reactive oxygen species; GO:0000723 telome…	GO:0000228 nuclear chromosome; GO:0000307 cyclin-dependent protein kinase holoenzyme complex; GO:0005622 intracellular; GO:0005623 cell; GO:0005634 nucleus; GO:0005652 nuclear lamina; GO:0005654 nucleoplasm; GO:0005657 replication fork; GO:0005663 DNA replication factor C complex; GO:0005694 chromosome; GO:0005813 centrosome; GO:0005815 microtubule organizing center; GO:0005856 cytoskeleton; GO:0…	GO:0000700 mismatch base pair DNA N-glycosylase activity; GO:0000701 purine-specific mismatch base pair DNA N-glycosylase activity; GO:0003676 nucleic acid binding; GO:0003677 DNA binding; GO:0003682 chromatin binding; GO:0003684 damaged DNA binding; GO:0003690 double-stranded DNA binding; GO:0003824 catalytic activity; GO:0005102 signaling receptor binding; GO:0005488 binding; GO:0005515 protein…	PF00705; PF02747	Proliferating cell nuclear antigen, N-terminal domain; Proliferating cell nuclear antigen, C-terminal domain	L	KOG1636	DNA polymerase delta processivity factor (proliferating cell nuclear antigen)
Q62009	Periostin OS=Mus musculus OX=10090 GN=Postn PE=1 SV=2	Postn	3.7581	0.000109657	Up	93.142	11.3	5	5		0.302253	0.473004	0.890156	0.771401	0.820866	0.82875	0.629828	1.55336	1.43754	1.44695	1.46957	1.37631	endoplasmic reticulum				GO:0000902 cell morphogenesis; GO:0001501 skeletal system development; GO:0001817 regulation of cytokine production; GO:0001819 positive regulation of cytokine production; GO:0001952 regulation of cell-matrix adhesion; GO:0001953 negative regulation of cell-matrix adhesion; GO:0002791 regulation of peptide secretion; GO:0002793 positive regulation of peptide secretion; GO:0003008 system process; …	GO:0005576 extracellular region; GO:0005615 extracellular space; GO:0005622 intracellular; GO:0005623 cell; GO:0005737 cytoplasm; GO:0005794 Golgi apparatus; GO:0005802 trans-Golgi network; GO:0012505 endomembrane system; GO:0031012 extracellular matrix; GO:0031594 neuromuscular junction; GO:0031984 organelle subcompartment; GO:0043226 organelle; GO:0043227 membrane-bounded organelle; GO:0043229 …	GO:0005488 binding; GO:0005539 glycosaminoglycan binding; GO:0008201 heparin binding; GO:0043167 ion binding; GO:0043168 anion binding; GO:0043169 cation binding; GO:0046872 metal ion binding; GO:0097367 carbohydrate derivative binding; GO:1901681 sulfur compound binding;	PF02469	Fasciclin domain	MW	KOG1437	Fasciclin and related adhesion glycoproteins
P14069	Protein S100-A6 OS=Mus musculus OX=10090 GN=S100a6 PE=1 SV=3	S100a6	3.7257	1.36991e-05	Up	10.051	36	3	3	0.362211	0.369484	0.414509	0.902709	0.99315	0.938004	0.943698	0.958908	1.06473	1.47665	1.59718	1.55233	1.42644	cytoplasm	K23764			GO:0000902 cell morphogenesis; GO:0000904 cell morphogenesis involved in differentiation; GO:0006810 transport; GO:0006811 ion transport; GO:0007154 cell communication; GO:0007165 signal transduction; GO:0007275 multicellular organism development; GO:0007399 nervous system development; GO:0007409 axonogenesis; GO:0008284 positive regulation of cell population proliferation; GO:0009653 anatomical …	GO:0001726 ruffle; GO:0005622 intracellular; GO:0005623 cell; GO:0005634 nucleus; GO:0005635 nuclear envelope; GO:0005737 cytoplasm; GO:0005829 cytosol; GO:0005886 plasma membrane; GO:0009898 cytoplasmic side of plasma membrane; GO:0012505 endomembrane system; GO:0016020 membrane; GO:0019897 extrinsic component of plasma membrane; GO:0019898 extrinsic component of membrane; GO:0031234 extrinsic c…	GO:0005215 transporter activity; GO:0005488 binding; GO:0005509 calcium ion binding; GO:0005515 protein binding; GO:0005523 tropomyosin binding; GO:0008092 cytoskeletal protein binding; GO:0008270 zinc ion binding; GO:0015075 ion transmembrane transporter activity; GO:0022857 transmembrane transporter activity; GO:0042802 identical protein binding; GO:0042803 protein homodimerization activity; GO…	PF01023	S-100/ICaBP type calcium binding domain
Q148V8	Protein FAM83H OS=Mus musculus OX=10090 GN=Fam83h PE=1 SV=1	Fam83h	3.684	2.91301e-05	Up	131.11	12.1	9	9	0.501678		0.39561	0.537607	0.553104	0.507857	0.581894	0.658123	1.56423	1.65133	1.54248	1.59194	1.91414	nucleus	K23931			GO:0006996 organelle organization; GO:0007010 cytoskeleton organization; GO:0008104 protein localization; GO:0009987 cellular process; GO:0016043 cellular component organization; GO:0030334 regulation of cell migration; GO:0030335 positive regulation of cell migration; GO:0032879 regulation of localization; GO:0033036 macromolecule localization; GO:0033365 protein localization to organelle; GO:00…		GO:0005488 binding; GO:0005515 protein binding; GO:0019215 intermediate filament binding; GO:0019899 enzyme binding; GO:0019900 kinase binding; GO:0019901 protein kinase binding; GO:0044877 protein-containing complex binding; GO:1990254 keratin filament binding;
P62500	TSC22 domain family protein 1 OS=Mus musculus OX=10090 GN=Tsc22d1 PE=1 SV=2	Tsc22d1	3.6751	5.79311e-10	Up	109.81	6	3	3	0.45115	0.461888	0.479651	0.612845	0.640703	0.607673	0.581711	0.633902	1.70929	1.70754	1.65663	1.694	1.76301	nucleus				GO:0006139 nucleobase-containing compound metabolic process; GO:0006351 transcription, DNA-templated; GO:0006355 regulation of transcription, DNA-templated; GO:0006357 regulation of transcription by RNA polymerase II; GO:0006366 transcription by RNA polymerase II; GO:0006725 cellular aromatic compound metabolic process; GO:0006807 nitrogen compound metabolic process; GO:0008152 metabolic process;…	GO:0005622 intracellular; GO:0005623 cell; GO:0005634 nucleus; GO:0005737 cytoplasm; GO:0043226 organelle; GO:0043227 membrane-bounded organelle; GO:0043229 intracellular organelle; GO:0043231 intracellular membrane-bounded organelle;	GO:0000976 transcription regulatory region sequence-specific DNA binding; GO:0000977 RNA polymerase II transcription regulatory region sequence-specific DNA binding; GO:0000978 RNA polymerase II cis-regulatory region sequence-specific DNA binding; GO:0000981 DNA-binding transcription factor activity, RNA polymerase II-specific; GO:0000987 cis-regulatory region sequence-specific DNA binding; GO:00…			K	KOG4797	Transcriptional regulator
Q9R0E1	Multifunctional procollagen lysine hydroxylase and glycosyltransferase LH3 OS=Mus musculus OX=10090 GN=Plod3 PE=1 SV=1	Plod3	3.6127	1.64936e-06	Up	84.921	21.3	11	11	0.510778	0.38956	0.406062	0.782275	0.743062	0.796532	0.838678	0.666982	1.55893	1.43567	1.6486	1.6447	1.57818	endoplasmic reticulum	K13646	PLOD3; lysyl hydroxylase/galactosyltransferase/glucosyltransferase [EC:1.14.11.4 2.4.1.50 2.4.1.66]	mmu00310 Lysine degradation; mmu00514 Other types of O-glycan biosynthesis; mmu01100 Metabolic pathways	GO:0000902 cell morphogenesis; GO:0000904 cell morphogenesis involved in differentiation; GO:0001701 in utero embryonic development; GO:0001885 endothelial cell development; GO:0001886 endothelial cell morphogenesis; GO:0002009 morphogenesis of an epithelium; GO:0002064 epithelial cell development; GO:0003008 system process; GO:0003013 circulatory system process; GO:0003018 vascular process in ci…	GO:0005576 extracellular region; GO:0005622 intracellular; GO:0005623 cell; GO:0005737 cytoplasm; GO:0005783 endoplasmic reticulum; GO:0005789 endoplasmic reticulum membrane; GO:0005791 rough endoplasmic reticulum; GO:0005794 Golgi apparatus; GO:0005802 trans-Golgi network; GO:0012505 endomembrane system; GO:0016020 membrane; GO:0030867 rough endoplasmic reticulum membrane; GO:0031012 extracellul…	GO:0003824 catalytic activity; GO:0008194 UDP-glycosyltransferase activity; GO:0008378 galactosyltransferase activity; GO:0008475 procollagen-lysine 5-dioxygenase activity; GO:0016491 oxidoreductase activity; GO:0016705 oxidoreductase activity, acting on paired donors, with incorporation or reduction of molecular oxygen; GO:0016706 2-oxoglutarate-dependent dioxygenase activity; GO:0016740 transfe…	PF03171	2OG-Fe(II) oxygenase superfamily	O	KOG1971	Lysyl hydroxylase
P11276	Fibronectin OS=Mus musculus OX=10090 GN=Fn1 PE=1 SV=4	Fn1	3.5673	3.22893e-11	Up	272.53	58.7	94	94	0.49341	0.48741	0.503774	0.528413	0.538015	0.544396	0.540265	0.537609	1.78814	1.78383	1.75334	1.7258	1.7756	extracellular	K05717	FN1; fibronectin 1	mmu05165 Human papillomavirus infection; mmu04810 Regulation of actin cytoskeleton; mmu05146 Amoebiasis; mmu04510 Focal adhesion; mmu04933 AGE-RAGE signaling pathway in diabetic complications; mmu05135 Yersinia infection; mmu04151 PI3K-Akt signaling pathway; mmu05205 Proteoglycans in cancer; mmu04512 ECM-receptor interaction; mmu05100 Bacterial invasion of epithelial cells; mmu05222 Small cell lu…	GO:0000302 response to reactive oxygen species; GO:0000902 cell morphogenesis; GO:0000904 cell morphogenesis involved in differentiation; GO:0001101 response to acid chemical; GO:0001503 ossification; GO:0001558 regulation of cell growth; GO:0001667 ameboidal-type cell migration; GO:0001678 cellular glucose homeostasis; GO:0001704 formation of primary germ layer; GO:0001706 endoderm formation; GO…	GO:0005576 extracellular region; GO:0005577 fibrinogen complex; GO:0005604 basement membrane; GO:0005615 extracellular space; GO:0005622 intracellular; GO:0005623 cell; GO:0005737 cytoplasm; GO:0005783 endoplasmic reticulum; GO:0005788 endoplasmic reticulum lumen; GO:0005793 endoplasmic reticulum-Golgi intermediate compartment; GO:0005886 plasma membrane; GO:0012505 endomembrane system; GO:001602…	GO:0002020 protease binding; GO:0005102 signaling receptor binding; GO:0005178 integrin binding; GO:0005198 structural molecule activity; GO:0005201 extracellular matrix structural constituent; GO:0005488 binding; GO:0005515 protein binding; GO:0005518 collagen binding; GO:0005539 glycosaminoglycan binding; GO:0008022 protein C-terminus binding; GO:0008047 enzyme activator activity; GO:0008201 he…	PF00039; PF00040; PF00041	Fibronectin type I domain; Fibronectin type II domain; Fibronectin type III domain
Q60590	Alpha-1-acid glycoprotein 1 OS=Mus musculus OX=10090 GN=Orm1 PE=1 SV=1	Orm1	3.5592	4.38771e-09	Up	23.895	24.6	4	2	0.548452	0.580884	0.579522	0.194629	0.23191	0.265317	0.239311	0.223046	2.03308	2.09103	1.99429	1.9222	2.09633	extracellular	K17308			GO:0001101 response to acid chemical; GO:0001775 cell activation; GO:0001817 regulation of cytokine production; GO:0001818 negative regulation of cytokine production; GO:0001819 positive regulation of cytokine production; GO:0002237 response to molecule of bacterial origin; GO:0002252 immune effector process; GO:0002263 cell activation involved in immune response; GO:0002274 myeloid leukocyte act…	GO:0000323 lytic vacuole; GO:0005576 extracellular region; GO:0005615 extracellular space; GO:0005622 intracellular; GO:0005623 cell; GO:0005737 cytoplasm; GO:0005764 lysosome; GO:0005766 primary lysosome; GO:0005773 vacuole; GO:0005775 vacuolar lumen; GO:0012505 endomembrane system; GO:0030141 secretory granule; GO:0031091 platelet alpha granule; GO:0031093 platelet alpha granule lumen; GO:00314…	GO:0005488 binding; GO:0008144 drug binding;	PF00061	Lipocalin / cytosolic fatty-acid binding protein family
P54869	Hydroxymethylglutaryl-CoA synthase, mitochondrial OS=Mus musculus OX=10090 GN=Hmgcs2 PE=1 SV=2	Hmgcs2	3.5041	9.9455e-07	Up	56.822	50.2	17	16	0.490681	0.597037	0.643825	0.233475	0.255893	0.227264	0.261381	0.177977	2.11399	1.95064	2.0788	1.96097	2.00807	mitochondria	K01641	E2.3.3.10; hydroxymethylglutaryl-CoA synthase [EC:2.3.3.10]	mmu00650 Butanoate metabolism; mmu00900 Terpenoid backbone biosynthesis; mmu03320 PPAR signaling pathway; mmu01100 Metabolic pathways; mmu00072 Synthesis and degradation of ketone bodies; mmu00280 Valine, leucine and isoleucine degradation	GO:0001101 response to acid chemical; GO:0001655 urogenital system development; GO:0001822 kidney development; GO:0001889 liver development; GO:0002237 response to molecule of bacterial origin; GO:0006091 generation of precursor metabolites and energy; GO:0006950 response to stress; GO:0007275 multicellular organism development; GO:0007399 nervous system development; GO:0007417 central nervous sy…	GO:0005622 intracellular; GO:0005623 cell; GO:0005737 cytoplasm; GO:0005739 mitochondrion; GO:0005759 mitochondrial matrix; GO:0031974 membrane-enclosed lumen; GO:0043226 organelle; GO:0043227 membrane-bounded organelle; GO:0043229 intracellular organelle; GO:0043231 intracellular membrane-bounded organelle; GO:0043233 organelle lumen; GO:0070013 intracellular organelle lumen;	GO:0003824 catalytic activity; GO:0004421 hydroxymethylglutaryl-CoA synthase activity; GO:0016740 transferase activity; GO:0016746 transferase activity, transferring acyl groups; GO:0046912 transferase activity, transferring acyl groups, acyl groups converted into alkyl on transfer;	PF01154; PF08540	Hydroxymethylglutaryl-coenzyme A synthase N terminal; Hydroxymethylglutaryl-coenzyme A synthase C terminal	I	KOG1393	Hydroxymethylglutaryl-CoA synthase
P16110	Galectin-3 OS=Mus musculus OX=10090 GN=Lgals3 PE=1 SV=3	Lgals3	3.479	4.16323e-08	Up	27.515	31.4	8	8	0.489643	0.430295	0.429216	0.75712	0.760425	0.768286	0.770208	0.771893	1.5099	1.52497	1.61462	1.60728	1.56614	cytoplasm	K06831			GO:0001501 skeletal system development; GO:0001775 cell activation; GO:0001906 cell killing; GO:0002252 immune effector process; GO:0002263 cell activation involved in immune response; GO:0002274 myeloid leukocyte activation; GO:0002275 myeloid cell activation involved in immune response; GO:0002283 neutrophil activation involved in immune response; GO:0002366 leukocyte activation involved in imm…	GO:0001772 immunological synapse; GO:0005576 extracellular region; GO:0005615 extracellular space; GO:0005622 intracellular; GO:0005623 cell; GO:0005634 nucleus; GO:0005737 cytoplasm; GO:0005739 mitochondrion; GO:0005740 mitochondrial envelope; GO:0005743 mitochondrial inner membrane; GO:0005886 plasma membrane; GO:0009897 external side of plasma membrane; GO:0009986 cell surface; GO:0012505 endo…	GO:0005102 signaling receptor binding; GO:0005488 binding; GO:0005515 protein binding; GO:0019863 IgE binding; GO:0019865 immunoglobulin binding; GO:0030246 carbohydrate binding; GO:0030545 receptor regulator activity; GO:0034987 immunoglobulin receptor binding; GO:0034988 Fc-gamma receptor I complex binding; GO:0036094 small molecule binding; GO:0038023 signaling receptor activity; GO:0042056 ch…	PF00337	Galactoside-binding lectin	W	KOG3587	Galectin, galactose-binding lectin
P06869	Urokinase-type plasminogen activator OS=Mus musculus OX=10090 GN=Plau PE=1 SV=1	Plau	3.4749	5.02648e-07	Up	48.267	43.2	15	15	0.540419	0.48567	0.420224	0.627056	0.64518	0.61209	0.640555	0.652407	1.6402	1.63235	1.71098	1.73367	1.65919	extracellular	K01348	PLAU; urokinase plasminogen activator [EC:3.4.21.73]	mmu05206 MicroRNAs in cancer; mmu04064 NF-kappa B signaling pathway; mmu04610 Complement and coagulation cascades; mmu05205 Proteoglycans in cancer; mmu05215 Prostate cancer; mmu05202 Transcriptional misregulation in cancer	GO:0000003 reproduction; GO:0001525 angiogenesis; GO:0001568 blood vessel development; GO:0001666 response to hypoxia; GO:0001678 cellular glucose homeostasis; GO:0001775 cell activation; GO:0001944 vasculature development; GO:0001952 regulation of cell-matrix adhesion; GO:0002237 response to molecule of bacterial origin; GO:0002252 immune effector process; GO:0002263 cell activation involved in …	GO:0005576 extracellular region; GO:0005615 extracellular space; GO:0005622 intracellular; GO:0005623 cell; GO:0005737 cytoplasm; GO:0005886 plasma membrane; GO:0009986 cell surface; GO:0012505 endomembrane system; GO:0012506 vesicle membrane; GO:0016020 membrane; GO:0030141 secretory granule; GO:0030659 cytoplasmic vesicle membrane; GO:0030667 secretory granule membrane; GO:0031090 organelle mem…	GO:0003824 catalytic activity; GO:0004175 endopeptidase activity; GO:0004252 serine-type endopeptidase activity; GO:0008233 peptidase activity; GO:0008236 serine-type peptidase activity; GO:0016787 hydrolase activity; GO:0017171 serine hydrolase activity; GO:0070011 peptidase activity, acting on L-amino acid peptides; GO:0140096 catalytic activity, acting on a protein;	PF00051; PF00089	Kringle domain; Trypsin
Q91VU7	Pseudouridylate synthase 7 homolog OS=Mus musculus OX=10090 GN=Pus7 PE=2 SV=2	Pus7	3.4285	2.97709e-05	Up	74.792	14.5	6	6	0.383347	0.487255	0.444119	0.920267	0.566344	0.730554	0.841508	1.11402	1.6431	1.3526	1.62755	1.71817	1.17117	cytoplasm	K06176			GO:0001522 pseudouridine synthesis; GO:0002682 regulation of immune system process; GO:0006139 nucleobase-containing compound metabolic process; GO:0006396 RNA processing; GO:0006399 tRNA metabolic process; GO:0006400 tRNA modification; GO:0006417 regulation of translation; GO:0006725 cellular aromatic compound metabolic process; GO:0006807 nitrogen compound metabolic process; GO:0008033 tRNA pro…	GO:0005622 intracellular; GO:0005623 cell; GO:0005634 nucleus; GO:0043226 organelle; GO:0043227 membrane-bounded organelle; GO:0043229 intracellular organelle; GO:0043231 intracellular membrane-bounded organelle;	GO:0003824 catalytic activity; GO:0005488 binding; GO:0005515 protein binding; GO:0009982 pseudouridine synthase activity; GO:0016853 isomerase activity; GO:0016866 intramolecular transferase activity; GO:0019899 enzyme binding;			S	KOG2339	Uncharacterized conserved protein
P97821	Dipeptidyl peptidase 1 OS=Mus musculus OX=10090 GN=Ctsc PE=1 SV=1	Ctsc	3.4147	7.54348e-07	Up	52.376	31.8	9	9	0.474415	0.389909	0.384661	0.994742	0.902198	0.879864	0.947569	0.918424	1.42751	1.47729	1.31624	1.50148	1.3857	extracellular	K01275	CTSC; cathepsin C [EC:3.4.14.1]	mmu04210 Apoptosis; mmu04142 Lysosome	GO:0001775 cell activation; GO:0001906 cell killing; GO:0001909 leukocyte mediated cytotoxicity; GO:0001913 T cell mediated cytotoxicity; GO:0002250 adaptive immune response; GO:0002252 immune effector process; GO:0002263 cell activation involved in immune response; GO:0002274 myeloid leukocyte activation; GO:0002275 myeloid cell activation involved in immune response; GO:0002283 neutrophil activ…	GO:0000323 lytic vacuole; GO:0005576 extracellular region; GO:0005615 extracellular space; GO:0005622 intracellular; GO:0005623 cell; GO:0005634 nucleus; GO:0005654 nucleoplasm; GO:0005737 cytoplasm; GO:0005764 lysosome; GO:0005766 primary lysosome; GO:0005773 vacuole; GO:0005775 vacuolar lumen; GO:0005783 endoplasmic reticulum; GO:0005788 endoplasmic reticulum lumen; GO:0005793 endoplasmic retic…	GO:0003824 catalytic activity; GO:0004175 endopeptidase activity; GO:0004197 cysteine-type endopeptidase activity; GO:0004252 serine-type endopeptidase activity; GO:0005488 binding; GO:0005515 protein binding; GO:0008047 enzyme activator activity; GO:0008233 peptidase activity; GO:0008234 cysteine-type peptidase activity; GO:0008236 serine-type peptidase activity; GO:0016504 peptidase activator a…	PF08773; PF00112	Cathepsin C exclusion domain; Papain family cysteine protease	O	KOG1543	Cysteine proteinase Cathepsin L
O35114	Lysosome membrane protein 2 OS=Mus musculus OX=10090 GN=Scarb2 PE=1 SV=3	Scarb2	3.4121	4.56326e-07	Up	54.043	22.4	8	8	0.489569	0.396009	0.467209	0.793324	0.758722	0.816641	0.803	0.782526	1.54734	1.62892	1.5306	1.44018	1.54596	plasma membrane	K12384	SCARB2; lysosome membrane protein 2	mmu04142 Lysosome	GO:0001508 action potential; GO:0002532 production of molecular mediator involved in inflammatory response; GO:0002831 regulation of response to biotic stimulus; GO:0006082 organic acid metabolic process; GO:0006605 protein targeting; GO:0006622 protein targeting to lysosome; GO:0006623 protein targeting to vacuole; GO:0006629 lipid metabolic process; GO:0006631 fatty acid metabolic process; GO:0…	GO:0000139 Golgi membrane; GO:0000323 lytic vacuole; GO:0005622 intracellular; GO:0005623 cell; GO:0005737 cytoplasm; GO:0005764 lysosome; GO:0005765 lysosomal membrane; GO:0005768 endosome; GO:0005770 late endosome; GO:0005773 vacuole; GO:0005774 vacuolar membrane; GO:0005775 vacuolar lumen; GO:0005783 endoplasmic reticulum; GO:0005789 endoplasmic reticulum membrane; GO:0005794 Golgi apparatus; …	GO:0004888 transmembrane signaling receptor activity; GO:0005044 scavenger receptor activity; GO:0005488 binding; GO:0005515 protein binding; GO:0019899 enzyme binding; GO:0038023 signaling receptor activity; GO:0038024 cargo receptor activity; GO:0060089 molecular transducer activity;			T	KOG3776	Plasma membrane glycoprotein CD36 and related membrane receptors
Q00519	Xanthine dehydrogenase/oxidase OS=Mus musculus OX=10090 GN=Xdh PE=1 SV=5	Xdh	3.3774	1.30462e-10	Up	146.56	39.4	32	31	0.509169	0.485687	0.508067	0.603783	0.603023	0.614005	0.620502	0.595842	1.66263	1.7175	1.67786	1.70127	1.70066	cytoplasm	K00106	XDH; xanthine dehydrogenase/oxidase [EC:1.17.1.4 1.17.3.2]	mmu04146 Peroxisome; mmu00232 Caffeine metabolism; mmu01100 Metabolic pathways; mmu00983 Drug metabolism - other enzymes; mmu00230 Purine metabolism	GO:0000302 response to reactive oxygen species; GO:0001932 regulation of protein phosphorylation; GO:0001933 negative regulation of protein phosphorylation; GO:0001934 positive regulation of protein phosphorylation; GO:0001936 regulation of endothelial cell proliferation; GO:0001937 negative regulation of endothelial cell proliferation; GO:0002237 response to molecule of bacterial origin; GO:0006…	GO:0002197 xanthine dehydrogenase complex; GO:0005576 extracellular region; GO:0005615 extracellular space; GO:0005622 intracellular; GO:0005623 cell; GO:0005737 cytoplasm; GO:0005777 peroxisome; GO:0005783 endoplasmic reticulum; GO:0005829 cytosol; GO:0012505 endomembrane system; GO:0016528 sarcoplasm; GO:0016529 sarcoplasmic reticulum; GO:0032991 protein-containing complex; GO:0042579 microbody…	GO:0000166 nucleotide binding; GO:0003824 catalytic activity; GO:0004854 xanthine dehydrogenase activity; GO:0004855 xanthine oxidase activity; GO:0005488 binding; GO:0005515 protein binding; GO:0016491 oxidoreductase activity; GO:0016661 oxidoreductase activity, acting on other nitrogenous compounds as donors; GO:0016662 oxidoreductase activity, acting on other nitrogenous compounds as donors, c…	PF00111; PF01799; PF03450; PF01315	2Fe-2S iron-sulfur cluster binding domain; [2Fe-2S] binding domain; CO dehydrogenase flavoprotein C-terminal domain; Aldehyde oxidase and xanthine dehydrogenase, a/b hammerhead domain	F	KOG0430	Xanthine dehydrogenase
Q8BND5	Sulfhydryl oxidase 1 OS=Mus musculus OX=10090 GN=Qsox1 PE=1 SV=1	Qsox1	3.3749	2.33764e-06	Up	82.784	16.8	10	10	0.614566	0.48091	0.466335	0.511695	0.4776	0.688974	0.464915	0.510175	1.72983	1.85434	1.8398	1.71378	1.64707	Golgi apparatus	K10758			GO:0001775 cell activation; GO:0002252 immune effector process; GO:0002263 cell activation involved in immune response; GO:0002274 myeloid leukocyte activation; GO:0002275 myeloid cell activation involved in immune response; GO:0002283 neutrophil activation involved in immune response; GO:0002366 leukocyte activation involved in immune response; GO:0002376 immune system process; GO:0002443 leukoc…	GO:0000139 Golgi membrane; GO:0005576 extracellular region; GO:0005615 extracellular space; GO:0005622 intracellular; GO:0005623 cell; GO:0005737 cytoplasm; GO:0005783 endoplasmic reticulum; GO:0005788 endoplasmic reticulum lumen; GO:0005794 Golgi apparatus; GO:0012505 endomembrane system; GO:0016020 membrane; GO:0016021 integral component of membrane; GO:0030141 secretory granule; GO:0030173 int…	GO:0003756 protein disulfide isomerase activity; GO:0003824 catalytic activity; GO:0016491 oxidoreductase activity; GO:0016667 oxidoreductase activity, acting on a sulfur group of donors; GO:0016670 oxidoreductase activity, acting on a sulfur group of donors, oxygen as acceptor; GO:0016853 isomerase activity; GO:0016860 intramolecular oxidoreductase activity; GO:0016864 intramolecular oxidoreduct…	PF00085	Thioredoxin	D	KOG1731	FAD-dependent sulfhydryl oxidase/quiescin and related proteins
Q9JJ00	Phospholipid scramblase 1 OS=Mus musculus OX=10090 GN=Plscr1 PE=1 SV=1	Plscr1	3.3659	9.82865e-05	Up	35.914	12.2	3	3	0.511695	0.337441	0.50662	0.741645	0.556298	0.740727			1.36557	1.62623	1.86957	1.46529	1.27892	cytoplasm				GO:0002237 response to molecule of bacterial origin; GO:0002252 immune effector process; GO:0002376 immune system process; GO:0002520 immune system development; GO:0002526 acute inflammatory response; GO:0002682 regulation of immune system process; GO:0002684 positive regulation of immune system process; GO:0002694 regulation of leukocyte activation; GO:0006139 nucleobase-containing compound meta…	GO:0005576 extracellular region; GO:0005622 intracellular; GO:0005623 cell; GO:0005634 nucleus; GO:0005730 nucleolus; GO:0005737 cytoplasm; GO:0005794 Golgi apparatus; GO:0005829 cytosol; GO:0005886 plasma membrane; GO:0005887 integral component of plasma membrane; GO:0012505 endomembrane system; GO:0016020 membrane; GO:0016021 integral component of membrane; GO:0031012 extracellular matrix; GO:0…	GO:0000981 DNA-binding transcription factor activity, RNA polymerase II-specific; GO:0001228 DNA-binding transcription activator activity, RNA polymerase II-specific; GO:0003700 DNA-binding transcription factor activity; GO:0005102 signaling receptor binding; GO:0005154 epidermal growth factor receptor binding; GO:0005215 transporter activity; GO:0005319 lipid transporter activity; GO:0005488 bin…	PF03803	Scramblase	M	KOG0621	Phospholipid scramblase
Q8C6B2	Rhotekin OS=Mus musculus OX=10090 GN=Rtkn PE=1 SV=3	Rtkn	3.3565	9.12714e-05	Up	63.012	27	9	9	0.384308	0.54515	0.666223	0.504947	0.464018	0.567978	0.455984	0.484816	1.70681	1.55238	1.83472	1.75699	2.07568	mitochondria	K24024			GO:0007154 cell communication; GO:0007165 signal transduction; GO:0007264 small GTPase mediated signal transduction; GO:0007265 Ras protein signal transduction; GO:0007266 Rho protein signal transduction; GO:0009987 cellular process; GO:0010941 regulation of cell death; GO:0023052 signaling; GO:0034260 negative regulation of GTPase activity; GO:0035556 intracellular signal transduction; GO:004298…	GO:0005622 intracellular; GO:0005623 cell; GO:0005737 cytoplasm; GO:0005829 cytosol;	GO:0004857 enzyme inhibitor activity; GO:0005095 GTPase inhibitor activity; GO:0005488 binding; GO:0005515 protein binding; GO:0017016 Ras GTPase binding; GO:0017048 Rho GTPase binding; GO:0017049 GTP-Rho binding; GO:0019899 enzyme binding; GO:0030234 enzyme regulator activity; GO:0030695 GTPase regulator activity; GO:0031267 small GTPase binding; GO:0051020 GTPase binding; GO:0060589 nucleoside-…	PF08174	Cell division protein anillin
P11859	Angiotensinogen OS=Mus musculus OX=10090 GN=Agt PE=1 SV=1	Agt	3.3105	1.22351e-07	Up	51.99	29.6	10	10	0.470128	0.515981	0.568322	0.595887	0.610069	0.578711	0.593191	0.491174	1.74261	1.71424	1.68478	1.76141	1.6735	extracellular	K09821	AGT; angiotensinogen	mmu04080 Neuroactive ligand-receptor interaction; mmu05414 Dilated cardiomyopathy; mmu04931 Insulin resistance; mmu04270 Vascular smooth muscle contraction; mmu04614 Renin-angiotensin system; mmu04933 AGE-RAGE signaling pathway in diabetic complications; mmu04934 Cushing syndrome; mmu04261 Adrenergic signaling in cardiomyocytes; mmu04927 Cortisol synthesis and secretion; mmu04924 Renin secretion;…	GO:0000003 reproduction; GO:0000165 MAPK cascade; GO:0001505 regulation of neurotransmitter levels; GO:0001542 ovulation from ovarian follicle; GO:0001543 ovarian follicle rupture; GO:0001558 regulation of cell growth; GO:0001568 blood vessel development; GO:0001655 urogenital system development; GO:0001657 ureteric bud development; GO:0001658 branching involved in ureteric bud morphogenesis; GO:…	GO:0005576 extracellular region; GO:0005615 extracellular space; GO:0005622 intracellular; GO:0005623 cell; GO:0005737 cytoplasm; GO:0005829 cytosol;	GO:0001664 G protein-coupled receptor binding; GO:0004857 enzyme inhibitor activity; GO:0004866 endopeptidase inhibitor activity; GO:0004867 serine-type endopeptidase inhibitor activity; GO:0005102 signaling receptor binding; GO:0005179 hormone activity; GO:0005488 binding; GO:0005515 protein binding; GO:0008047 enzyme activator activity; GO:0008083 growth factor activity; GO:0016176 superoxide-g…	PF00079	Serpin (serine protease inhibitor)	V	KOG2392	Serpin
O35945	Aldehyde dehydrogenase, cytosolic 1 OS=Mus musculus OX=10090 GN=Aldh1a7 PE=1 SV=1	Aldh1a7	3.1762	1.9593e-08	Up	54.587	47.9	20	11	0.560328	0.50682	0.544068	0.590159	0.552939	0.562645	0.539073	0.614729	1.69006	1.78789	1.68731	1.63108	1.7329	cytoplasm	K07249	ALDH1A; retinal dehydrogenase [EC:1.2.1.36]	mmu00830 Retinol metabolism; mmu01100 Metabolic pathways	GO:0001523 retinoid metabolic process; GO:0001654 eye development; GO:0002009 morphogenesis of an epithelium; GO:0002072 optic cup morphogenesis involved in camera-type eye development; GO:0002138 retinoic acid biosynthetic process; GO:0006066 alcohol metabolic process; GO:0006082 organic acid metabolic process; GO:0006629 lipid metabolic process; GO:0006720 isoprenoid metabolic process; GO:00067…	GO:0005622 intracellular; GO:0005623 cell; GO:0005634 nucleus; GO:0005737 cytoplasm; GO:0005829 cytosol; GO:0043226 organelle; GO:0043227 membrane-bounded organelle; GO:0043229 intracellular organelle; GO:0043231 intracellular membrane-bounded organelle;	GO:0000166 nucleotide binding; GO:0001758 retinal dehydrogenase activity; GO:0003824 catalytic activity; GO:0004028 3-chloroallyl aldehyde dehydrogenase activity; GO:0004029 aldehyde dehydrogenase (NAD+) activity; GO:0005488 binding; GO:0005515 protein binding; GO:0016491 oxidoreductase activity; GO:0016620 oxidoreductase activity, acting on the aldehyde or oxo group of donors, NAD or NADP as acc…			C	KOG2450	Aldehyde dehydrogenase
Q8CI11	Guanine nucleotide-binding protein-like 3 OS=Mus musculus OX=10090 GN=Gnl3 PE=1 SV=2	Gnl3	3.1442	0.00077458	Up	60.786	16.9	6	6	0.516072		0.437798		0.472442	0.610198	0.465575		1.15794	1.26133	1.56113	1.90958	1.60794	nucleus	K14538	NUG1; nuclear GTP-binding protein	mmu03008 Ribosome biogenesis in eukaryotes	GO:0006355 regulation of transcription, DNA-templated; GO:0006357 regulation of transcription by RNA polymerase II; GO:0008283 cell population proliferation; GO:0009889 regulation of biosynthetic process; GO:0009891 positive regulation of biosynthetic process; GO:0009893 positive regulation of metabolic process; GO:0009987 cellular process; GO:0010468 regulation of gene expression; GO:0010556 reg…	GO:0005622 intracellular; GO:0005623 cell; GO:0005634 nucleus; GO:0005654 nucleoplasm; GO:0005730 nucleolus; GO:0016604 nuclear body; GO:0031974 membrane-enclosed lumen; GO:0031981 nuclear lumen; GO:0043226 organelle; GO:0043227 membrane-bounded organelle; GO:0043228 non-membrane-bounded organelle; GO:0043229 intracellular organelle; GO:0043231 intracellular membrane-bounded organelle; GO:0043232…	GO:0000166 nucleotide binding; GO:0001882 nucleoside binding; GO:0001883 purine nucleoside binding; GO:0003676 nucleic acid binding; GO:0003723 RNA binding; GO:0003729 mRNA binding; GO:0003824 catalytic activity; GO:0003924 GTPase activity; GO:0005488 binding; GO:0005525 GTP binding; GO:0016462 pyrophosphatase activity; GO:0016787 hydrolase activity; GO:0016817 hydrolase activity, acting on acid …			S	KOG2484	GTPase
Q8R0W0	Epiplakin OS=Mus musculus OX=10090 GN=Eppk1 PE=1 SV=2	Eppk1	3.1206	0.00010128	Up	723.3	17.7	14	11	0.747767	0.513684	0.431506	0.702275	0.342343	0.483255	0.526386	0.44765	1.63263	1.59845	1.76932	1.88453	1.92021	nucleus				GO:0006950 response to stress; GO:0006996 organelle organization; GO:0007010 cytoskeleton organization; GO:0008285 negative regulation of cell population proliferation; GO:0009611 response to wounding; GO:0009987 cellular process; GO:0010632 regulation of epithelial cell migration; GO:0010633 negative regulation of epithelial cell migration; GO:0010837 regulation of keratinocyte proliferation; GO…	GO:0005622 intracellular; GO:0005623 cell; GO:0005634 nucleus; GO:0005856 cytoskeleton; GO:0005882 intermediate filament; GO:0005911 cell-cell junction; GO:0005923 bicellular tight junction; GO:0030054 cell junction; GO:0030055 cell-substrate junction; GO:0030056 hemidesmosome; GO:0031974 membrane-enclosed lumen; GO:0031981 nuclear lumen; GO:0043226 organelle; GO:0043227 membrane-bounded organell…	GO:0005488 binding; GO:0019215 intermediate filament binding; GO:0044877 protein-containing complex binding;			Z	KOG0516	Dystonin, GAS (Growth-arrest-specific protein), and related proteins
Q9D0I8	mRNA turnover protein 4 homolog OS=Mus musculus OX=10090 GN=Mrto4 PE=1 SV=1	Mrto4	3.1196	1.44568e-05	Up	27.545	21.3	4	4	0.503524	0.485689	0.592946		0.54883	0.538826	0.552192	0.551782	1.73247	1.66822	1.30446	1.80577	1.71529	nucleus	K14815			GO:0000027 ribosomal large subunit assembly; GO:0000956 nuclear-transcribed mRNA catabolic process; GO:0006139 nucleobase-containing compound metabolic process; GO:0006364 rRNA processing; GO:0006396 RNA processing; GO:0006401 RNA catabolic process; GO:0006402 mRNA catabolic process; GO:0006725 cellular aromatic compound metabolic process; GO:0006807 nitrogen compound metabolic process; GO:000699…	GO:0005622 intracellular; GO:0005623 cell; GO:0005634 nucleus; GO:0005730 nucleolus; GO:0031974 membrane-enclosed lumen; GO:0031981 nuclear lumen; GO:0043226 organelle; GO:0043227 membrane-bounded organelle; GO:0043228 non-membrane-bounded organelle; GO:0043229 intracellular organelle; GO:0043231 intracellular membrane-bounded organelle; GO:0043232 intracellular non-membrane-bounded organelle; GO…				A	KOG0816	Protein involved in mRNA turnover
Q9EQK5	Major vault protein OS=Mus musculus OX=10090 GN=Mvp PE=1 SV=4	Mvp	3.0809	1.46468e-09	Up	95.923	57.7	34	34	0.533231	0.515865	0.547423	0.638617	0.647886	0.635731	0.652761	0.630663	1.6576	1.68823	1.62986	1.58379	1.63836	cytoplasm	K17266			GO:0001775 cell activation; GO:0001932 regulation of protein phosphorylation; GO:0001933 negative regulation of protein phosphorylation; GO:0002252 immune effector process; GO:0002263 cell activation involved in immune response; GO:0002274 myeloid leukocyte activation; GO:0002275 myeloid cell activation involved in immune response; GO:0002283 neutrophil activation involved in immune response; GO:…	GO:0005576 extracellular region; GO:0005622 intracellular; GO:0005623 cell; GO:0005634 nucleus; GO:0005737 cytoplasm; GO:0005829 cytosol; GO:0005856 cytoskeleton; GO:0012505 endomembrane system; GO:0030141 secretory granule; GO:0031410 cytoplasmic vesicle; GO:0031974 membrane-enclosed lumen; GO:0031982 vesicle; GO:0031983 vesicle lumen; GO:0034774 secretory granule lumen; GO:0043226 organelle; GO…	GO:0005488 binding; GO:0005515 protein binding; GO:0019899 enzyme binding; GO:0019900 kinase binding; GO:0019901 protein kinase binding; GO:0019902 phosphatase binding; GO:0019903 protein phosphatase binding; GO:0042802 identical protein binding;	PF01505; PF11978	Major Vault Protein repeat; Shoulder domain
Q07456	Protein AMBP OS=Mus musculus OX=10090 GN=Ambp PE=1 SV=2	Ambp	3.0656	1.13608e-06	Up	39.029	33	9	9	0.575939	0.464168	0.568551	0.607491	0.649294	0.645569	0.640705	0.629193	1.65785	1.60657	1.76297	1.61814	1.57357	extracellular	K23620			GO:0000003 reproduction; GO:0001932 regulation of protein phosphorylation; GO:0001933 negative regulation of protein phosphorylation; GO:0002682 regulation of immune system process; GO:0002683 negative regulation of immune system process; GO:0006725 cellular aromatic compound metabolic process; GO:0006778 porphyrin-containing compound metabolic process; GO:0006787 porphyrin-containing compound ca…	GO:0005576 extracellular region; GO:0005615 extracellular space; GO:0005622 intracellular; GO:0005623 cell; GO:0005886 plasma membrane; GO:0009986 cell surface; GO:0016020 membrane; GO:0043226 organelle; GO:0043227 membrane-bounded organelle; GO:0043229 intracellular organelle; GO:0043231 intracellular membrane-bounded organelle; GO:0071944 cell periphery;	GO:0004857 enzyme inhibitor activity; GO:0004866 endopeptidase inhibitor activity; GO:0004867 serine-type endopeptidase inhibitor activity; GO:0005246 calcium channel regulator activity; GO:0005488 binding; GO:0005515 protein binding; GO:0008200 ion channel inhibitor activity; GO:0016247 channel regulator activity; GO:0016248 channel inhibitor activity; GO:0019855 calcium channel inhibitor activi…	PF00061; PF00014	Lipocalin / cytosolic fatty-acid binding protein family; Kunitz/Bovine pancreatic trypsin inhibitor domain	O	KOG4295	Serine proteinase inhibitor (KU family)
P20918	Plasminogen OS=Mus musculus OX=10090 GN=Plg PE=1 SV=3	Plg	3.0639	2.77341e-09	Up	90.807	65.8	44	44	0.610678	0.594239	0.629301	0.363201	0.367603	0.361942	0.351194	0.355522	1.88116	1.90853	1.8574	1.79175	1.92748	extracellular	K01315	PLG; plasminogen [EC:3.4.21.7]	mmu05150 Staphylococcus aureus infection; mmu04080 Neuroactive ligand-receptor interaction; mmu04610 Complement and coagulation cascades; mmu05164 Influenza A	GO:0000003 reproduction; GO:0001568 blood vessel development; GO:0001701 in utero embryonic development; GO:0001890 placenta development; GO:0001892 embryonic placenta development; GO:0001944 vasculature development; GO:0002376 immune system process; GO:0002576 platelet degranulation; GO:0003006 developmental process involved in reproduction; GO:0006508 proteolysis; GO:0006807 nitrogen compound m…	GO:0005576 extracellular region; GO:0005615 extracellular space; GO:0005622 intracellular; GO:0005623 cell; GO:0005737 cytoplasm; GO:0005886 plasma membrane; GO:0009897 external side of plasma membrane; GO:0009986 cell surface; GO:0012505 endomembrane system; GO:0016020 membrane; GO:0019897 extrinsic component of plasma membrane; GO:0019898 extrinsic component of membrane; GO:0030141 secretory gr…	GO:0003823 antigen binding; GO:0003824 catalytic activity; GO:0004175 endopeptidase activity; GO:0004252 serine-type endopeptidase activity; GO:0005102 signaling receptor binding; GO:0005488 binding; GO:0005515 protein binding; GO:0008233 peptidase activity; GO:0008236 serine-type peptidase activity; GO:0016787 hydrolase activity; GO:0017171 serine hydrolase activity; GO:0019899 enzyme binding; G…	PF00024; PF00051; PF00089	PAN domain; Kringle domain; Trypsin
P08071	Lactotransferrin OS=Mus musculus OX=10090 GN=Ltf PE=1 SV=4	Ltf	3.0348	4.22679e-06	Up	77.837	36.4	19	19	0.734282	0.623984	0.645999	0.149463	0.143328	0.151172	0.276703	0.137517	1.95164	1.81289	2.23509	2.26175	1.87618	extracellular	K17283			GO:0001501 skeletal system development; GO:0001817 regulation of cytokine production; GO:0001818 negative regulation of cytokine production; GO:0001906 cell killing; GO:0001932 regulation of protein phosphorylation; GO:0001934 positive regulation of protein phosphorylation; GO:0002227 innate immune response in mucosa; GO:0002251 organ or tissue specific immune response; GO:0002376 immune system p…	GO:0005576 extracellular region; GO:0005615 extracellular space; GO:0005622 intracellular; GO:0005623 cell; GO:0005737 cytoplasm; GO:0009986 cell surface; GO:0012505 endomembrane system; GO:0030141 secretory granule; GO:0031410 cytoplasmic vesicle; GO:0031982 vesicle; GO:0032991 protein-containing complex; GO:0042581 specific granule; GO:0043226 organelle; GO:0043227 membrane-bounded organelle; G…	GO:0001530 lipopolysaccharide binding; GO:0003824 catalytic activity; GO:0004857 enzyme inhibitor activity; GO:0004866 endopeptidase inhibitor activity; GO:0004869 cysteine-type endopeptidase inhibitor activity; GO:0005102 signaling receptor binding; GO:0005488 binding; GO:0005506 iron ion binding; GO:0005515 protein binding; GO:0005539 glycosaminoglycan binding; GO:0008047 enzyme activator activ…	PF00405	Transferrin
Q7TNP2	Serine/threonine-protein phosphatase 2A 65 kDa regulatory subunit A beta isoform OS=Mus musculus OX=10090 GN=Ppp2r1b PE=1 SV=2	Ppp2r1b	3.0113	5.76047e-08	Up	65.934	38.1	16	10	0.533073	0.565965	0.501362	0.691765	0.590208	0.702994	0.699617	0.682897	1.60334	1.7044	1.56787	1.54365	1.61286	cytoplasm	K03456	PPP2R1; serine/threonine-protein phosphatase 2A regulatory subunit A	mmu04114 Oocyte meiosis; mmu04728 Dopaminergic synapse; mmu05165 Human papillomavirus infection; mmu03015 mRNA surveillance pathway; mmu05142 Chagas disease; mmu04071 Sphingolipid signaling pathway; mmu04261 Adrenergic signaling in cardiomyocytes; mmu04151 PI3K-Akt signaling pathway; mmu05160 Hepatitis C; mmu04390 Hippo signaling pathway; mmu04152 AMPK signaling pathway; mmu04730 Long-term depres…	GO:0006915 apoptotic process; GO:0008219 cell death; GO:0009653 anatomical structure morphogenesis; GO:0009966 regulation of signal transduction; GO:0009967 positive regulation of signal transduction; GO:0009987 cellular process; GO:0010646 regulation of cell communication; GO:0010647 positive regulation of cell communication; GO:0010941 regulation of cell death; GO:0010942 positive regulation of…	GO:0016020 membrane; GO:0045121 membrane raft; GO:0098589 membrane region; GO:0098805 whole membrane; GO:0098857 membrane microdomain;				T	KOG0211	Protein phosphatase 2A regulatory subunit A and related proteins
Q922M3	BTB/POZ domain-containing adapter for CUL3-mediated RhoA degradation protein 3 OS=Mus musculus OX=10090 GN=Kctd10 PE=1 SV=1	Kctd10	3.0067	0.000256048	Up	35.701	17.8	4	3		0.448301	0.52857	0.706671	0.676298		0.692773	0.604521	1.29845	1.66064	1.19318	1.5536	1.63698	cytoskeleton	K15074			GO:0001525 angiogenesis; GO:0001568 blood vessel development; GO:0001944 vasculature development; GO:0006464 cellular protein modification process; GO:0006508 proteolysis; GO:0006511 ubiquitin-dependent protein catabolic process; GO:0006807 nitrogen compound metabolic process; GO:0007275 multicellular organism development; GO:0007507 heart development; GO:0008152 metabolic process; GO:0008593 reg…	GO:0000151 ubiquitin ligase complex; GO:0005622 intracellular; GO:0005623 cell; GO:0005634 nucleus; GO:0005654 nucleoplasm; GO:0005737 cytoplasm; GO:0005829 cytosol; GO:0005929 cilium; GO:0031461 cullin-RING ubiquitin ligase complex; GO:0031463 Cul3-RING ubiquitin ligase complex; GO:0031974 membrane-enclosed lumen; GO:0031981 nuclear lumen; GO:0032991 protein-containing complex; GO:0035869 ciliar…	GO:0005102 signaling receptor binding; GO:0005112 Notch binding; GO:0005488 binding; GO:0005515 protein binding;	PF02214	K+ channel tetramerisation domain	P	KOG2716	Polymerase delta-interacting protein PDIP1 and related proteins, contain BTB/POZ domain
Q60847	Collagen alpha-1(XII) chain OS=Mus musculus OX=10090 GN=Col12a1 PE=2 SV=3	Col12a1	3.005	0.000273414	Up	340.21	26.9	55	55	0.278409	0.142967	0.194399	2.31689	1.64939	1.81672	1.75577	1.7614	0.609659	0.589622	0.551759	0.691749	0.641264	extracellular	K08132	COL12A; collagen type XII alpha	mmu04974 Protein digestion and absorption	GO:0001501 skeletal system development; GO:0001704 formation of primary germ layer; GO:0001706 endoderm formation; GO:0007275 multicellular organism development; GO:0007369 gastrulation; GO:0007492 endoderm development; GO:0009653 anatomical structure morphogenesis; GO:0009790 embryo development; GO:0009888 tissue development; GO:0009987 cellular process; GO:0016043 cellular component organizatio…	GO:0005576 extracellular region; GO:0005581 collagen trimer; GO:0005593 FACIT collagen trimer; GO:0005595 collagen type XII trimer; GO:0005622 intracellular; GO:0005623 cell; GO:0005737 cytoplasm; GO:0005783 endoplasmic reticulum; GO:0005788 endoplasmic reticulum lumen; GO:0012505 endomembrane system; GO:0030934 anchoring collagen complex; GO:0031012 extracellular matrix; GO:0031974 membrane-encl…		PF00041; PF00092	Fibronectin type III domain; von Willebrand factor type A domain	W	KOG3544	Collagens (type IV and type XIII), and related proteins
Q8C4J7	Transducin beta-like protein 3 OS=Mus musculus OX=10090 GN=Tbl3 PE=2 SV=1	Tbl3	3.0023	0.00050335	Up	88.265	13.2	7	7	0.581247	0.456426		0.735992	0.664545	0.774995	0.51576	0.482501	1.30811	1.58626	1.33322	1.94989	1.61106	cytoplasm	K14555	UTP13; U3 small nucleolar RNA-associated protein 13	mmu03008 Ribosome biogenesis in eukaryotes	GO:0000462 maturation of SSU-rRNA from tricistronic rRNA transcript (SSU-rRNA, 5.8S rRNA, LSU-rRNA); GO:0006139 nucleobase-containing compound metabolic process; GO:0006364 rRNA processing; GO:0006396 RNA processing; GO:0006725 cellular aromatic compound metabolic process; GO:0006807 nitrogen compound metabolic process; GO:0008152 metabolic process; GO:0009987 cellular process; GO:0010467 gene ex…	GO:0005622 intracellular; GO:0005623 cell; GO:0005634 nucleus; GO:0005654 nucleoplasm; GO:0005730 nucleolus; GO:0030684 preribosome; GO:0030686 90S preribosome; GO:0031974 membrane-enclosed lumen; GO:0031981 nuclear lumen; GO:0032040 small-subunit processome; GO:0032991 protein-containing complex; GO:0034388 Pwp2p-containing subcomplex of 90S preribosome; GO:0043226 organelle; GO:0043227 membrane…	GO:0003676 nucleic acid binding; GO:0003723 RNA binding; GO:0005488 binding; GO:0030515 snoRNA binding; GO:0097159 organic cyclic compound binding; GO:1901363 heterocyclic compound binding;	PF08625	Utp13 specific WD40 associated domain	A	KOG0319	WD40-repeat-containing subunit of the 18S rRNA processing complex
P16294	Coagulation factor IX OS=Mus musculus OX=10090 GN=F9 PE=2 SV=3	F9	2.9924	6.92949e-05	Up	52.977	25.1	9	9	0.671137	0.506108	0.665039	0.378538	0.376688	0.444023	0.39571	0.374619	2.10393	1.77953	1.9605	1.41847	1.92571	extracellular	K01321	F9; coagulation factor IX (Christmas factor) [EC:3.4.21.22]	mmu04610 Complement and coagulation cascades	GO:0006508 proteolysis; GO:0006807 nitrogen compound metabolic process; GO:0006810 transport; GO:0006888 endoplasmic reticulum to Golgi vesicle-mediated transport; GO:0006950 response to stress; GO:0007596 blood coagulation; GO:0007597 blood coagulation, intrinsic pathway; GO:0007599 hemostasis; GO:0008152 metabolic process; GO:0009611 response to wounding; GO:0010467 gene expression; GO:0016192 …	GO:0005576 extracellular region; GO:0005615 extracellular space; GO:0005622 intracellular; GO:0005623 cell; GO:0005737 cytoplasm; GO:0005783 endoplasmic reticulum; GO:0005788 endoplasmic reticulum lumen; GO:0005794 Golgi apparatus; GO:0005796 Golgi lumen; GO:0005886 plasma membrane; GO:0012505 endomembrane system; GO:0016020 membrane; GO:0031974 membrane-enclosed lumen; GO:0043226 organelle; GO:0…	GO:0000287 magnesium ion binding; GO:0003824 catalytic activity; GO:0004175 endopeptidase activity; GO:0004252 serine-type endopeptidase activity; GO:0005488 binding; GO:0005509 calcium ion binding; GO:0008233 peptidase activity; GO:0008236 serine-type peptidase activity; GO:0016787 hydrolase activity; GO:0017171 serine hydrolase activity; GO:0043167 ion binding; GO:0043169 cation binding; GO:004…	PF00594; PF00008; PF00089	Vitamin K-dependent carboxylation/gamma-carboxyglutamic (GLA) domain; EGF-like domain; Trypsin
Q3ULW8	Protein mono-ADP-ribosyltransferase PARP3 OS=Mus musculus OX=10090 GN=Parp3 PE=2 SV=1	Parp3	2.991	4.79102e-06	Up	59.948	36.2	12	12	0.395192	0.514861	0.499819	0.914988	0.948836	0.982005	0.832605	0.883416	1.25846	1.46454	1.41874	1.46149	1.42504	nucleus	K10798	PARP2_3_4; poly [ADP-ribose] polymerase 2/3/4 [EC:2.4.2.30]	mmu04210 Apoptosis; mmu03410 Base excision repair	GO:0000723 telomere maintenance; GO:0006139 nucleobase-containing compound metabolic process; GO:0006259 DNA metabolic process; GO:0006260 DNA replication; GO:0006261 DNA-dependent DNA replication; GO:0006266 DNA ligation; GO:0006271 DNA strand elongation involved in DNA replication; GO:0006273 lagging strand elongation; GO:0006281 DNA repair; GO:0006302 double-strand break repair; GO:0006464 cel…	GO:0005622 intracellular; GO:0005623 cell; GO:0005634 nucleus; GO:0005694 chromosome; GO:0005737 cytoplasm; GO:0005814 centriole; GO:0005815 microtubule organizing center; GO:0005856 cytoskeleton; GO:0015630 microtubule cytoskeleton; GO:0035861 site of double-strand break; GO:0043226 organelle; GO:0043227 membrane-bounded organelle; GO:0043228 non-membrane-bounded organelle; GO:0043229 intracellu…	GO:0003824 catalytic activity; GO:0003909 DNA ligase activity; GO:0003910 DNA ligase (ATP) activity; GO:0003950 NAD+ ADP-ribosyltransferase activity; GO:0016740 transferase activity; GO:0016757 transferase activity, transferring glycosyl groups; GO:0016763 transferase activity, transferring pentosyl groups; GO:0016874 ligase activity; GO:0016886 ligase activity, forming phosphoric ester bonds; GO…	PF05406; PF02877	WGR domain; Poly(ADP-ribose) polymerase, regulatory domain	KLO	KOG1037	NAD+ ADP-ribosyltransferase Parp, required for poly-ADP ribosylation of nuclear proteins
P10810	Monocyte differentiation antigen CD14 OS=Mus musculus OX=10090 GN=Cd14 PE=1 SV=1	Cd14	2.9313	0.00106724	Up	39.203	29	7	7		0.614123	0.334756	0.796239	0.725233	0.953703	0.803235	0.819084	1.35351	1.29492	1.47681	1.44872	1.37966	extracellular	K04391	CD14; monocyte differentiation antigen CD14	mmu05221 Acute myeloid leukemia; mmu04010 MAPK signaling pathway; mmu04064 NF-kappa B signaling pathway; mmu05134 Legionellosis; mmu05146 Amoebiasis; mmu05132 Salmonella infection; mmu05152 Tuberculosis; mmu05202 Transcriptional misregulation in cancer; mmu04640 Hematopoietic cell lineage; mmu04620 Toll-like receptor signaling pathway; mmu05133 Pertussis; mmu04145 Phagosome	GO:0001775 cell activation; GO:0001817 regulation of cytokine production; GO:0001819 positive regulation of cytokine production; GO:0002218 activation of innate immune response; GO:0002221 pattern recognition receptor signaling pathway; GO:0002224 toll-like receptor signaling pathway; GO:0002237 response to molecule of bacterial origin; GO:0002252 immune effector process; GO:0002253 activation of…	GO:0005576 extracellular region; GO:0005615 extracellular space; GO:0005622 intracellular; GO:0005623 cell; GO:0005737 cytoplasm; GO:0005768 endosome; GO:0005794 Golgi apparatus; GO:0005886 plasma membrane; GO:0009897 external side of plasma membrane; GO:0009986 cell surface; GO:0010008 endosome membrane; GO:0012505 endomembrane system; GO:0012506 vesicle membrane; GO:0016020 membrane; GO:0016021…	GO:0001530 lipopolysaccharide binding; GO:0001847 opsonin receptor activity; GO:0004888 transmembrane signaling receptor activity; GO:0005488 binding; GO:0008289 lipid binding; GO:0016019 peptidoglycan immune receptor activity; GO:0033218 amide binding; GO:0038023 signaling receptor activity; GO:0038187 pattern recognition receptor activity; GO:0042277 peptide binding; GO:0060089 molecular transd…
P05366	Serum amyloid A-1 protein OS=Mus musculus OX=10090 GN=Saa1 PE=1 SV=2	Saa1	2.9002	3.4073e-09	Up	13.77	37.7	5	4	0.721715	0.69664	0.731949	0.087707	0.090658	0.107754	0.080897	0.088739	2.13943	2.11465	2.06365	1.98339	2.09282	extracellular	K17310			GO:0000187 activation of MAPK activity; GO:0001775 cell activation; GO:0001817 regulation of cytokine production; GO:0001819 positive regulation of cytokine production; GO:0001932 regulation of protein phosphorylation; GO:0001934 positive regulation of protein phosphorylation; GO:0002376 immune system process; GO:0002526 acute inflammatory response; GO:0002791 regulation of peptide secretion; GO:…	GO:0005576 extracellular region; GO:0005615 extracellular space; GO:0005622 intracellular; GO:0005623 cell; GO:0005737 cytoplasm; GO:0005856 cytoskeleton; GO:0005874 microtubule; GO:0005881 cytoplasmic microtubule; GO:0015630 microtubule cytoskeleton; GO:0030139 endocytic vesicle; GO:0031410 cytoplasmic vesicle; GO:0031974 membrane-enclosed lumen; GO:0031982 vesicle; GO:0031983 vesicle lumen; GO:…	GO:0001664 G protein-coupled receptor binding; GO:0005102 signaling receptor binding; GO:0005488 binding; GO:0005515 protein binding; GO:0030545 receptor regulator activity; GO:0042056 chemoattractant activity; GO:0048018 receptor ligand activity; GO:0098772 molecular function regulator;
Q64337	Sequestosome-1 OS=Mus musculus OX=10090 GN=Sqstm1 PE=1 SV=1	Sqstm1	2.8973	6.85771e-08	Up	48.162	53.2	11	11	0.531161	0.504357	0.492007	0.872853	0.782925	0.776661	0.883128	0.780761	1.40514	1.45948	1.40899	1.56549	1.53704	nucleus	K14381	SQSTM1; sequestosome 1	mmu04137 Mitophagy - animal; mmu04380 Osteoclast differentiation; mmu04217 Necroptosis; mmu04140 Autophagy - animal; mmu05418 Fluid shear stress and atherosclerosis; mmu04218 Cellular senescence; mmu05022 Pathways of neurodegeneration - multiple diseases; mmu05014 Amyotrophic lateral sclerosis	GO:0000122 negative regulation of transcription by RNA polymerase II; GO:0000422 autophagy of mitochondrion; GO:0000423 mitophagy; GO:0001932 regulation of protein phosphorylation; GO:0001934 positive regulation of protein phosphorylation; GO:0002931 response to ischemia; GO:0006355 regulation of transcription, DNA-templated; GO:0006357 regulation of transcription by RNA polymerase II; GO:0006464…	GO:0000323 lytic vacuole; GO:0000407 phagophore assembly site; GO:0000932 P-body; GO:0005622 intracellular; GO:0005623 cell; GO:0005634 nucleus; GO:0005654 nucleoplasm; GO:0005737 cytoplasm; GO:0005764 lysosome; GO:0005767 secondary lysosome; GO:0005773 vacuole; GO:0005776 autophagosome; GO:0005829 cytosol; GO:0005929 cilium; GO:0016234 inclusion body; GO:0016235 aggresome; GO:0016604 nuclear bod…	GO:0003712 transcription coregulator activity; GO:0003824 catalytic activity; GO:0004672 protein kinase activity; GO:0004674 protein serine/threonine kinase activity; GO:0005080 protein kinase C binding; GO:0005102 signaling receptor binding; GO:0005488 binding; GO:0005515 protein binding; GO:0016301 kinase activity; GO:0016740 transferase activity; GO:0016772 transferase activity, transferring p…	PF00564; PF00569	PB1 domain; Zinc finger, ZZ type	S	KOG4582	Uncharacterized conserved protein, contains ZZ-type Zn-finger
P07742	Ribonucleoside-diphosphate reductase large subunit OS=Mus musculus OX=10090 GN=Rrm1 PE=1 SV=2	Rrm1	2.863	2.15923e-06	Up	90.209	17.9	9	9	0.590337	0.550463	0.545336	0.593622	0.759786	0.561614	0.58272	0.770539	1.6497	1.47482	1.46138	1.84533	1.61435	cytoplasm	K10807	RRM1; ribonucleoside-diphosphate reductase subunit M1 [EC:1.17.4.1]	mmu00240 Pyrimidine metabolism; mmu00480 Glutathione metabolism; mmu01100 Metabolic pathways; mmu00983 Drug metabolism - other enzymes; mmu00230 Purine metabolism	GO:0006139 nucleobase-containing compound metabolic process; GO:0006725 cellular aromatic compound metabolic process; GO:0006753 nucleoside phosphate metabolic process; GO:0006793 phosphorus metabolic process; GO:0006796 phosphate-containing compound metabolic process; GO:0006807 nitrogen compound metabolic process; GO:0008152 metabolic process; GO:0009058 biosynthetic process; GO:0009117 nucleot…	GO:0005622 intracellular; GO:0005623 cell; GO:0005634 nucleus; GO:0005635 nuclear envelope; GO:0005737 cytoplasm; GO:0005829 cytosol; GO:0005971 ribonucleoside-diphosphate reductase complex; GO:0012505 endomembrane system; GO:0031967 organelle envelope; GO:0031975 envelope; GO:0032991 protein-containing complex; GO:0036477 somatodendritic compartment; GO:0042995 cell projection; GO:0043025 neuron…	GO:0000166 nucleotide binding; GO:0003824 catalytic activity; GO:0004748 ribonucleoside-diphosphate reductase activity, thioredoxin disulfide as acceptor; GO:0005488 binding; GO:0005515 protein binding; GO:0016491 oxidoreductase activity; GO:0016725 oxidoreductase activity, acting on CH or CH2 groups; GO:0016728 oxidoreductase activity, acting on CH or CH2 groups, disulfide as acceptor; GO:001707…	PF03477; PF00317	ATP cone domain; Ribonucleotide reductase, all-alpha domain	F	KOG1112	Ribonucleotide reductase, alpha subunit
P35441	Thrombospondin-1 OS=Mus musculus OX=10090 GN=Thbs1 PE=1 SV=1	Thbs1	2.8574	5.00875e-07	Up	129.65	28	25	25	0.547899	0.631661	0.622677	0.49989	0.561853	0.467823	0.533242	0.552215	1.63777	1.80192	1.59437	1.77198	1.7767	extracellular	K16857	THBS1; thrombospondin 1	mmu04015 Rap1 signaling pathway; mmu05206 MicroRNAs in cancer; mmu05165 Human papillomavirus infection; mmu05144 Malaria; mmu04510 Focal adhesion; mmu05219 Bladder cancer; mmu04151 PI3K-Akt signaling pathway; mmu05205 Proteoglycans in cancer; mmu04512 ECM-receptor interaction; mmu04115 p53 signaling pathway; mmu04145 Phagosome; mmu04350 TGF-beta signaling pathway	GO:0000187 activation of MAPK activity; GO:0000302 response to reactive oxygen species; GO:0001501 skeletal system development; GO:0001525 angiogenesis; GO:0001568 blood vessel development; GO:0001666 response to hypoxia; GO:0001817 regulation of cytokine production; GO:0001818 negative regulation of cytokine production; GO:0001819 positive regulation of cytokine production; GO:0001932 regulation…	GO:0005576 extracellular region; GO:0005577 fibrinogen complex; GO:0005615 extracellular space; GO:0005622 intracellular; GO:0005623 cell; GO:0005737 cytoplasm; GO:0005783 endoplasmic reticulum; GO:0005788 endoplasmic reticulum lumen; GO:0005886 plasma membrane; GO:0009897 external side of plasma membrane; GO:0009986 cell surface; GO:0012505 endomembrane system; GO:0016020 membrane; GO:0016528 sa…	GO:0001786 phosphatidylserine binding; GO:0001968 fibronectin binding; GO:0005102 signaling receptor binding; GO:0005178 integrin binding; GO:0005488 binding; GO:0005509 calcium ion binding; GO:0005515 protein binding; GO:0005518 collagen binding; GO:0005539 glycosaminoglycan binding; GO:0005543 phospholipid binding; GO:0008201 heparin binding; GO:0008289 lipid binding; GO:0017134 fibroblast grow…	PF00090	Thrombospondin type 1 domain
E9Q557	Desmoplakin OS=Mus musculus OX=10090 GN=Dsp PE=1 SV=1	Dsp	2.8538	4.21508e-06	Up	332.91	5.9	11	11		0.431337	0.430143	0.938405	0.851763	0.965591	1.20406	1.03255	1.32108	1.18421	1.14668	1.31234	1.18184	nucleus	K10381	DSP; desmoplakin	mmu05412 Arrhythmogenic right ventricular cardiomyopathy	GO:0001775 cell activation; GO:0002027 regulation of heart rate; GO:0002252 immune effector process; GO:0002263 cell activation involved in immune response; GO:0002274 myeloid leukocyte activation; GO:0002275 myeloid cell activation involved in immune response; GO:0002283 neutrophil activation involved in immune response; GO:0002366 leukocyte activation involved in immune response; GO:0002376 imm…	GO:0001533 cornified envelope; GO:0005622 intracellular; GO:0005623 cell; GO:0005737 cytoplasm; GO:0005886 plasma membrane; GO:0005911 cell-cell junction; GO:0005912 adherens junction; GO:0005916 fascia adherens; GO:0012505 endomembrane system; GO:0012506 vesicle membrane; GO:0014704 intercalated disc; GO:0016020 membrane; GO:0016323 basolateral plasma membrane; GO:0030054 cell junction; GO:00300…	GO:0005080 protein kinase C binding; GO:0005198 structural molecule activity; GO:0005200 structural constituent of cytoskeleton; GO:0005488 binding; GO:0005515 protein binding; GO:0019899 enzyme binding; GO:0019900 kinase binding; GO:0019901 protein kinase binding; GO:0030674 protein-macromolecule adaptor activity; GO:0060090 molecular adaptor activity; GO:0086080 protein binding involved in hete…			Z	KOG0516	Dystonin, GAS (Growth-arrest-specific protein), and related proteins
Q922S4	cGMP-dependent 3',5'-cyclic phosphodiesterase OS=Mus musculus OX=10090 GN=Pde2a PE=1 SV=4	Pde2a	2.8437	1.07141e-05	Up	105.62	18.5	10	10	0.572129	0.553832	0.434421	0.769728	0.94677	0.779506	0.770506	0.777617	1.47438	1.50019	1.30437	1.5026	1.61394	mitochondria	K18283	PDE2A; cGMP-dependent 3',5'-cyclic phosphodiesterase [EC:3.1.4.17]	mmu05032 Morphine addiction; mmu01100 Metabolic pathways; mmu04740 Olfactory transduction; mmu04022 cGMP-PKG signaling pathway; mmu04925 Aldosterone synthesis and secretion; mmu00230 Purine metabolism	GO:0000122 negative regulation of transcription by RNA polymerase II; GO:0001101 response to acid chemical; GO:0001568 blood vessel development; GO:0001885 endothelial cell development; GO:0001944 vasculature development; GO:0002064 epithelial cell development; GO:0002082 regulation of oxidative phosphorylation; GO:0002237 response to molecule of bacterial origin; GO:0002376 immune system process…	GO:0005622 intracellular; GO:0005623 cell; GO:0005634 nucleus; GO:0005737 cytoplasm; GO:0005739 mitochondrion; GO:0005740 mitochondrial envelope; GO:0005741 mitochondrial outer membrane; GO:0005743 mitochondrial inner membrane; GO:0005759 mitochondrial matrix; GO:0005783 endoplasmic reticulum; GO:0005794 Golgi apparatus; GO:0005829 cytosol; GO:0005886 plasma membrane; GO:0012505 endomembrane syst…	GO:0000166 nucleotide binding; GO:0003824 catalytic activity; GO:0004112 cyclic-nucleotide phosphodiesterase activity; GO:0004114 3',5'-cyclic-nucleotide phosphodiesterase activity; GO:0004115 3',5'-cyclic-AMP phosphodiesterase activity; GO:0004118 cGMP-stimulated cyclic-nucleotide phosphodiesterase activity; GO:0005215 transporter activity; GO:0005216 ion channel activity; GO:0005261 cation chan…	PF13185; PF01590; PF00233	GAF domain; GAF domain; 3'5'-cyclic nucleotide phosphodiesterase	T	KOG3689	Cyclic nucleotide phosphodiesterase
Q9R0E2	Procollagen-lysine,2-oxoglutarate 5-dioxygenase 1 OS=Mus musculus OX=10090 GN=Plod1 PE=1 SV=1	Plod1	2.8343	3.35471e-07	Up	83.594	28.2	14	14	0.578355	0.51253	0.500291	0.793895	0.882307	0.78027	0.802731	0.633248	1.45602	1.42911	1.61608	1.49353	1.52163	extracellular	K00473	PLOD1; procollagen-lysine,2-oxoglutarate 5-dioxygenase 1 [EC:1.14.11.4]	mmu00310 Lysine degradation; mmu01100 Metabolic pathways	GO:0001666 response to hypoxia; GO:0006082 organic acid metabolic process; GO:0006464 cellular protein modification process; GO:0006520 cellular amino acid metabolic process; GO:0006575 cellular modified amino acid metabolic process; GO:0006807 nitrogen compound metabolic process; GO:0006950 response to stress; GO:0008152 metabolic process; GO:0008544 epidermis development; GO:0008652 cellular am…	GO:0005622 intracellular; GO:0005623 cell; GO:0005737 cytoplasm; GO:0005783 endoplasmic reticulum; GO:0005789 endoplasmic reticulum membrane; GO:0005791 rough endoplasmic reticulum; GO:0012505 endomembrane system; GO:0016020 membrane; GO:0030867 rough endoplasmic reticulum membrane; GO:0031090 organelle membrane; GO:0031984 organelle subcompartment; GO:0032991 protein-containing complex; GO:00421…	GO:0003824 catalytic activity; GO:0005488 binding; GO:0005506 iron ion binding; GO:0005515 protein binding; GO:0008198 ferrous iron binding; GO:0008475 procollagen-lysine 5-dioxygenase activity; GO:0016491 oxidoreductase activity; GO:0016705 oxidoreductase activity, acting on paired donors, with incorporation or reduction of molecular oxygen; GO:0016706 2-oxoglutarate-dependent dioxygenase activi…	PF13640	2OG-Fe(II) oxygenase superfamily	O	KOG1971	Lysyl hydroxylase
Q9Z0M6	Adhesion G protein-coupled receptor E5 OS=Mus musculus OX=10090 GN=Adgre5 PE=1 SV=2	Adgre5	2.8193	2.61218e-05	Up	90.412	8.9	5	5		0.51401	0.532851	0.759956	0.755105	0.697044	0.694821	0.667731	1.58881	1.25359	1.48203	1.5413	1.51276	plasma membrane	K08446			GO:0001775 cell activation; GO:0002252 immune effector process; GO:0002263 cell activation involved in immune response; GO:0002274 myeloid leukocyte activation; GO:0002275 myeloid cell activation involved in immune response; GO:0002283 neutrophil activation involved in immune response; GO:0002366 leukocyte activation involved in immune response; GO:0002376 immune system process; GO:0002443 leukoc…	GO:0005576 extracellular region; GO:0005615 extracellular space; GO:0005622 intracellular; GO:0005623 cell; GO:0005737 cytoplasm; GO:0005886 plasma membrane; GO:0005887 integral component of plasma membrane; GO:0012505 endomembrane system; GO:0012506 vesicle membrane; GO:0016020 membrane; GO:0016021 integral component of membrane; GO:0030141 secretory granule; GO:0030659 cytoplasmic vesicle membr…	GO:0004888 transmembrane signaling receptor activity; GO:0004930 G protein-coupled receptor activity; GO:0038023 signaling receptor activity; GO:0060089 molecular transducer activity;	PF07645	Calcium-binding EGF domain	T	KOG4193	G protein-coupled receptors
Q64674	Spermidine synthase OS=Mus musculus OX=10090 GN=Srm PE=1 SV=1	Srm	2.8179	4.88835e-10	Up	33.995	35.1	7	7	0.54524	0.542691	0.560872	0.733994	0.699439	0.720038	0.72383	0.730171	1.57876	1.51226	1.58247	1.52207	1.54817	cytoplasm	K00797	speE; spermidine synthase [EC:2.5.1.16]	mmu00480 Glutathione metabolism; mmu00270 Cysteine and methionine metabolism; mmu00330 Arginine and proline metabolism; mmu01100 Metabolic pathways	GO:0006576 cellular biogenic amine metabolic process; GO:0006595 polyamine metabolic process; GO:0006596 polyamine biosynthetic process; GO:0006807 nitrogen compound metabolic process; GO:0008152 metabolic process; GO:0008216 spermidine metabolic process; GO:0008295 spermidine biosynthetic process; GO:0009058 biosynthetic process; GO:0009308 amine metabolic process; GO:0009309 amine biosynthetic …	GO:0005622 intracellular; GO:0005623 cell; GO:0005737 cytoplasm; GO:0005829 cytosol;	GO:0003824 catalytic activity; GO:0004766 spermidine synthase activity; GO:0005488 binding; GO:0005515 protein binding; GO:0016740 transferase activity; GO:0016765 transferase activity, transferring alkyl or aryl (other than methyl) groups; GO:0042802 identical protein binding; GO:0042803 protein homodimerization activity; GO:0046983 protein dimerization activity;	PF01564	Spermine/spermidine synthase	E	KOG1562	Spermidine synthase
Q71FD7	Filamin-binding LIM protein 1 OS=Mus musculus OX=10090 GN=Fblim1 PE=1 SV=2	Fblim1	2.8055	2.6084e-07	Up	41.026	46.1	12	12	0.520142	0.504062	0.466328	0.913408	0.920757	0.911509	0.88697	0.907365	1.26518	1.4039	1.41624	1.41624	1.4679	nucleus	K24416			GO:0007155 cell adhesion; GO:0009987 cellular process; GO:0016043 cellular component organization; GO:0022607 cellular component assembly; GO:0022610 biological adhesion; GO:0033623 regulation of integrin activation; GO:0034329 cell junction assembly; GO:0034330 cell junction organization; GO:0043254 regulation of protein-containing complex assembly; GO:0044085 cellular component biogenesis; GO:0…	GO:0001650 fibrillar center; GO:0001725 stress fiber; GO:0005622 intracellular; GO:0005623 cell; GO:0005634 nucleus; GO:0005730 nucleolus; GO:0005737 cytoplasm; GO:0005829 cytosol; GO:0005856 cytoskeleton; GO:0005912 adherens junction; GO:0005925 focal adhesion; GO:0005938 cell cortex; GO:0015629 actin cytoskeleton; GO:0030054 cell junction; GO:0030055 cell-substrate junction; GO:0031974 membrane…	GO:0005488 binding; GO:0005515 protein binding; GO:0008092 cytoskeletal protein binding; GO:0031005 filamin binding;	PF00412	LIM domain	T	KOG1704	FOG: LIM domain
B2RQC6	CAD protein OS=Mus musculus OX=10090 GN=Cad PE=1 SV=1	Cad	2.7923	6.19312e-10	Up	243.24	23.5	34	34	0.545259	0.539453	0.559794	0.785773	0.739686	0.742195	0.714342	0.720221	1.58066	1.52573	1.53449	1.49158	1.52083	cytoplasm	K11540	CAD; carbamoyl-phosphate synthase / aspartate carbamoyltransferase / dihydroorotase [EC:6.3.5.5 2.1.3.2 3.5.2.3]	mmu00240 Pyrimidine metabolism; mmu00250 Alanine, aspartate and glutamate metabolism; mmu01100 Metabolic pathways; mmu01240 Biosynthesis of cofactors	GO:0000050 urea cycle; GO:0000052 citrulline metabolic process; GO:0006082 organic acid metabolic process; GO:0006139 nucleobase-containing compound metabolic process; GO:0006206 pyrimidine nucleobase metabolic process; GO:0006207 'de novo' pyrimidine nucleobase biosynthetic process; GO:0006213 pyrimidine nucleoside metabolic process; GO:0006220 pyrimidine nucleotide metabolic process; GO:0006221…	GO:0005622 intracellular; GO:0005623 cell; GO:0005634 nucleus; GO:0005654 nucleoplasm; GO:0005737 cytoplasm; GO:0005739 mitochondrion; GO:0005829 cytosol; GO:0016363 nuclear matrix; GO:0030424 axon; GO:0031974 membrane-enclosed lumen; GO:0031981 nuclear lumen; GO:0032991 protein-containing complex; GO:0034399 nuclear periphery; GO:0036477 somatodendritic compartment; GO:0042995 cell projection; G…	GO:0000166 nucleotide binding; GO:0001882 nucleoside binding; GO:0001884 pyrimidine nucleoside binding; GO:0002134 UTP binding; GO:0003824 catalytic activity; GO:0004070 aspartate carbamoyltransferase activity; GO:0004087 carbamoyl-phosphate synthase (ammonia) activity; GO:0004088 carbamoyl-phosphate synthase (glutamine-hydrolyzing) activity; GO:0004151 dihydroorotase activity; GO:0004672 protein…	PF00988; PF00117; PF02786; PF02787; PF02142; PF01979; PF02729; PF00185	Carbamoyl-phosphate synthase small chain, CPSase domain; Glutamine amidotransferase class-I; Carbamoyl-phosphate synthase L chain, ATP binding domain; Carbamoyl-phosphate synthetase large chain, oligomerisation domain; MGS-like domain; Amidohydrolase family; Aspartate/ornithine carbamoyltransferase, carbamoyl-P binding domain; Aspartate/ornithine carbamoyltransferase, Asp/Orn binding domain	F	KOG0370	Multifunctional pyrimidine synthesis protein CAD (includes carbamoyl-phophate synthetase, aspartate transcarbamylase, and glutamine amidotransferase)
P08032	Spectrin alpha chain, erythrocytic 1 OS=Mus musculus OX=10090 GN=Spta1 PE=1 SV=3	Spta1	2.7898	0.00175499	Up	279.86	31.8	53	52	0.581572	0.558575	0.600363				0.082135	0.084561	1.93935	1.10901	1.98408	1.11466	1.94569	cytoplasm,nucleus	K06114	SPTA; spectrin alpha	mmu04210 Apoptosis	GO:0000165 MAPK cascade; GO:0000902 cell morphogenesis; GO:0000904 cell morphogenesis involved in differentiation; GO:0001776 leukocyte homeostasis; GO:0002260 lymphocyte homeostasis; GO:0002376 immune system process; GO:0002520 immune system development; GO:0002682 regulation of immune system process; GO:0002684 positive regulation of immune system process; GO:0002694 regulation of leukocyte act…	GO:0005622 intracellular; GO:0005623 cell; GO:0005737 cytoplasm; GO:0005829 cytosol; GO:0005856 cytoskeleton; GO:0005886 plasma membrane; GO:0005938 cell cortex; GO:0008091 spectrin; GO:0009898 cytoplasmic side of plasma membrane; GO:0014731 spectrin-associated cytoskeleton; GO:0015629 actin cytoskeleton; GO:0016020 membrane; GO:0030424 axon; GO:0030863 cortical cytoskeleton; GO:0030864 cortical …	GO:0003779 actin binding; GO:0005085 guanyl-nucleotide exchange factor activity; GO:0005088 Ras guanyl-nucleotide exchange factor activity; GO:0005198 structural molecule activity; GO:0005200 structural constituent of cytoskeleton; GO:0005488 binding; GO:0005515 protein binding; GO:0008092 cytoskeletal protein binding; GO:0017016 Ras GTPase binding; GO:0019899 enzyme binding; GO:0031267 small GTP…	PF00435; PF00018; PF08726	Spectrin repeat; SH3 domain; Ca2+ insensitive EF hand	Z	KOG0040	Ca2+-binding actin-bundling protein (spectrin), alpha chain (EF-Hand protein superfamily)
Q9D2V8	Major facilitator superfamily domain-containing protein 10 OS=Mus musculus OX=10090 GN=Mfsd10 PE=1 SV=1	Mfsd10	2.7809	2.62886e-05	Up	49.369	8.1	2	2	0.525295	0.385095	0.48581	1.01733	1.04296	0.953285	1.11904		1.19272	1.36961	1.45854	1.15024	1.30008	plasma membrane				GO:0006810 transport; GO:0006811 ion transport; GO:0006820 anion transport; GO:0006855 drug transmembrane transport; GO:0015711 organic anion transport; GO:0015850 organic hydroxy compound transport; GO:0015893 drug transport; GO:0015904 tetracycline transmembrane transport; GO:0034220 ion transmembrane transport; GO:0042221 response to chemical; GO:0042493 response to drug; GO:0043252 sodium-ind…	GO:0005622 intracellular; GO:0005623 cell; GO:0005737 cytoplasm; GO:0005886 plasma membrane; GO:0005903 brush border; GO:0012506 vesicle membrane; GO:0016020 membrane; GO:0016021 integral component of membrane; GO:0030659 cytoplasmic vesicle membrane; GO:0031090 organelle membrane; GO:0031224 intrinsic component of membrane; GO:0031253 cell projection membrane; GO:0031410 cytoplasmic vesicle; GO:…	GO:0005215 transporter activity; GO:0008493 tetracycline transmembrane transporter activity; GO:0008509 anion transmembrane transporter activity; GO:0008514 organic anion transmembrane transporter activity; GO:0015075 ion transmembrane transporter activity; GO:0015318 inorganic molecular entity transmembrane transporter activity; GO:0015665 alcohol transmembrane transporter activity; GO:0022857 t…			S	KOG2615	Permease of the major facilitator superfamily
Q9JJG0	Transforming acidic coiled-coil-containing protein 2 OS=Mus musculus OX=10090 GN=Tacc2 PE=1 SV=2	Tacc2	2.7794	3.75872e-06	Up	124.13	10.5	9	8	0.508338	0.595643	0.650269	0.758498	0.621679	0.656722	0.502908	0.579719	1.5549	1.50439	1.7501	1.62551	1.69132	nucleus	K14282			GO:0000226 microtubule cytoskeleton organization; GO:0006810 transport; GO:0006996 organelle organization; GO:0007010 cytoskeleton organization; GO:0007017 microtubule-based process; GO:0007049 cell cycle; GO:0007051 spindle organization; GO:0007097 nuclear migration; GO:0007275 multicellular organism development; GO:0007399 nervous system development; GO:0007417 central nervous system developmen…	GO:0005622 intracellular; GO:0005623 cell; GO:0005634 nucleus; GO:0005654 nucleoplasm; GO:0005737 cytoplasm; GO:0005829 cytosol; GO:0005856 cytoskeleton; GO:0005886 plasma membrane; GO:0015630 microtubule cytoskeleton; GO:0016020 membrane; GO:0031974 membrane-enclosed lumen; GO:0031981 nuclear lumen; GO:0043226 organelle; GO:0043227 membrane-bounded organelle; GO:0043228 non-membrane-bounded orga…	GO:0005102 signaling receptor binding; GO:0005488 binding; GO:0005515 protein binding; GO:0008134 transcription factor binding; GO:0019904 protein domain specific binding; GO:0035257 nuclear hormone receptor binding; GO:0051427 hormone receptor binding;
Q8BGV3	Tumor-associated calcium signal transducer 2 OS=Mus musculus OX=10090 GN=Tacstd2 PE=1 SV=1	Tacstd2	2.7646	4.13186e-07	Up	35.574	39.4	9	9	0.531622	0.453864	0.548526	0.885184	0.890178	0.900457	0.87386	0.848134	1.41015	1.42229	1.417	1.37897	1.43977	extracellular	K17288			GO:0001655 urogenital system development; GO:0001657 ureteric bud development; GO:0001822 kidney development; GO:0001823 mesonephros development; GO:0002009 morphogenesis of an epithelium; GO:0003008 system process; GO:0007154 cell communication; GO:0007155 cell adhesion; GO:0007162 negative regulation of cell adhesion; GO:0007165 signal transduction; GO:0007166 cell surface receptor signaling pa…	GO:0005576 extracellular region; GO:0005615 extracellular space; GO:0005622 intracellular; GO:0005623 cell; GO:0005634 nucleus; GO:0005737 cytoplasm; GO:0005829 cytosol; GO:0005886 plasma membrane; GO:0005887 integral component of plasma membrane; GO:0009925 basal plasma membrane; GO:0016020 membrane; GO:0016021 integral component of membrane; GO:0016323 basolateral plasma membrane; GO:0016328 la…	GO:0038023 signaling receptor activity; GO:0060089 molecular transducer activity;	PF00086	Thyroglobulin type-1 repeat
P05622	Platelet-derived growth factor receptor beta OS=Mus musculus OX=10090 GN=Pdgfrb PE=1 SV=2	Pdgfrb	2.7482	0.000128363	Up	122.79	17	13	13	0.408274	0.402853	0.657157	1.04052	1.01341	0.924437	0.925832	0.902214	1.39292	1.28358	1.3125	1.34754	1.38876	plasma membrane	K05089	PDGFRB; platelet-derived growth factor receptor beta [EC:2.7.10.1]	mmu04630 JAK-STAT signaling pathway; mmu05165 Human papillomavirus infection; mmu04810 Regulation of actin cytoskeleton; mmu04510 Focal adhesion; mmu04014 Ras signaling pathway; mmu04020 Calcium signaling pathway; mmu05218 Melanoma; mmu04540 Gap junction; mmu01521 EGFR tyrosine kinase inhibitor resistance; mmu05215 Prostate cancer; mmu04015 Rap1 signaling pathway; mmu04010 MAPK signaling pathway;…	GO:0000003 reproduction; GO:0000165 MAPK cascade; GO:0000302 response to reactive oxygen species; GO:0001101 response to acid chemical; GO:0001501 skeletal system development; GO:0001525 angiogenesis; GO:0001568 blood vessel development; GO:0001570 vasculogenesis; GO:0001654 eye development; GO:0001655 urogenital system development; GO:0001656 metanephros development; GO:0001701 in utero embryoni…	GO:0000323 lytic vacuole; GO:0005622 intracellular; GO:0005623 cell; GO:0005634 nucleus; GO:0005737 cytoplasm; GO:0005764 lysosome; GO:0005773 vacuole; GO:0005775 vacuolar lumen; GO:0005794 Golgi apparatus; GO:0005886 plasma membrane; GO:0009986 cell surface; GO:0012505 endomembrane system; GO:0016020 membrane; GO:0016324 apical plasma membrane; GO:0031224 intrinsic component of membrane; GO:0031…	GO:0003824 catalytic activity; GO:0004672 protein kinase activity; GO:0004713 protein tyrosine kinase activity; GO:0004714 transmembrane receptor protein tyrosine kinase activity; GO:0004888 transmembrane signaling receptor activity; GO:0004930 G protein-coupled receptor activity; GO:0004992 platelet activating factor receptor activity; GO:0005017 platelet-derived growth factor-activated receptor…	PF00047; PF13927; PF07714	Immunoglobulin domain; Immunoglobulin domain; Protein tyrosine kinase	T	KOG0200	Fibroblast/platelet-derived growth factor receptor and related receptor tyrosine kinases
Q8C0L0	Thioredoxin-related transmembrane protein 4 OS=Mus musculus OX=10090 GN=Tmx4 PE=1 SV=2	Tmx4	2.747	0.000203809	Up	37.131	13.7	3	3		0.517923	0.563331	0.624458	0.789547	0.665524		0.413693	1.50227	1.76895	1.27802	1.30114	1.57514	plasma membrane				GO:0006457 protein folding; GO:0006950 response to stress; GO:0009987 cellular process; GO:0033554 cellular response to stress; GO:0034976 response to endoplasmic reticulum stress; GO:0050896 response to stimulus; GO:0051716 cellular response to stimulus;	GO:0005622 intracellular; GO:0005623 cell; GO:0005737 cytoplasm; GO:0005783 endoplasmic reticulum; GO:0012505 endomembrane system; GO:0043226 organelle; GO:0043227 membrane-bounded organelle; GO:0043229 intracellular organelle; GO:0043231 intracellular membrane-bounded organelle;	GO:0003756 protein disulfide isomerase activity; GO:0003824 catalytic activity; GO:0016853 isomerase activity; GO:0016860 intramolecular oxidoreductase activity; GO:0016864 intramolecular oxidoreductase activity, transposing S-S bonds; GO:0140096 catalytic activity, acting on a protein;	PF00085	Thioredoxin	CO	KOG0913	Thiol-disulfide isomerase and thioredoxin
Q80YS6	Actin filament-associated protein 1 OS=Mus musculus OX=10090 GN=Afap1 PE=1 SV=1	Afap1	2.7362	0.000878026	Up	80.614	13.4	5	5	0.722878	0.420691	0.369954	0.913653	1.0224	0.926809	0.749944	0.971383	1.65726	1.13854	1.34222	1.44623	1.31804	nucleus	K18616			GO:0007154 cell communication; GO:0007165 signal transduction; GO:0009605 response to external stimulus; GO:0009612 response to mechanical stimulus; GO:0009628 response to abiotic stimulus; GO:0009966 regulation of signal transduction; GO:0009987 cellular process; GO:0010646 regulation of cell communication; GO:0023051 regulation of signaling; GO:0023052 signaling; GO:0048583 regulation of respon…	GO:0005622 intracellular; GO:0005623 cell; GO:0005737 cytoplasm; GO:0005829 cytosol; GO:0005856 cytoskeleton; GO:0005884 actin filament; GO:0005912 adherens junction; GO:0005925 focal adhesion; GO:0015629 actin cytoskeleton; GO:0030054 cell junction; GO:0030055 cell-substrate junction; GO:0043226 organelle; GO:0043228 non-membrane-bounded organelle; GO:0043229 intracellular organelle; GO:0043232 …	GO:0005488 binding; GO:0005515 protein binding; GO:0017124 SH3 domain binding; GO:0019904 protein domain specific binding; GO:0042169 SH2 domain binding;	PF00169	PH domain
Q08879	Fibulin-1 OS=Mus musculus OX=10090 GN=Fbln1 PE=1 SV=2	Fbln1	2.7025	1.23504e-07	Up	78.032	23.3	11	11	0.562849	0.548497	0.48509	0.851325	0.811061	0.862022	0.813275	0.875333	1.45417	1.46189	1.41042	1.41412	1.44995	extracellular	K17307			GO:0001817 regulation of cytokine production; GO:0001818 negative regulation of cytokine production; GO:0001932 regulation of protein phosphorylation; GO:0001933 negative regulation of protein phosphorylation; GO:0002791 regulation of peptide secretion; GO:0002792 negative regulation of peptide secretion; GO:0006807 nitrogen compound metabolic process; GO:0006950 response to stress; GO:0007162 ne…	GO:0005576 extracellular region; GO:0005604 basement membrane; GO:0005615 extracellular space; GO:0031012 extracellular matrix; GO:0062023 collagen-containing extracellular matrix; GO:0071953 elastic fiber;	GO:0001968 fibronectin binding; GO:0005102 signaling receptor binding; GO:0005178 integrin binding; GO:0005198 structural molecule activity; GO:0005201 extracellular matrix structural constituent; GO:0005488 binding; GO:0005509 calcium ion binding; GO:0005515 protein binding; GO:0008022 protein C-terminus binding; GO:0008047 enzyme activator activity; GO:0016504 peptidase activator activity; GO:0…	PF07645; PF12662	Calcium-binding EGF domain; Complement Clr-like EGF-like	T	KOG1217	Fibrillins and related proteins containing Ca2+-binding EGF-like domains
P06797	Procathepsin L OS=Mus musculus OX=10090 GN=Ctsl PE=1 SV=2	Ctsl	2.6543	6.49817e-08	Up	37.547	43.1	9	9	0.635352	0.5869	0.577202	0.634787	0.633537	0.675234	0.661624	0.634868	1.53919	1.57083	1.64851	1.66091	1.54105	extracellular	K01365	CTSL; cathepsin L [EC:3.4.22.15]	mmu04612 Antigen processing and presentation; mmu04140 Autophagy - animal; mmu05418 Fluid shear stress and atherosclerosis; mmu05323 Rheumatoid arthritis; mmu04210 Apoptosis; mmu04142 Lysosome; mmu05205 Proteoglycans in cancer; mmu04145 Phagosome	GO:0000003 reproduction; GO:0001701 in utero embryonic development; GO:0001890 placenta development; GO:0001892 embryonic placenta development; GO:0001893 maternal placenta development; GO:0001942 hair follicle development; GO:0001974 blood vessel remodeling; GO:0002009 morphogenesis of an epithelium; GO:0002376 immune system process; GO:0002478 antigen processing and presentation of exogenous pe…	GO:0000323 lytic vacuole; GO:0005576 extracellular region; GO:0005615 extracellular space; GO:0005622 intracellular; GO:0005623 cell; GO:0005634 nucleus; GO:0005730 nucleolus; GO:0005737 cytoplasm; GO:0005764 lysosome; GO:0005773 vacuole; GO:0005775 vacuolar lumen; GO:0005886 plasma membrane; GO:0005902 microvillus; GO:0009897 external side of plasma membrane; GO:0009986 cell surface; GO:0016020 …	GO:0003824 catalytic activity; GO:0004175 endopeptidase activity; GO:0004177 aminopeptidase activity; GO:0004180 carboxypeptidase activity; GO:0004197 cysteine-type endopeptidase activity; GO:0004252 serine-type endopeptidase activity; GO:0005488 binding; GO:0005515 protein binding; GO:0008233 peptidase activity; GO:0008234 cysteine-type peptidase activity; GO:0008236 serine-type peptidase activi…	PF08246; PF00112	Cathepsin propeptide inhibitor domain (I29); Papain family cysteine protease	O	KOG1543	Cysteine proteinase Cathepsin L
O55176	E3 ubiquitin-protein ligase Praja-1 OS=Mus musculus OX=10090 GN=Pja1 PE=1 SV=3	Pja1	2.6476	0.00949014	Up	63.905	9.5	3	2	0.638866	0.35496		0.775328	0.725771	0.864599	1.06223		1.03559	1.76328	0.962793	1.44582	1.37076	nucleus	K10633			GO:0006464 cellular protein modification process; GO:0006807 nitrogen compound metabolic process; GO:0008152 metabolic process; GO:0009056 catabolic process; GO:0009057 macromolecule catabolic process; GO:0009987 cellular process; GO:0016567 protein ubiquitination; GO:0019538 protein metabolic process; GO:0030163 protein catabolic process; GO:0032446 protein modification by small protein conjugat…	GO:0005622 intracellular; GO:0005623 cell; GO:0005737 cytoplasm;	GO:0003824 catalytic activity; GO:0004842 ubiquitin-protein transferase activity; GO:0016740 transferase activity; GO:0019787 ubiquitin-like protein transferase activity; GO:0061630 ubiquitin protein ligase activity; GO:0061659 ubiquitin-like protein ligase activity; GO:0140096 catalytic activity, acting on a protein;	PF13639	Ring finger domain	O	KOG0800	FOG: Predicted E3 ubiquitin ligase
P28798	Progranulin OS=Mus musculus OX=10090 GN=Grn PE=1 SV=2	Grn	2.6324	7.31966e-09	Up	63.458	22.4	8	8	0.560194	0.527199	0.518688	0.911076	0.878699	0.867598	0.847866	0.842375	1.39752	1.42661	1.36655	1.41201	1.44361	extracellular	K23879			GO:0000003 reproduction; GO:0001701 in utero embryonic development; GO:0001775 cell activation; GO:0001824 blastocyst development; GO:0001835 blastocyst hatching; GO:0002252 immune effector process; GO:0002263 cell activation involved in immune response; GO:0002274 myeloid leukocyte activation; GO:0002275 myeloid cell activation involved in immune response; GO:0002283 neutrophil activation involv…	GO:0000323 lytic vacuole; GO:0005576 extracellular region; GO:0005615 extracellular space; GO:0005622 intracellular; GO:0005623 cell; GO:0005737 cytoplasm; GO:0005764 lysosome; GO:0005766 primary lysosome; GO:0005768 endosome; GO:0005773 vacuole; GO:0005775 vacuolar lumen; GO:0005783 endoplasmic reticulum; GO:0012505 endomembrane system; GO:0030141 secretory granule; GO:0031410 cytoplasmic vesicl…	GO:0005102 signaling receptor binding; GO:0005488 binding; GO:0005515 protein binding; GO:0008083 growth factor activity; GO:0030545 receptor regulator activity; GO:0048018 receptor ligand activity; GO:0098772 molecular function regulator;			T	KOG4296	Epithelin/granulin
E9PV24	Fibrinogen alpha chain OS=Mus musculus OX=10090 GN=Fga PE=1 SV=1	Fga	2.621	1.81703e-10	Up	87.428	45.1	32	31	0.684989	0.679996	0.705808	0.378114	0.380358	0.383389	0.379853	0.36159	1.81842	1.78544	1.79346	1.80341	1.84517	extracellular	K03903	FGA; fibrinogen alpha chain	mmu05171 Coronavirus disease - COVID-19; mmu04610 Complement and coagulation cascades; mmu04611 Platelet activation	GO:0001775 cell activation; GO:0001889 liver development; GO:0001932 regulation of protein phosphorylation; GO:0001934 positive regulation of protein phosphorylation; GO:0002218 activation of innate immune response; GO:0002221 pattern recognition receptor signaling pathway; GO:0002224 toll-like receptor signaling pathway; GO:0002253 activation of immune response; GO:0002376 immune system process;…	GO:0005576 extracellular region; GO:0005577 fibrinogen complex; GO:0005615 extracellular space; GO:0005622 intracellular; GO:0005623 cell; GO:0005737 cytoplasm; GO:0005783 endoplasmic reticulum; GO:0005788 endoplasmic reticulum lumen; GO:0005791 rough endoplasmic reticulum; GO:0005886 plasma membrane; GO:0005938 cell cortex; GO:0009897 external side of plasma membrane; GO:0009986 cell surface; GO…	GO:0005198 structural molecule activity;	PF12160; PF00147	Fibrinogen alpha C domain; Fibrinogen beta and gamma chains, C-terminal globular domain	S	KOG2579	Ficolin and related extracellular proteins
O35639	Annexin A3 OS=Mus musculus OX=10090 GN=Anxa3 PE=1 SV=4	Anxa3	2.62	1.19992e-10	Up	36.384	66.6	19	19	0.593323	0.580425	0.578206	0.710851	0.722447	0.730257	0.718543	0.71588	1.52926	1.55618	1.51187	1.50388	1.54888	cytoplasm	K17089			GO:0001775 cell activation; GO:0002252 immune effector process; GO:0002263 cell activation involved in immune response; GO:0002274 myeloid leukocyte activation; GO:0002275 myeloid cell activation involved in immune response; GO:0002283 neutrophil activation involved in immune response; GO:0002366 leukocyte activation involved in immune response; GO:0002376 immune system process; GO:0002443 leukoc…	GO:0005622 intracellular; GO:0005623 cell; GO:0005737 cytoplasm; GO:0005829 cytosol; GO:0005886 plasma membrane; GO:0012505 endomembrane system; GO:0012506 vesicle membrane; GO:0016020 membrane; GO:0030139 endocytic vesicle; GO:0030141 secretory granule; GO:0030424 axon; GO:0030425 dendrite; GO:0030659 cytoplasmic vesicle membrane; GO:0030666 endocytic vesicle membrane; GO:0030670 phagocytic vesi…	GO:0004857 enzyme inhibitor activity; GO:0004859 phospholipase inhibitor activity; GO:0005488 binding; GO:0005515 protein binding; GO:0005543 phospholipid binding; GO:0005544 calcium-dependent phospholipid binding; GO:0008289 lipid binding; GO:0019834 phospholipase A2 inhibitor activity; GO:0030234 enzyme regulator activity; GO:0043167 ion binding; GO:0043168 anion binding; GO:0048306 calcium-dep…			U	KOG0819	Annexin
Q9DBS1	Transmembrane protein 43 OS=Mus musculus OX=10090 GN=Tmem43 PE=1 SV=1	Tmem43	2.6022	6.41315e-08	Up	44.783	44.5	12	12	0.586525	0.544979	0.530445	0.838052	0.819328	0.833827	0.82918	0.809673	1.46717	1.42862	1.42957	1.3745	1.50813	plasma membrane				GO:0006996 organelle organization; GO:0006997 nucleus organization; GO:0006998 nuclear envelope organization; GO:0009987 cellular process; GO:0010256 endomembrane system organization; GO:0016043 cellular component organization; GO:0061024 membrane organization; GO:0071763 nuclear membrane organization; GO:0071840 cellular component organization or biogenesis;	GO:0005622 intracellular; GO:0005623 cell; GO:0005634 nucleus; GO:0005635 nuclear envelope; GO:0005637 nuclear inner membrane; GO:0005639 integral component of nuclear inner membrane; GO:0005737 cytoplasm; GO:0005783 endoplasmic reticulum; GO:0005788 endoplasmic reticulum lumen; GO:0005794 Golgi apparatus; GO:0012505 endomembrane system; GO:0016020 membrane; GO:0016021 integral component of membr…	GO:0005488 binding; GO:0005515 protein binding; GO:0043621 protein self-association;
Q8VC19	5-aminolevulinate synthase, nonspecific, mitochondrial OS=Mus musculus OX=10090 GN=Alas1 PE=1 SV=2	Alas1	2.5619	3.97742e-06	Up	71.017	34.9	14	14	0.565402	0.538689	0.657258	0.814567	0.742832	0.728338	0.738013	0.694359	1.4167	1.42391	1.67144	1.48102	1.52747	mitochondria	K00643	E2.3.1.37; 5-aminolevulinate synthase [EC:2.3.1.37]	mmu00260 Glycine, serine and threonine metabolism; mmu01100 Metabolic pathways; mmu00860 Porphyrin and chlorophyll metabolism; mmu01240 Biosynthesis of cofactors	GO:0001666 response to hypoxia; GO:0006725 cellular aromatic compound metabolic process; GO:0006778 porphyrin-containing compound metabolic process; GO:0006779 porphyrin-containing compound biosynthetic process; GO:0006783 heme biosynthetic process; GO:0006807 nitrogen compound metabolic process; GO:0006950 response to stress; GO:0006996 organelle organization; GO:0007005 mitochondrion organizati…	GO:0005622 intracellular; GO:0005623 cell; GO:0005634 nucleus; GO:0005654 nucleoplasm; GO:0005737 cytoplasm; GO:0005739 mitochondrion; GO:0005759 mitochondrial matrix; GO:0005829 cytosol; GO:0031974 membrane-enclosed lumen; GO:0031981 nuclear lumen; GO:0043226 organelle; GO:0043227 membrane-bounded organelle; GO:0043229 intracellular organelle; GO:0043231 intracellular membrane-bounded organelle;…	GO:0003824 catalytic activity; GO:0003870 5-aminolevulinate synthase activity; GO:0005488 binding; GO:0005515 protein binding; GO:0016410 N-acyltransferase activity; GO:0016740 transferase activity; GO:0016746 transferase activity, transferring acyl groups; GO:0016747 transferase activity, transferring acyl groups other than amino-acyl groups; GO:0016748 succinyltransferase activity; GO:0016749 N…	PF09029; PF00155	5-aminolevulinate synthase presequence; Aminotransferase class I and II	H	KOG1360	5-aminolevulinate synthase
Q9QXS1	Plectin OS=Mus musculus OX=10090 GN=Plec PE=1 SV=3	Plec	2.5577	1.32395e-11	Up	534.18	45.3	172	168	0.552673	0.554149	0.548886	0.855064	0.859171	0.858626	0.855674	0.857727	1.42144	1.42814	1.41569	1.38653	1.40623	nucleus	K10388			GO:0000003 reproduction; GO:0006996 organelle organization; GO:0007010 cytoskeleton organization; GO:0007044 cell-substrate junction assembly; GO:0007565 female pregnancy; GO:0007584 response to nutrient; GO:0009605 response to external stimulus; GO:0009888 tissue development; GO:0009987 cellular process; GO:0009991 response to extracellular stimulus; GO:0016043 cellular component organization; G…	GO:0005622 intracellular; GO:0005623 cell; GO:0005737 cytoplasm; GO:0005829 cytosol; GO:0005856 cytoskeleton; GO:0005886 plasma membrane; GO:0005903 brush border; GO:0005912 adherens junction; GO:0005925 focal adhesion; GO:0009925 basal plasma membrane; GO:0016020 membrane; GO:0016323 basolateral plasma membrane; GO:0016324 apical plasma membrane; GO:0016528 sarcoplasm; GO:0030016 myofibril; GO:0…	GO:0005198 structural molecule activity; GO:0005200 structural constituent of cytoskeleton; GO:0005488 binding; GO:0005515 protein binding; GO:0008092 cytoskeletal protein binding; GO:0008307 structural constituent of muscle; GO:0030506 ankyrin binding; GO:0047485 protein N-terminus binding;	PF03501; PF00307	Plectin/S10 domain; Calponin homology (CH) domain	Z	KOG3344	40s ribosomal protein s10
P97452	Ribosome biogenesis protein BOP1 OS=Mus musculus OX=10090 GN=Bop1 PE=1 SV=1	Bop1	2.5506	4.73327e-05	Up	82.545	17.9	9	9	0.678787	0.638785	0.459046	0.783951	0.833169	0.783555	0.709686	0.560534	1.433	1.53375	1.46619	1.56363	1.55592	nucleus	K14824			GO:0000027 ribosomal large subunit assembly; GO:0000448 cleavage in ITS2 between 5.8S rRNA and LSU-rRNA of tricistronic rRNA transcript (SSU-rRNA, 5.8S rRNA, LSU-rRNA); GO:0000460 maturation of 5.8S rRNA; GO:0000463 maturation of LSU-rRNA from tricistronic rRNA transcript (SSU-rRNA, 5.8S rRNA, LSU-rRNA); GO:0000466 maturation of 5.8S rRNA from tricistronic rRNA transcript (SSU-rRNA, 5.8S rRNA, LS…	GO:0005622 intracellular; GO:0005623 cell; GO:0005634 nucleus; GO:0005654 nucleoplasm; GO:0005730 nucleolus; GO:0030684 preribosome; GO:0030686 90S preribosome; GO:0030687 preribosome, large subunit precursor; GO:0031974 membrane-enclosed lumen; GO:0031981 nuclear lumen; GO:0032991 protein-containing complex; GO:0043226 organelle; GO:0043227 membrane-bounded organelle; GO:0043228 non-membrane-bou…	GO:0005488 binding; GO:0043021 ribonucleoprotein complex binding; GO:0044877 protein-containing complex binding;	PF08145	BOP1NT (NUC169) domain	J	KOG0650	WD40 repeat nucleolar protein Bop1, involved in ribosome biogenesis
Q8VI75	Importin-4 OS=Mus musculus OX=10090 GN=Ipo4 PE=1 SV=1	Ipo4	2.55	2.30387e-07	Up	119.27	16.4	12	12	0.565237	0.58022	0.656534	0.728792	0.713156	0.70641	0.760561	0.630702	1.56079	1.57058	1.52905	1.51759	1.48038	cytoplasm	K20221			GO:0006323 DNA packaging; GO:0006325 chromatin organization; GO:0006333 chromatin assembly or disassembly; GO:0006334 nucleosome assembly; GO:0006335 DNA replication-dependent nucleosome assembly; GO:0006336 DNA replication-independent nucleosome assembly; GO:0006606 protein import into nucleus; GO:0006607 NLS-bearing protein import into nucleus; GO:0006610 ribosomal protein import into nucleus; …	GO:0000228 nuclear chromosome; GO:0000785 chromatin; GO:0000790 nuclear chromatin; GO:0005622 intracellular; GO:0005623 cell; GO:0005634 nucleus; GO:0005635 nuclear envelope; GO:0005694 chromosome; GO:0005737 cytoplasm; GO:0012505 endomembrane system; GO:0016020 membrane; GO:0031090 organelle membrane; GO:0031965 nuclear membrane; GO:0031967 organelle envelope; GO:0031974 membrane-enclosed lumen;…	GO:0005048 signal sequence binding; GO:0005215 transporter activity; GO:0005488 binding; GO:0008139 nuclear localization sequence binding; GO:0033218 amide binding; GO:0042277 peptide binding;			UY	KOG2171	Karyopherin (importin) beta 3
P59729	Ras and Rab interactor 3 OS=Mus musculus OX=10090 GN=Rin3 PE=1 SV=2	Rin3	2.5468	0.0382822	Up	107.22	10.4	7	7	0.542544	0.470768			2.02223	0.402728	0.978053	0.712663	1.18717		1.77045		0.913399	nucleus	K23687			GO:0006810 transport; GO:0006897 endocytosis; GO:0016192 vesicle-mediated transport; GO:0051179 localization; GO:0051234 establishment of localization; GO:0065007 biological regulation; GO:0065009 regulation of molecular function; GO:0098657 import into cell;	GO:0005622 intracellular; GO:0005623 cell; GO:0005737 cytoplasm; GO:0005768 endosome; GO:0005769 early endosome; GO:0005829 cytosol; GO:0012505 endomembrane system; GO:0031410 cytoplasmic vesicle; GO:0031982 vesicle; GO:0043226 organelle; GO:0043227 membrane-bounded organelle; GO:0043229 intracellular organelle; GO:0097708 intracellular vesicle;	GO:0005085 guanyl-nucleotide exchange factor activity; GO:0005088 Ras guanyl-nucleotide exchange factor activity; GO:0005488 binding; GO:0005515 protein binding; GO:0017016 Ras GTPase binding; GO:0017112 Rab guanyl-nucleotide exchange factor activity; GO:0017137 Rab GTPase binding; GO:0019899 enzyme binding; GO:0031267 small GTPase binding; GO:0051020 GTPase binding; GO:0098772 molecular function…			U	KOG2320	RAS effector RIN1 (contains VPS domain)
P41731	CD63 antigen OS=Mus musculus OX=10090 GN=Cd63 PE=1 SV=2	Cd63	2.5328	5.35846e-07	Up	25.766	12.2	2	2	0.560115	0.665621	0.594503	0.705131	0.687757	0.700189	0.749763	0.653215	1.45152	1.56645	1.53476	1.56421	1.56676	plasma membrane	K06497	CD63; CD63 antigen	mmu04142 Lysosome; mmu05205 Proteoglycans in cancer	GO:0001775 cell activation; GO:0002090 regulation of receptor internalization; GO:0002092 positive regulation of receptor internalization; GO:0002252 immune effector process; GO:0002263 cell activation involved in immune response; GO:0002274 myeloid leukocyte activation; GO:0002275 myeloid cell activation involved in immune response; GO:0002283 neutrophil activation involved in immune response; G…	GO:0000323 lytic vacuole; GO:0005576 extracellular region; GO:0005615 extracellular space; GO:0005622 intracellular; GO:0005623 cell; GO:0005737 cytoplasm; GO:0005764 lysosome; GO:0005765 lysosomal membrane; GO:0005766 primary lysosome; GO:0005768 endosome; GO:0005770 late endosome; GO:0005771 multivesicular body; GO:0005773 vacuole; GO:0005774 vacuolar membrane; GO:0005886 plasma membrane; GO:00…	GO:0005488 binding; GO:0044877 protein-containing complex binding;			U	KOG3882	Tetraspanin family integral membrane protein
Q8R3C0	Mini-chromosome maintenance complex-binding protein OS=Mus musculus OX=10090 GN=Mcmbp PE=1 SV=1	Mcmbp	2.5271	9.53932e-06	Up	72.89	21.7	9	9	0.505741	0.624615	0.674586	0.787446	0.434711	0.718678	0.768223	0.883868	1.49249	1.53672	1.51247	1.43674	1.62372	cytoplasm				GO:0000819 sister chromatid segregation; GO:0006139 nucleobase-containing compound metabolic process; GO:0006259 DNA metabolic process; GO:0006260 DNA replication; GO:0006261 DNA-dependent DNA replication; GO:0006725 cellular aromatic compound metabolic process; GO:0006807 nitrogen compound metabolic process; GO:0006996 organelle organization; GO:0007049 cell cycle; GO:0007059 chromosome segregat…	GO:0000228 nuclear chromosome; GO:0000785 chromatin; GO:0000790 nuclear chromatin; GO:0005622 intracellular; GO:0005623 cell; GO:0005634 nucleus; GO:0005654 nucleoplasm; GO:0005694 chromosome; GO:0005737 cytoplasm; GO:0005829 cytosol; GO:0005886 plasma membrane; GO:0016020 membrane; GO:0031974 membrane-enclosed lumen; GO:0031981 nuclear lumen; GO:0032991 protein-containing complex; GO:0042555 MCM…	GO:0003682 chromatin binding; GO:0005488 binding;			S	KOG2545	Conserved membrane protein
Q921U8	Smoothelin OS=Mus musculus OX=10090 GN=Smtn PE=1 SV=2	Smtn	2.5259	6.09736e-05	Up	100.29	17.7	12	12	0.486211	0.734486	0.535968	0.746566	0.78225	0.784058	0.707683	0.827509	1.37266	1.45344	1.51463	1.53777	1.51678	nucleus				GO:0003008 system process; GO:0003013 circulatory system process; GO:0003073 regulation of systemic arterial blood pressure; GO:0003085 negative regulation of systemic arterial blood pressure; GO:0006937 regulation of muscle contraction; GO:0006942 regulation of striated muscle contraction; GO:0008015 blood circulation; GO:0008016 regulation of heart contraction; GO:0008217 regulation of blood pr…		GO:0003779 actin binding; GO:0005488 binding; GO:0005515 protein binding; GO:0008092 cytoskeletal protein binding;	PF00307	Calponin homology (CH) domain	Z	KOG4678	FOG: Calponin homology domain
Q5SXY1	Cytospin-B OS=Mus musculus OX=10090 GN=Specc1 PE=1 SV=2	Specc1	2.516	1.2911e-05	Up	118.1	16.3	11	11	0.522497	0.526338	0.687353	0.699476	0.833045	0.850667	0.847216	0.75301	1.49026	1.43438	1.40737	1.38803	1.56036	nucleus	K23028				GO:0005622 intracellular; GO:0005623 cell; GO:0005634 nucleus; GO:0043226 organelle; GO:0043227 membrane-bounded organelle; GO:0043229 intracellular organelle; GO:0043231 intracellular membrane-bounded organelle;		PF00307	Calponin homology (CH) domain	Z	KOG4678	FOG: Calponin homology domain
P10107	Annexin A1 OS=Mus musculus OX=10090 GN=Anxa1 PE=1 SV=2	Anxa1	2.513	7.54033e-09	Up	38.734	60.7	18	18	0.524749	0.528122	0.523115	0.954583	0.989469	0.982374	0.950861	0.945854	1.33553	1.38691	1.30779	1.26575	1.3049	cytoplasm	K17091			GO:0000003 reproduction; GO:0000302 response to reactive oxygen species; GO:0001655 urogenital system development; GO:0001775 cell activation; GO:0001776 leukocyte homeostasis; GO:0001780 neutrophil homeostasis; GO:0001817 regulation of cytokine production; GO:0001818 negative regulation of cytokine production; GO:0001819 positive regulation of cytokine production; GO:0001889 liver development; G…	GO:0000323 lytic vacuole; GO:0001533 cornified envelope; GO:0005576 extracellular region; GO:0005615 extracellular space; GO:0005622 intracellular; GO:0005623 cell; GO:0005634 nucleus; GO:0005654 nucleoplasm; GO:0005737 cytoplasm; GO:0005739 mitochondrion; GO:0005740 mitochondrial envelope; GO:0005764 lysosome; GO:0005768 endosome; GO:0005769 early endosome; GO:0005773 vacuole; GO:0005829 cytosol…	GO:0003676 nucleic acid binding; GO:0003677 DNA binding; GO:0003697 single-stranded DNA binding; GO:0003824 catalytic activity; GO:0004857 enzyme inhibitor activity; GO:0004859 phospholipase inhibitor activity; GO:0005102 signaling receptor binding; GO:0005198 structural molecule activity; GO:0005488 binding; GO:0005509 calcium ion binding; GO:0005515 protein binding; GO:0005543 phospholipid bind…			U	KOG0819	Annexin
Q91X17	Uromodulin OS=Mus musculus OX=10090 GN=Umod PE=1 SV=1	Umod	2.5107	1.22342e-09	Up	70.844	45	24	24	0.23624	0.2469	0.245995	1.86468	1.84208	1.85492	1.80716	1.85097	0.616272	0.613441	0.613782	0.59087	0.616692	extracellular	K18274			GO:0001655 urogenital system development; GO:0001656 metanephros development; GO:0001822 kidney development; GO:0002376 immune system process; GO:0003008 system process; GO:0006928 movement of cell or subcellular component; GO:0006950 response to stress; GO:0006952 defense response; GO:0006968 cellular defense response; GO:0007155 cell adhesion; GO:0007157 heterophilic cell-cell adhesion via plas…	GO:0000922 spindle pole; GO:0005576 extracellular region; GO:0005615 extracellular space; GO:0005622 intracellular; GO:0005623 cell; GO:0005737 cytoplasm; GO:0005794 Golgi apparatus; GO:0005796 Golgi lumen; GO:0005819 spindle; GO:0005856 cytoskeleton; GO:0005886 plasma membrane; GO:0005929 cilium; GO:0012505 endomembrane system; GO:0015630 microtubule cytoskeleton; GO:0016020 membrane; GO:0016323…	GO:0005488 binding; GO:0019864 IgG binding; GO:0019865 immunoglobulin binding; GO:0044877 protein-containing complex binding;	PF07645; PF12947	Calcium-binding EGF domain; EGF domain
Q3TKT4	Transcription activator BRG1 OS=Mus musculus OX=10090 GN=Smarca4 PE=1 SV=1	Smarca4	2.508	0.0118694	Up	181.43	11.3	14	6	0.532798	0.640562		0.837277	0.726665	0.590039	0.748379	0.567385	1.19814	1.9302	0.985567	1.93891	1.30407	nucleus	K11647	SMARCA2_4; SWI/SNF-related matrix-associated actin-dependent regulator of chromatin subfamily A member 2/4 [EC:3.6.4.-]	mmu04714 Thermogenesis; mmu05225 Hepatocellular carcinoma	GO:0000003 reproduction; GO:0000122 negative regulation of transcription by RNA polymerase II; GO:0000902 cell morphogenesis; GO:0001188 RNA polymerase I preinitiation complex assembly; GO:0001558 regulation of cell growth; GO:0001568 blood vessel development; GO:0001570 vasculogenesis; GO:0001654 eye development; GO:0001701 in utero embryonic development; GO:0001709 cell fate determination; GO:0…	GO:0000228 nuclear chromosome; GO:0000785 chromatin; GO:0000790 nuclear chromatin; GO:0000791 euchromatin; GO:0000792 heterochromatin; GO:0005622 intracellular; GO:0005623 cell; GO:0005634 nucleus; GO:0005694 chromosome; GO:0005719 nuclear euchromatin; GO:0005726 perichromatin fibrils; GO:0016514 SWI/SNF complex; GO:0031974 membrane-enclosed lumen; GO:0031981 nuclear lumen; GO:0032991 protein-con…	GO:0000976 transcription regulatory region sequence-specific DNA binding; GO:0000977 RNA polymerase II transcription regulatory region sequence-specific DNA binding; GO:0000978 RNA polymerase II cis-regulatory region sequence-specific DNA binding; GO:0000987 cis-regulatory region sequence-specific DNA binding; GO:0001046 core promoter sequence-specific DNA binding; GO:0001067 regulatory region nu…	PF08880; PF07529; PF07533; PF00439	QLQ; HSA; BRK domain; Bromodomain	K	KOG0386	Chromatin remodeling complex SWI/SNF, component SWI2 and related ATPases (DNA/RNA helicase superfamily)
Q60716	Prolyl 4-hydroxylase subunit alpha-2 OS=Mus musculus OX=10090 GN=P4ha2 PE=1 SV=1	P4ha2	2.5061	6.10509e-05	Up	61.001	31.7	11	11	0.688895	0.473891	0.513462	0.93926	0.829049	0.740072	0.983248	0.830654	1.42555	1.33536	1.27587	1.54882	1.41586	extracellular	K00472	P4HA; prolyl 4-hydroxylase [EC:1.14.11.2]	mmu00330 Arginine and proline metabolism; mmu01100 Metabolic pathways	GO:0006082 organic acid metabolic process; GO:0006091 generation of precursor metabolites and energy; GO:0006464 cellular protein modification process; GO:0006520 cellular amino acid metabolic process; GO:0006575 cellular modified amino acid metabolic process; GO:0006807 nitrogen compound metabolic process; GO:0008152 metabolic process; GO:0009987 cellular process; GO:0018126 protein hydroxylatio…	GO:0005622 intracellular; GO:0005623 cell; GO:0005634 nucleus; GO:0005654 nucleoplasm; GO:0005737 cytoplasm; GO:0005783 endoplasmic reticulum; GO:0005788 endoplasmic reticulum lumen; GO:0005829 cytosol; GO:0012505 endomembrane system; GO:0016222 procollagen-proline 4-dioxygenase complex; GO:0031974 membrane-enclosed lumen; GO:0031981 nuclear lumen; GO:0032991 protein-containing complex; GO:004322…	GO:0003824 catalytic activity; GO:0004656 procollagen-proline 4-dioxygenase activity; GO:0009055 electron transfer activity; GO:0016491 oxidoreductase activity; GO:0016705 oxidoreductase activity, acting on paired donors, with incorporation or reduction of molecular oxygen; GO:0016706 2-oxoglutarate-dependent dioxygenase activity; GO:0019798 procollagen-proline dioxygenase activity; GO:0031543 pe…	PF13640	2OG-Fe(II) oxygenase superfamily	E	KOG1591	Prolyl 4-hydroxylase alpha subunit
Q8VCM7	Fibrinogen gamma chain OS=Mus musculus OX=10090 GN=Fgg PE=1 SV=1	Fgg	2.5054	1.43018e-11	Up	49.391	59.9	25	25	0.727156	0.716801	0.71918	0.34736	0.369667	0.366862	0.371102	0.349181	1.83743	1.81324	1.79463	1.79051	1.79689	extracellular	K03905	FGG; fibrinogen gamma chain	mmu05171 Coronavirus disease - COVID-19; mmu05150 Staphylococcus aureus infection; mmu04610 Complement and coagulation cascades; mmu04611 Platelet activation	GO:0001775 cell activation; GO:0001932 regulation of protein phosphorylation; GO:0001934 positive regulation of protein phosphorylation; GO:0002218 activation of innate immune response; GO:0002221 pattern recognition receptor signaling pathway; GO:0002224 toll-like receptor signaling pathway; GO:0002253 activation of immune response; GO:0002376 immune system process; GO:0002576 platelet degranula…	GO:0005576 extracellular region; GO:0005577 fibrinogen complex; GO:0005615 extracellular space; GO:0005622 intracellular; GO:0005623 cell; GO:0005737 cytoplasm; GO:0005783 endoplasmic reticulum; GO:0005788 endoplasmic reticulum lumen; GO:0005886 plasma membrane; GO:0005938 cell cortex; GO:0009897 external side of plasma membrane; GO:0009986 cell surface; GO:0012505 endomembrane system; GO:0016020…	GO:0005102 signaling receptor binding; GO:0005198 structural molecule activity; GO:0005488 binding; GO:0005515 protein binding; GO:0042802 identical protein binding; GO:0042803 protein homodimerization activity; GO:0046983 protein dimerization activity; GO:0050839 cell adhesion molecule binding;	PF00147	Fibrinogen beta and gamma chains, C-terminal globular domain	T	KOG2579	Ficolin and related extracellular proteins
P24452	Macrophage-capping protein OS=Mus musculus OX=10090 GN=Capg PE=1 SV=2	Capg	2.5012	3.32214e-07	Up	39.24	41.2	10	10	0.479868	0.522924	0.555492	0.971825	0.980793	0.999509	0.971145	1.02237	1.35365	1.30501	1.29448	1.22436	1.31858	cytoplasm,nucleus	K10368			GO:0002376 immune system process; GO:0006950 response to stress; GO:0006952 defense response; GO:0006955 immune response; GO:0008064 regulation of actin polymerization or depolymerization; GO:0009987 cellular process; GO:0010033 response to organic substance; GO:0010639 negative regulation of organelle organization; GO:0016043 cellular component organization; GO:0022607 cellular component assembl…	GO:0005622 intracellular; GO:0005623 cell; GO:0005634 nucleus; GO:0005654 nucleoplasm; GO:0005730 nucleolus; GO:0005737 cytoplasm; GO:0005814 centriole; GO:0005815 microtubule organizing center; GO:0005819 spindle; GO:0005856 cytoskeleton; GO:0008290 F-actin capping protein complex; GO:0015629 actin cytoskeleton; GO:0015630 microtubule cytoskeleton; GO:0030139 endocytic vesicle; GO:0030496 midbod…	GO:0005488 binding; GO:0005515 protein binding; GO:0019904 protein domain specific binding; GO:0044877 protein-containing complex binding;	PF00626	Gelsolin repeat	Z	KOG0443	Actin regulatory proteins (gelsolin/villin family)
Q5SF07	Insulin-like growth factor 2 mRNA-binding protein 2 OS=Mus musculus OX=10090 GN=Igf2bp2 PE=1 SV=1	Igf2bp2	2.498	1.86968e-06	Up	65.583	13.2	6	5	0.59736	0.49365	0.586316	0.933512	0.920185	0.834095	0.836078	0.815572	1.3874	1.46393	1.40563	1.42019	1.30608	cytoplasm	K17392			GO:0001817 regulation of cytokine production; GO:0006417 regulation of translation; GO:0009653 anatomical structure morphogenesis; GO:0009889 regulation of biosynthetic process; GO:0009890 negative regulation of biosynthetic process; GO:0009892 negative regulation of metabolic process; GO:0009894 regulation of catabolic process; GO:0010468 regulation of gene expression; GO:0010556 regulation of m…	GO:0005622 intracellular; GO:0005623 cell; GO:0005634 nucleus; GO:0005737 cytoplasm; GO:0005829 cytosol; GO:0005856 cytoskeleton; GO:0043226 organelle; GO:0043227 membrane-bounded organelle; GO:0043228 non-membrane-bounded organelle; GO:0043229 intracellular organelle; GO:0043231 intracellular membrane-bounded organelle; GO:0043232 intracellular non-membrane-bounded organelle;	GO:0003676 nucleic acid binding; GO:0003723 RNA binding; GO:0003729 mRNA binding; GO:0003730 mRNA 3'-UTR binding; GO:0005488 binding; GO:0045182 translation regulator activity; GO:0048027 mRNA 5'-UTR binding; GO:0097159 organic cyclic compound binding; GO:1901363 heterocyclic compound binding;	PF00076; PF00013	RNA recognition motif. (a.k.a. RRM, RBD, or RNP domain); KH domain	A	KOG2193	IGF-II mRNA-binding protein IMP, contains RRM and KH domains
P37804	Transgelin OS=Mus musculus OX=10090 GN=Tagln PE=1 SV=3	Tagln	2.4837	4.70838e-09	Up	22.576	76.6	16	16	0.573068	0.571317	0.601303	0.802522	0.808212	0.816563	0.79772	0.803102	1.45222	1.45222	1.42004	1.40715	1.49456	cytoplasm	K20526			GO:0009888 tissue development; GO:0009987 cellular process; GO:0030154 cell differentiation; GO:0030855 epithelial cell differentiation; GO:0032502 developmental process; GO:0048856 anatomical structure development; GO:0048869 cellular developmental process; GO:0060429 epithelium development;		GO:0003779 actin binding; GO:0005488 binding; GO:0005515 protein binding; GO:0008092 cytoskeletal protein binding; GO:0030674 protein-macromolecule adaptor activity; GO:0044877 protein-containing complex binding; GO:0051015 actin filament binding; GO:0060090 molecular adaptor activity;	PF00307	Calponin homology (CH) domain	Z	KOG2046	Calponin
Q75N73	Metal cation symporter ZIP14 OS=Mus musculus OX=10090 GN=Slc39a14 PE=1 SV=1	Slc39a14	2.4764	0.000406335	Up	53.961	8.6	2	2	0.462638	0.637844				0.441409	0.645057		1.44206	1.24175	1.37437	1.524	1.23088	plasma membrane	K14720	SLC39A14; solute carrier family 39 (zinc transporter), member 14	mmu04216 Ferroptosis	GO:0000041 transition metal ion transport; GO:0006810 transport; GO:0006811 ion transport; GO:0006812 cation transport; GO:0006826 iron ion transport; GO:0006828 manganese ion transport; GO:0006829 zinc ion transport; GO:0006873 cellular ion homeostasis; GO:0006875 cellular metal ion homeostasis; GO:0006882 cellular zinc ion homeostasis; GO:0009987 cellular process; GO:0019725 cellular homeostasi…	GO:0005622 intracellular; GO:0005623 cell; GO:0005737 cytoplasm; GO:0005886 plasma membrane; GO:0005887 integral component of plasma membrane; GO:0016020 membrane; GO:0016021 integral component of membrane; GO:0031224 intrinsic component of membrane; GO:0031226 intrinsic component of plasma membrane; GO:0071944 cell periphery;	GO:0005215 transporter activity; GO:0005381 iron ion transmembrane transporter activity; GO:0005384 manganese ion transmembrane transporter activity; GO:0005385 zinc ion transmembrane transporter activity; GO:0008324 cation transmembrane transporter activity; GO:0015075 ion transmembrane transporter activity; GO:0015093 ferrous iron transmembrane transporter activity; GO:0015318 inorganic molecul…			P	KOG2693	Putative zinc transporter
P23927	Alpha-crystallin B chain OS=Mus musculus OX=10090 GN=Cryab PE=1 SV=2	Cryab	2.4749	3.78638e-09	Up	20.069	66.3	10	10	0.70374	0.670837	0.697456	0.473287	0.481904	0.465333	0.474666	0.485987	1.73688	1.74547	1.7333	1.66097	1.67017	mitochondria	K09542	CRYAB; crystallin, alpha B	mmu04141 Protein processing in endoplasmic reticulum; mmu04213 Longevity regulating pathway - multiple species	GO:0000165 MAPK cascade; GO:0000226 microtubule cytoskeleton organization; GO:0000302 response to reactive oxygen species; GO:0001558 regulation of cell growth; GO:0001654 eye development; GO:0001666 response to hypoxia; GO:0002088 lens development in camera-type eye; GO:0003008 system process; GO:0003012 muscle system process; GO:0006457 protein folding; GO:0006464 cellular protein modification …	GO:0005622 intracellular; GO:0005623 cell; GO:0005634 nucleus; GO:0005654 nucleoplasm; GO:0005737 cytoplasm; GO:0005739 mitochondrion; GO:0005794 Golgi apparatus; GO:0005829 cytosol; GO:0005856 cytoskeleton; GO:0005886 plasma membrane; GO:0009986 cell surface; GO:0012505 endomembrane system; GO:0014069 postsynaptic density; GO:0015629 actin cytoskeleton; GO:0015630 microtubule cytoskeleton; GO:00…	GO:0001540 amyloid-beta binding; GO:0005198 structural molecule activity; GO:0005212 structural constituent of eye lens; GO:0005488 binding; GO:0005515 protein binding; GO:0008017 microtubule binding; GO:0008092 cytoskeletal protein binding; GO:0015631 tubulin binding; GO:0033218 amide binding; GO:0042277 peptide binding; GO:0042802 identical protein binding; GO:0042803 protein homodimerization a…			O	KOG3591	Alpha crystallins
Q91YN9	BAG family molecular chaperone regulator 2 OS=Mus musculus OX=10090 GN=Bag2 PE=1 SV=1	Bag2	2.4688	8.87926e-08	Up	23.473	32.9	7	7	0.635754	0.617763	0.644304	0.650723	0.667022	0.661507	0.645492	0.66861	1.57824	1.65135	1.60911	1.48319	1.48693	cytoplasm	K09556	BAG2; BCL2-associated athanogene 2	mmu04141 Protein processing in endoplasmic reticulum	GO:0006457 protein folding; GO:0006807 nitrogen compound metabolic process; GO:0008152 metabolic process; GO:0009892 negative regulation of metabolic process; GO:0009893 positive regulation of metabolic process; GO:0009894 regulation of catabolic process; GO:0009896 positive regulation of catabolic process; GO:0009987 cellular process; GO:0010468 regulation of gene expression; GO:0010604 positive…	GO:0005622 intracellular; GO:0005623 cell; GO:0005737 cytoplasm; GO:0005829 cytosol; GO:0030424 axon; GO:0030425 dendrite; GO:0032991 protein-containing complex; GO:0036477 somatodendritic compartment; GO:0042995 cell projection; GO:0043005 neuron projection; GO:0097447 dendritic tree; GO:0101031 chaperone complex; GO:0120025 plasma membrane bounded cell projection;	GO:0000166 nucleotide binding; GO:0000774 adenyl-nucleotide exchange factor activity; GO:0005488 binding; GO:0005515 protein binding; GO:0008092 cytoskeletal protein binding; GO:0017076 purine nucleotide binding; GO:0019899 enzyme binding; GO:0030234 enzyme regulator activity; GO:0030554 adenyl nucleotide binding; GO:0031072 heat shock protein binding; GO:0031625 ubiquitin protein ligase binding;…			O	KOG3633	BAG family molecular chaperone regulator 2
Q64373	Bcl-2-like protein 1 OS=Mus musculus OX=10090 GN=Bcl2l1 PE=1 SV=1	Bcl2l1	2.4594	0.000230568	Up	26.132	18.9	5	5	0.538079	0.864369	0.536136	0.623748	0.587182	0.683809	0.562339	0.65815	1.60198	1.69317	1.55043	1.57867	1.52194	extracellular,plasma membrane	K04570	BCL2L1; Bcl-2-like 1 (apoptosis regulator Bcl-X)	mmu04630 JAK-STAT signaling pathway; mmu04137 Mitophagy - animal; mmu05166 Human T-cell leukemia virus 1 infection; mmu05145 Toxoplasmosis; mmu04014 Ras signaling pathway; mmu04215 Apoptosis - multiple species; mmu01524 Platinum drug resistance; mmu01521 EGFR tyrosine kinase inhibitor resistance; mmu05162 Measles; mmu05225 Hepatocellular carcinoma; mmu04115 p53 signaling pathway; mmu05170 Human i…	GO:0000003 reproduction; GO:0000075 cell cycle checkpoint; GO:0000278 mitotic cell cycle; GO:0001101 response to acid chemical; GO:0001505 regulation of neurotransmitter levels; GO:0001541 ovarian follicle development; GO:0001701 in utero embryonic development; GO:0001836 release of cytochrome c from mitochondria; GO:0001956 positive regulation of neurotransmitter secretion; GO:0002931 response t…	GO:0005622 intracellular; GO:0005623 cell; GO:0005737 cytoplasm; GO:0005739 mitochondrion; GO:0005740 mitochondrial envelope; GO:0005741 mitochondrial outer membrane; GO:0005783 endoplasmic reticulum; GO:0005813 centrosome; GO:0005815 microtubule organizing center; GO:0005829 cytosol; GO:0005856 cytoskeleton; GO:0012505 endomembrane system; GO:0015630 microtubule cytoskeleton; GO:0016020 membrane…	GO:0004857 enzyme inhibitor activity; GO:0004866 endopeptidase inhibitor activity; GO:0004869 cysteine-type endopeptidase inhibitor activity; GO:0005488 binding; GO:0005515 protein binding; GO:0008134 transcription factor binding; GO:0019899 enzyme binding; GO:0019900 kinase binding; GO:0019901 protein kinase binding; GO:0019904 protein domain specific binding; GO:0030234 enzyme regulator activit…			T	KOG4728	Anti-apoptotic Bcl-2 family proteins, prevent opening of mitochondrial porin channel
Q9JLV1	BAG family molecular chaperone regulator 3 OS=Mus musculus OX=10090 GN=Bag3 PE=1 SV=2	Bag3	2.4581	2.20009e-07	Up	61.859	27.6	10	10	0.502986	0.586089	0.557043	0.932614	0.997186	0.863148	0.869874	0.947322	1.36634	1.38076	1.31371	1.34852	1.33441	nucleus	K09557			GO:0000122 negative regulation of transcription by RNA polymerase II; GO:0006355 regulation of transcription, DNA-templated; GO:0006357 regulation of transcription by RNA polymerase II; GO:0006457 protein folding; GO:0006915 apoptotic process; GO:0006950 response to stress; GO:0007154 cell communication; GO:0007165 signal transduction; GO:0007166 cell surface receptor signaling pathway; GO:000821…	GO:0005622 intracellular; GO:0005623 cell; GO:0005634 nucleus; GO:0005737 cytoplasm; GO:0005829 cytosol; GO:0005886 plasma membrane; GO:0016020 membrane; GO:0030016 myofibril; GO:0030017 sarcomere; GO:0030018 Z disc; GO:0031674 I band; GO:0042995 cell projection; GO:0043005 neuron projection; GO:0043226 organelle; GO:0043227 membrane-bounded organelle; GO:0043228 non-membrane-bounded organelle; G…	GO:0000166 nucleotide binding; GO:0000774 adenyl-nucleotide exchange factor activity; GO:0005488 binding; GO:0017076 purine nucleotide binding; GO:0030234 enzyme regulator activity; GO:0030554 adenyl nucleotide binding; GO:0036094 small molecule binding; GO:0044877 protein-containing complex binding; GO:0060589 nucleoside-triphosphatase regulator activity; GO:0060590 ATPase regulator activity; GO…	PF00397	WW domain	OT	KOG4361	BCL2-associated athanogene-like proteins and related BAG family chaperone regulators
Q9Z2V4	Phosphoenolpyruvate carboxykinase, cytosolic [GTP] OS=Mus musculus OX=10090 GN=Pck1 PE=1 SV=1	Pck1	2.4517	7.63124e-10	Up	69.354	81.7	42	41	0.606233	0.61713	0.633186	0.703313	0.715625	0.715417	0.708887	0.714003	1.5312	1.54035	1.52363	1.47642	1.5146	cytoplasm	K01596	E4.1.1.32; phosphoenolpyruvate carboxykinase (GTP) [EC:4.1.1.32]	mmu00620 Pyruvate metabolism; mmu04920 Adipocytokine signaling pathway; mmu03320 PPAR signaling pathway; mmu04922 Glucagon signaling pathway; mmu04931 Insulin resistance; mmu01100 Metabolic pathways; mmu04068 FoxO signaling pathway; mmu04964 Proximal tubule bicarbonate reclamation; mmu04151 PI3K-Akt signaling pathway; mmu04152 AMPK signaling pathway; mmu00020 Citrate cycle (TCA cycle); mmu00010 G…	GO:0001101 response to acid chemical; GO:0001666 response to hypoxia; GO:0002237 response to molecule of bacterial origin; GO:0005975 carbohydrate metabolic process; GO:0005996 monosaccharide metabolic process; GO:0006006 glucose metabolic process; GO:0006066 alcohol metabolic process; GO:0006071 glycerol metabolic process; GO:0006082 organic acid metabolic process; GO:0006090 pyruvate metabolic …	GO:0005622 intracellular; GO:0005623 cell; GO:0005737 cytoplasm; GO:0005829 cytosol;	GO:0000166 nucleotide binding; GO:0000287 magnesium ion binding; GO:0001882 nucleoside binding; GO:0001883 purine nucleoside binding; GO:0003824 catalytic activity; GO:0004550 nucleoside diphosphate kinase activity; GO:0004611 phosphoenolpyruvate carboxykinase activity; GO:0004613 phosphoenolpyruvate carboxykinase (GTP) activity; GO:0005488 binding; GO:0005525 GTP binding; GO:0016301 kinase activ…	PF00821	Phosphoenolpyruvate carboxykinase	C	KOG3749	Phosphoenolpyruvate carboxykinase
O70400	PDZ and LIM domain protein 1 OS=Mus musculus OX=10090 GN=Pdlim1 PE=1 SV=4	Pdlim1	2.4387	2.78377e-06	Up	35.774	68.2	15	15	0.520813	0.628696	0.544055	0.880373	0.908139	0.846718	0.922682	0.865171	1.31762	1.30212	1.45564	1.46143	1.34654	cytoplasm,nucleus	K23353			GO:0001666 response to hypoxia; GO:0006355 regulation of transcription, DNA-templated; GO:0006950 response to stress; GO:0009628 response to abiotic stimulus; GO:0009889 regulation of biosynthetic process; GO:0009891 positive regulation of biosynthetic process; GO:0009893 positive regulation of metabolic process; GO:0010468 regulation of gene expression; GO:0010556 regulation of macromolecule bio…	GO:0005622 intracellular; GO:0005623 cell; GO:0005667 transcription regulator complex; GO:0032991 protein-containing complex;	GO:0003712 transcription coregulator activity; GO:0003713 transcription coactivator activity; GO:0140110 transcription regulator activity;	PF00595; PF00412	PDZ domain (Also known as DHR or GLGF); LIM domain	TZ	KOG1703	Adaptor protein Enigma and related PDZ-LIM proteins
P03953	Complement factor D OS=Mus musculus OX=10090 GN=Cfd PE=1 SV=1	Cfd	2.424	6.74148e-07	Up	28.057	45.2	7	7	0.63495	0.672283	0.680934	0.600521	0.529026	0.611602	0.631691	0.606802	1.66391	1.76186	1.51197	1.53443	1.56003	extracellular	K01334	CFD; complement factor D [EC:3.4.21.46]	mmu05171 Coronavirus disease - COVID-19; mmu05150 Staphylococcus aureus infection; mmu04610 Complement and coagulation cascades	GO:0001775 cell activation; GO:0002252 immune effector process; GO:0002253 activation of immune response; GO:0002263 cell activation involved in immune response; GO:0002274 myeloid leukocyte activation; GO:0002275 myeloid cell activation involved in immune response; GO:0002283 neutrophil activation involved in immune response; GO:0002366 leukocyte activation involved in immune response; GO:000237…	GO:0000323 lytic vacuole; GO:0005576 extracellular region; GO:0005615 extracellular space; GO:0005622 intracellular; GO:0005623 cell; GO:0005737 cytoplasm; GO:0005764 lysosome; GO:0005766 primary lysosome; GO:0005773 vacuole; GO:0005775 vacuolar lumen; GO:0005829 cytosol; GO:0005886 plasma membrane; GO:0012505 endomembrane system; GO:0016020 membrane; GO:0030141 secretory granule; GO:0031091 plat…	GO:0003824 catalytic activity; GO:0004175 endopeptidase activity; GO:0004252 serine-type endopeptidase activity; GO:0005102 signaling receptor binding; GO:0005488 binding; GO:0005515 protein binding; GO:0008233 peptidase activity; GO:0008236 serine-type peptidase activity; GO:0016787 hydrolase activity; GO:0017171 serine hydrolase activity; GO:0019899 enzyme binding; GO:0070011 peptidase activity…	PF00089	Trypsin	O	KOG3627	Trypsin
P18242	Cathepsin D OS=Mus musculus OX=10090 GN=Ctsd PE=1 SV=1	Ctsd	2.4169	1.79201e-10	Up	44.953	45.6	13	13	0.581364	0.589408	0.59712	0.807863	0.825086	0.83365	0.814866	0.829392	1.41728	1.43148	1.45514	1.4188	1.39855	extracellular	K01379	CTSD; cathepsin D [EC:3.4.23.5]	mmu04210 Apoptosis; mmu04142 Lysosome; mmu04140 Autophagy - animal; mmu04071 Sphingolipid signaling pathway; mmu04915 Estrogen signaling pathway; mmu05152 Tuberculosis	GO:0000045 autophagosome assembly; GO:0006508 proteolysis; GO:0006807 nitrogen compound metabolic process; GO:0006914 autophagy; GO:0006996 organelle organization; GO:0007033 vacuole organization; GO:0008152 metabolic process; GO:0009056 catabolic process; GO:0009057 macromolecule catabolic process; GO:0009605 response to external stimulus; GO:0009987 cellular process; GO:0009991 response to extr…	GO:0000323 lytic vacuole; GO:0005576 extracellular region; GO:0005615 extracellular space; GO:0005622 intracellular; GO:0005623 cell; GO:0005737 cytoplasm; GO:0005764 lysosome; GO:0005773 vacuole; GO:0016020 membrane; GO:0043226 organelle; GO:0043227 membrane-bounded organelle; GO:0043229 intracellular organelle; GO:0043231 intracellular membrane-bounded organelle; GO:0045121 membrane raft; GO:00…	GO:0003824 catalytic activity; GO:0004175 endopeptidase activity; GO:0004190 aspartic-type endopeptidase activity; GO:0005488 binding; GO:0008233 peptidase activity; GO:0016787 hydrolase activity; GO:0033218 amide binding; GO:0042277 peptide binding; GO:0070001 aspartic-type peptidase activity; GO:0070011 peptidase activity, acting on L-amino acid peptides; GO:0140096 catalytic activity, acting o…			O	KOG1339	Aspartyl protease
P28667	MARCKS-related protein OS=Mus musculus OX=10090 GN=Marcksl1 PE=1 SV=2	Marcksl1	2.4168	0.00299522	Up	20.165	14	2	2	0.506528		0.721482	0.674423	0.796104	0.73823	0.703238	0.924187	1.60969	1.47289	1.59804	1.25518		nucleus	K13536	MARCKSL1; MARCKS-related protein	mmu05140 Leishmaniasis; mmu04666 Fc gamma R-mediated phagocytosis	GO:0008284 positive regulation of cell population proliferation; GO:0042127 regulation of cell population proliferation; GO:0048518 positive regulation of biological process; GO:0048522 positive regulation of cellular process; GO:0050789 regulation of biological process; GO:0050794 regulation of cellular process; GO:0065007 biological regulation;	GO:0005623 cell; GO:0005886 plasma membrane; GO:0016020 membrane; GO:0071944 cell periphery;
Q99N11	Dual specificity protein phosphatase 22 OS=Mus musculus OX=10090 GN=Dusp22 PE=1 SV=1	Dusp22	2.4158	0.00174684	Up	20.997	15.2	2	2		0.666867	0.444041	0.904217	0.702309	0.725428	0.847816		1.16995	1.18154	1.30445	1.59631	1.45707	mitochondria	K14165			GO:0000122 negative regulation of transcription by RNA polymerase II; GO:0000188 inactivation of MAPK activity; GO:0001932 regulation of protein phosphorylation; GO:0001933 negative regulation of protein phosphorylation; GO:0001934 positive regulation of protein phosphorylation; GO:0002682 regulation of immune system process; GO:0002683 negative regulation of immune system process; GO:0002694 reg…		GO:0003824 catalytic activity; GO:0004721 phosphoprotein phosphatase activity; GO:0004725 protein tyrosine phosphatase activity; GO:0008138 protein tyrosine/serine/threonine phosphatase activity; GO:0016787 hydrolase activity; GO:0016788 hydrolase activity, acting on ester bonds; GO:0016791 phosphatase activity; GO:0042578 phosphoric ester hydrolase activity; GO:0140096 catalytic activity, acting…	PF00782	Dual specificity phosphatase, catalytic domain	V	KOG1716	Dual specificity phosphatase
Q61140	Breast cancer anti-estrogen resistance protein 1 OS=Mus musculus OX=10090 GN=Bcar1 PE=1 SV=2	Bcar1	2.4125	5.40805e-07	Up	94.284	28.3	14	13	0.563656	0.640996	0.660771	0.752857	0.738726	0.776898	0.747489	0.618081	1.45795	1.49116	1.47474	1.57448	1.50219	nucleus	K05726	BCAR1; breast cancer anti-estrogen resistance 1	mmu04015 Rap1 signaling pathway; mmu04062 Chemokine signaling pathway; mmu04810 Regulation of actin cytoskeleton; mmu04510 Focal adhesion; mmu05135 Yersinia infection; mmu04670 Leukocyte transendothelial migration; mmu04935 Growth hormone synthesis, secretion and action; mmu05100 Bacterial invasion of epithelial cells; mmu05163 Human cytomegalovirus infection	GO:0000302 response to reactive oxygen species; GO:0001558 regulation of cell growth; GO:0002253 activation of immune response; GO:0002376 immune system process; GO:0002429 immune response-activating cell surface receptor signaling pathway; GO:0002682 regulation of immune system process; GO:0002684 positive regulation of immune system process; GO:0002757 immune response-activating signal transduc…	GO:0001726 ruffle; GO:0005622 intracellular; GO:0005623 cell; GO:0005737 cytoplasm; GO:0005829 cytosol; GO:0005856 cytoskeleton; GO:0005886 plasma membrane; GO:0005912 adherens junction; GO:0005925 focal adhesion; GO:0015629 actin cytoskeleton; GO:0016020 membrane; GO:0030027 lamellipodium; GO:0030054 cell junction; GO:0030055 cell-substrate junction; GO:0031252 cell leading edge; GO:0042995 cell…	GO:0005488 binding; GO:0005515 protein binding; GO:0019899 enzyme binding; GO:0019900 kinase binding; GO:0019901 protein kinase binding; GO:0019904 protein domain specific binding;	PF00018; PF08824; PF12026	SH3 domain; Serine rich protein interaction domain; Domain of unknown function (DUF3513)
P21956	Lactadherin OS=Mus musculus OX=10090 GN=Mfge8 PE=1 SV=3	Mfge8	2.4091	3.33654e-08	Up	51.24	34.3	12	12	0.43801	0.403728	0.428711	1.31135	1.33585	1.33251	1.30614	1.34274	1.02718	1.00966	0.987032	1.01025	1.06683	extracellular	K17253			GO:0006464 cellular protein modification process; GO:0006807 nitrogen compound metabolic process; GO:0006810 transport; GO:0006897 endocytosis; GO:0006909 phagocytosis; GO:0006910 phagocytosis, recognition; GO:0006911 phagocytosis, engulfment; GO:0008037 cell recognition; GO:0008152 metabolic process; GO:0008284 positive regulation of cell population proliferation; GO:0009987 cellular process; GO…	GO:0005576 extracellular region; GO:0005615 extracellular space; GO:0005622 intracellular; GO:0005623 cell; GO:0005737 cytoplasm; GO:0005783 endoplasmic reticulum; GO:0005788 endoplasmic reticulum lumen; GO:0005886 plasma membrane; GO:0009897 external side of plasma membrane; GO:0009986 cell surface; GO:0012505 endomembrane system; GO:0016020 membrane; GO:0019897 extrinsic component of plasma mem…	GO:0001786 phosphatidylserine binding; GO:0005102 signaling receptor binding; GO:0005178 integrin binding; GO:0005488 binding; GO:0005515 protein binding; GO:0005543 phospholipid binding; GO:0008289 lipid binding; GO:0008429 phosphatidylethanolamine binding; GO:0043167 ion binding; GO:0043168 anion binding; GO:0044877 protein-containing complex binding; GO:0050839 cell adhesion molecule binding; …	PF00008; PF00754	EGF-like domain; F5/8 type C domain
Q60989	E3 ubiquitin-protein ligase XIAP OS=Mus musculus OX=10090 GN=Xiap PE=1 SV=2	Xiap	2.3956	0.0283862	Up	56.078	8.1	3	3	0.397214	0.508408	0.831464	0.835548	0.736592			0.755117	1.88509	1.27787	1.98853	1.06832	0.715849	cytoplasm	K04725	XIAP; E3 ubiquitin-protein ligase XIAP [EC:2.3.2.27]	mmu04064 NF-kappa B signaling pathway; mmu04621 NOD-like receptor signaling pathway; mmu05166 Human T-cell leukemia virus 1 infection; mmu04510 Focal adhesion; mmu05145 Toxoplasmosis; mmu04210 Apoptosis; mmu04215 Apoptosis - multiple species; mmu04217 Necroptosis; mmu01524 Platinum drug resistance; mmu05222 Small cell lung cancer; mmu04120 Ubiquitin mediated proteolysis; mmu05200 Pathways in canc…	GO:0002682 regulation of immune system process; GO:0006355 regulation of transcription, DNA-templated; GO:0006357 regulation of transcription by RNA polymerase II; GO:0006464 cellular protein modification process; GO:0006807 nitrogen compound metabolic process; GO:0006915 apoptotic process; GO:0006950 response to stress; GO:0006974 cellular response to DNA damage stimulus; GO:0008152 metabolic pr…	GO:0005622 intracellular; GO:0005623 cell; GO:0005634 nucleus; GO:0005654 nucleoplasm; GO:0005737 cytoplasm; GO:0005829 cytosol; GO:0031974 membrane-enclosed lumen; GO:0031981 nuclear lumen; GO:0032991 protein-containing complex; GO:0043226 organelle; GO:0043227 membrane-bounded organelle; GO:0043229 intracellular organelle; GO:0043231 intracellular membrane-bounded organelle; GO:0043233 organell…	GO:0002020 protease binding; GO:0003824 catalytic activity; GO:0004842 ubiquitin-protein transferase activity; GO:0004857 enzyme inhibitor activity; GO:0004866 endopeptidase inhibitor activity; GO:0004869 cysteine-type endopeptidase inhibitor activity; GO:0005488 binding; GO:0005515 protein binding; GO:0016740 transferase activity; GO:0019787 ubiquitin-like protein transferase activity; GO:001989…	PF00653; PF13920	Inhibitor of Apoptosis domain; Zinc finger, C3HC4 type (RING finger)	O	KOG1101	Apoptosis inhibitor IAP1 and related BIR domain proteins
Q8BGT6	MICAL-like protein 1 OS=Mus musculus OX=10090 GN=Micall1 PE=1 SV=3	Micall1	2.3824	0.00283309	Up	94.078	5.4	3	3		0.540593	0.551819		0.637321			0.763991	1.53053	1.62522	1.26738	1.0426	1.04055	nucleus	K19948			GO:0006605 protein targeting; GO:0006612 protein targeting to membrane; GO:0006810 transport; GO:0006886 intracellular protein transport; GO:0006897 endocytosis; GO:0006898 receptor-mediated endocytosis; GO:0007009 plasma membrane organization; GO:0007275 multicellular organism development; GO:0007399 nervous system development; GO:0008104 protein localization; GO:0009719 response to endogenous s…	GO:0005622 intracellular; GO:0005623 cell; GO:0005737 cytoplasm; GO:0005768 endosome; GO:0005770 late endosome; GO:0010008 endosome membrane; GO:0012505 endomembrane system; GO:0016020 membrane; GO:0019898 extrinsic component of membrane; GO:0031090 organelle membrane; GO:0031410 cytoplasmic vesicle; GO:0031982 vesicle; GO:0043226 organelle; GO:0043227 membrane-bounded organelle; GO:0043229 intra…	GO:0005488 binding; GO:0005515 protein binding; GO:0005543 phospholipid binding; GO:0008289 lipid binding; GO:0017016 Ras GTPase binding; GO:0017137 Rab GTPase binding; GO:0019899 enzyme binding; GO:0031267 small GTPase binding; GO:0042802 identical protein binding; GO:0043167 ion binding; GO:0043168 anion binding; GO:0051020 GTPase binding; GO:0070300 phosphatidic acid binding;	PF00307; PF00412; PF12130	Calponin homology (CH) domain; LIM domain; Protein of unknown function (DUF3585)
P09528	Ferritin heavy chain OS=Mus musculus OX=10090 GN=Fth1 PE=1 SV=2	Fth1	2.3788	1.1108e-08	Up	21.066	71.4	12	12	0.633214	0.611445	0.628665	0.745686	0.744365	0.754133	0.722857	0.732541	1.53964	1.51917	1.44958	1.42791	1.4908	cytoplasm	K00522	FTH1; ferritin heavy chain [EC:1.16.3.2]	mmu04216 Ferroptosis; mmu04217 Necroptosis; mmu04978 Mineral absorption	GO:0000041 transition metal ion transport; GO:0002376 immune system process; GO:0006810 transport; GO:0006811 ion transport; GO:0006812 cation transport; GO:0006826 iron ion transport; GO:0006873 cellular ion homeostasis; GO:0006875 cellular metal ion homeostasis; GO:0006879 cellular iron ion homeostasis; GO:0006880 intracellular sequestering of iron ion; GO:0006955 immune response; GO:0008285 ne…	GO:0000323 lytic vacuole; GO:0005576 extracellular region; GO:0005622 intracellular; GO:0005623 cell; GO:0005737 cytoplasm; GO:0005764 lysosome; GO:0005767 secondary lysosome; GO:0005773 vacuole; GO:0005776 autophagosome; GO:0030139 endocytic vesicle; GO:0031410 cytoplasmic vesicle; GO:0031974 membrane-enclosed lumen; GO:0031982 vesicle; GO:0031983 vesicle lumen; GO:0043226 organelle; GO:0043227 …	GO:0005488 binding; GO:0005506 iron ion binding; GO:0043167 ion binding; GO:0043169 cation binding; GO:0046872 metal ion binding; GO:0046914 transition metal ion binding;	PF00210	Ferritin-like domain	P	KOG2332	Ferritin
Q07797	Galectin-3-binding protein OS=Mus musculus OX=10090 GN=Lgals3bp PE=1 SV=1	Lgals3bp	2.3746	1.5279e-10	Up	64.49	30.8	11	11	0.583764	0.588793	0.56576	0.876454	0.885748	0.862985	0.882471	0.87421	1.38901	1.3843	1.37343	1.36683	1.36625	extracellular	K17300			GO:0002576 platelet degranulation; GO:0006810 transport; GO:0006887 exocytosis; GO:0006897 endocytosis; GO:0006898 receptor-mediated endocytosis; GO:0006950 response to stress; GO:0006952 defense response; GO:0006968 cellular defense response; GO:0007154 cell communication; GO:0007165 signal transduction; GO:0009987 cellular process; GO:0016192 vesicle-mediated transport; GO:0023052 signaling; GO…	GO:0005576 extracellular region; GO:0005615 extracellular space; GO:0005622 intracellular; GO:0005623 cell; GO:0005737 cytoplasm; GO:0012505 endomembrane system; GO:0030141 secretory granule; GO:0031089 platelet dense granule lumen; GO:0031410 cytoplasmic vesicle; GO:0031974 membrane-enclosed lumen; GO:0031982 vesicle; GO:0031983 vesicle lumen; GO:0034774 secretory granule lumen; GO:0042827 plate…	GO:0005044 scavenger receptor activity; GO:0038024 cargo receptor activity;	PF00530; PF07707	Scavenger receptor cysteine-rich domain; BTB And C-terminal Kelch
Q5NBX1	Protein cordon-bleu OS=Mus musculus OX=10090 GN=Cobl PE=1 SV=1	Cobl	2.3627	4.76916e-06	Up	143.86	15	14	14	0.738208	0.637603	0.634639	0.6036	0.661031	0.618043	0.632892	0.557025	1.79046	1.56102	1.5345	1.53325	1.49772	nucleus	K18623			GO:0000578 embryonic axis specification; GO:0000902 cell morphogenesis; GO:0000904 cell morphogenesis involved in differentiation; GO:0001756 somitogenesis; GO:0001757 somite specification; GO:0001838 embryonic epithelial tube formation; GO:0001841 neural tube formation; GO:0001843 neural tube closure; GO:0001889 liver development; GO:0002009 morphogenesis of an epithelium; GO:0003002 regionaliza…	GO:0001726 ruffle; GO:0005622 intracellular; GO:0005623 cell; GO:0005737 cytoplasm; GO:0005829 cytosol; GO:0005856 cytoskeleton; GO:0005886 plasma membrane; GO:0005938 cell cortex; GO:0016020 membrane; GO:0030424 axon; GO:0030425 dendrite; GO:0030426 growth cone; GO:0030427 site of polarized growth; GO:0031252 cell leading edge; GO:0036477 somatodendritic compartment; GO:0042995 cell projection; …	GO:0003779 actin binding; GO:0003785 actin monomer binding; GO:0005488 binding; GO:0005515 protein binding; GO:0008092 cytoskeletal protein binding;	PF09469	Cordon-bleu domain
O89086	RNA-binding protein 3 OS=Mus musculus OX=10090 GN=Rbm3 PE=1 SV=1	Rbm3	2.3581	5.17422e-10	Up	16.604	55.6	6	6	0.700167	0.691723	0.686825	0.556756	0.550592	0.570295	0.537165	0.536828	1.65408	1.64328	1.64212	1.57977	1.6504	nucleus	K13186			GO:0006139 nucleobase-containing compound metabolic process; GO:0006396 RNA processing; GO:0006412 translation; GO:0006417 regulation of translation; GO:0006518 peptide metabolic process; GO:0006725 cellular aromatic compound metabolic process; GO:0006807 nitrogen compound metabolic process; GO:0006950 response to stress; GO:0008152 metabolic process; GO:0009058 biosynthetic process; GO:0009059 m…	GO:0005622 intracellular; GO:0005623 cell; GO:0005634 nucleus; GO:0005654 nucleoplasm; GO:0005730 nucleolus; GO:0005737 cytoplasm; GO:0030425 dendrite; GO:0031974 membrane-enclosed lumen; GO:0031981 nuclear lumen; GO:0036477 somatodendritic compartment; GO:0042995 cell projection; GO:0043005 neuron projection; GO:0043226 organelle; GO:0043227 membrane-bounded organelle; GO:0043228 non-membrane-bo…	GO:0005488 binding; GO:0043021 ribonucleoprotein complex binding; GO:0043023 ribosomal large subunit binding; GO:0044877 protein-containing complex binding;	PF00076	RNA recognition motif. (a.k.a. RRM, RBD, or RNP domain)	A	KOG0118	FOG: RRM domain
Q9ESB3	Histidine-rich glycoprotein OS=Mus musculus OX=10090 GN=Hrg PE=1 SV=2	Hrg	2.3459	2.3884e-09	Up	59.162	28.8	12	12	0.712888	0.702297	0.724532	0.513332	0.481644	0.483836	0.528106	0.487604	1.66425	1.63427	1.66662	1.74028	1.66035	extracellular	K23410			GO:0001558 regulation of cell growth; GO:0001775 cell activation; GO:0001906 cell killing; GO:0001932 regulation of protein phosphorylation; GO:0001952 regulation of cell-matrix adhesion; GO:0001954 positive regulation of cell-matrix adhesion; GO:0002376 immune system process; GO:0002576 platelet degranulation; GO:0002682 regulation of immune system process; GO:0002684 positive regulation of immu…	GO:0000323 lytic vacuole; GO:0005576 extracellular region; GO:0005615 extracellular space; GO:0005622 intracellular; GO:0005623 cell; GO:0005737 cytoplasm; GO:0005764 lysosome; GO:0005765 lysosomal membrane; GO:0005767 secondary lysosome; GO:0005768 endosome; GO:0005773 vacuole; GO:0005774 vacuolar membrane; GO:0005886 plasma membrane; GO:0009986 cell surface; GO:0012505 endomembrane system; GO:0…	GO:0004857 enzyme inhibitor activity; GO:0004866 endopeptidase inhibitor activity; GO:0004867 serine-type endopeptidase inhibitor activity; GO:0005102 signaling receptor binding; GO:0005488 binding; GO:0005515 protein binding; GO:0005539 glycosaminoglycan binding; GO:0008201 heparin binding; GO:0008270 zinc ion binding; GO:0019865 immunoglobulin binding; GO:0020037 heme binding; GO:0030234 enzyme…
P17439	Lysosomal acid glucosylceramidase OS=Mus musculus OX=10090 GN=Gba PE=1 SV=1	Gba	2.3341	1.64496e-06	Up	57.621	21.6	8	8	0.568561	0.565472	0.613462	0.86414	0.879902	0.938497	0.828701	0.943338	1.32261	1.35059	1.44331	1.45498	1.22644	extracellular	K01201	GBA; glucosylceramidase [EC:3.2.1.45]	mmu00511 Other glycan degradation; mmu04142 Lysosome; mmu01100 Metabolic pathways; mmu00600 Sphingolipid metabolism	GO:0001817 regulation of cytokine production; GO:0001818 negative regulation of cytokine production; GO:0001932 regulation of protein phosphorylation; GO:0001933 negative regulation of protein phosphorylation; GO:0006066 alcohol metabolic process; GO:0006469 negative regulation of protein kinase activity; GO:0006629 lipid metabolic process; GO:0006643 membrane lipid metabolic process; GO:0006664 …	GO:0000323 lytic vacuole; GO:0005576 extracellular region; GO:0005615 extracellular space; GO:0005622 intracellular; GO:0005623 cell; GO:0005737 cytoplasm; GO:0005764 lysosome; GO:0005765 lysosomal membrane; GO:0005773 vacuole; GO:0005774 vacuolar membrane; GO:0005775 vacuolar lumen; GO:0016020 membrane; GO:0019898 extrinsic component of membrane; GO:0031090 organelle membrane; GO:0031974 membran…	GO:0003824 catalytic activity; GO:0004348 glucosylceramidase activity; GO:0004553 hydrolase activity, hydrolyzing O-glycosyl compounds; GO:0005102 signaling receptor binding; GO:0005124 scavenger receptor binding; GO:0005488 binding; GO:0005515 protein binding; GO:0016787 hydrolase activity; GO:0016798 hydrolase activity, acting on glycosyl bonds;	PF02055	O-Glycosyl hydrolase family 30	G	KOG2566	Beta-glucocerebrosidase
P42227	Signal transducer and activator of transcription 3 OS=Mus musculus OX=10090 GN=Stat3 PE=1 SV=2	Stat3	2.3322	2.02371e-08	Up	88.053	47.7	25	25	0.630323	0.577107	0.59021	0.838827	0.851669	0.856903	0.838219	0.829212	1.37299	1.42813	1.41596	1.37488	1.39557	cytoplasm,nucleus	K04692	STAT3; signal transducer and activator of transcription 3	mmu04630 JAK-STAT signaling pathway; mmu04920 Adipocytokine signaling pathway; mmu05161 Hepatitis B; mmu05145 Toxoplasmosis; mmu05167 Kaposi sarcoma-associated herpesvirus infection; mmu05169 Epstein-Barr virus infection; mmu04659 Th17 cell differentiation; mmu05160 Hepatitis C; mmu05205 Proteoglycans in cancer; mmu01521 EGFR tyrosine kinase inhibitor resistance; mmu05162 Measles; mmu05163 Human …	GO:0000003 reproduction; GO:0000122 negative regulation of transcription by RNA polymerase II; GO:0001654 eye development; GO:0001659 temperature homeostasis; GO:0001754 eye photoreceptor cell differentiation; GO:0001775 cell activation; GO:0001932 regulation of protein phosphorylation; GO:0001934 positive regulation of protein phosphorylation; GO:0001936 regulation of endothelial cell proliferat…	GO:0000228 nuclear chromosome; GO:0000785 chromatin; GO:0000790 nuclear chromatin; GO:0005622 intracellular; GO:0005623 cell; GO:0005634 nucleus; GO:0005654 nucleoplasm; GO:0005667 transcription regulator complex; GO:0005694 chromosome; GO:0005737 cytoplasm; GO:0005739 mitochondrion; GO:0005740 mitochondrial envelope; GO:0005743 mitochondrial inner membrane; GO:0005829 cytosol; GO:0005886 plasma …	GO:0000976 transcription regulatory region sequence-specific DNA binding; GO:0000977 RNA polymerase II transcription regulatory region sequence-specific DNA binding; GO:0000978 RNA polymerase II cis-regulatory region sequence-specific DNA binding; GO:0000981 DNA-binding transcription factor activity, RNA polymerase II-specific; GO:0000987 cis-regulatory region sequence-specific DNA binding; GO:00…	PF02865; PF02864; PF00017	STAT protein, protein interaction domain; STAT protein, DNA binding domain; SH2 domain	K	KOG3667	STAT protein
Q6PDH0	Pleckstrin homology-like domain family B member 1 OS=Mus musculus OX=10090 GN=Phldb1 PE=1 SV=1	Phldb1	2.3183	4.07837e-05	Up	150.07	8.2	7	7	0.593493	0.633283	0.570195	0.838211	0.920061	0.891701	0.976037	0.633807	1.43781	1.65762	1.38786	1.26692	1.19301	nucleus	K23794			GO:0010470 regulation of gastrulation; GO:0010717 regulation of epithelial to mesenchymal transition; GO:0022603 regulation of anatomical structure morphogenesis; GO:0032886 regulation of microtubule-based process; GO:0033043 regulation of organelle organization; GO:0040019 positive regulation of embryonic development; GO:0044087 regulation of cellular component biogenesis; GO:0044089 positive re…	GO:0005622 intracellular; GO:0005623 cell; GO:0005737 cytoplasm; GO:0005938 cell cortex; GO:0045178 basal part of cell; GO:0045180 basal cortex; GO:0071944 cell periphery; GO:0099568 cytoplasmic region; GO:0099738 cell cortex region;		PF00169	PH domain
Q8BGT5	Alanine aminotransferase 2 OS=Mus musculus OX=10090 GN=Gpt2 PE=1 SV=1	Gpt2	2.3162	2.41693e-08	Up	57.943	41.6	14	13	0.701394	0.68418	0.71685	0.55869	0.576357	0.583789	0.554098	0.508724	1.57983	1.65252	1.68582	1.64404	1.5537	mitochondria	K00814	GPT; alanine transaminase [EC:2.6.1.2]	mmu01230 Biosynthesis of amino acids; mmu01200 Carbon metabolism; mmu01210 2-Oxocarboxylic acid metabolism; mmu00250 Alanine, aspartate and glutamate metabolism; mmu01100 Metabolic pathways; mmu00220 Arginine biosynthesis	GO:0006082 organic acid metabolic process; GO:0006103 2-oxoglutarate metabolic process; GO:0006520 cellular amino acid metabolic process; GO:0006522 alanine metabolic process; GO:0006807 nitrogen compound metabolic process; GO:0008152 metabolic process; GO:0009078 pyruvate family amino acid metabolic process; GO:0009987 cellular process; GO:0019752 carboxylic acid metabolic process; GO:0042851 L-…		GO:0003824 catalytic activity; GO:0004021 L-alanine:2-oxoglutarate aminotransferase activity; GO:0008483 transaminase activity; GO:0016740 transferase activity; GO:0016769 transferase activity, transferring nitrogenous groups; GO:0047635 alanine-oxo-acid transaminase activity;	PF00155	Aminotransferase class I and II	E	KOG0258	Alanine aminotransferase
Q8R2Y2	Cell surface glycoprotein MUC18 OS=Mus musculus OX=10090 GN=Mcam PE=1 SV=1	Mcam	2.3145	5.32594e-06	Up	71.545	22.4	10	10	0.635536	0.664686	0.651145	0.729709	0.721048	0.679773	0.725909	0.664909	1.39743	1.46711	1.36778	1.70044	1.59453	extracellular	K06534			GO:0001525 angiogenesis; GO:0001568 blood vessel development; GO:0001944 vasculature development; GO:0003008 system process; GO:0003014 renal system process; GO:0003094 glomerular filtration; GO:0006950 response to stress; GO:0007155 cell adhesion; GO:0007157 heterophilic cell-cell adhesion via plasma membrane cell adhesion molecules; GO:0007275 multicellular organism development; GO:0009611 resp…	GO:0005576 extracellular region; GO:0005615 extracellular space; GO:0005622 intracellular; GO:0005623 cell; GO:0005634 nucleus; GO:0005886 plasma membrane; GO:0009897 external side of plasma membrane; GO:0009986 cell surface; GO:0016020 membrane; GO:0043226 organelle; GO:0043227 membrane-bounded organelle; GO:0043229 intracellular organelle; GO:0043231 intracellular membrane-bounded organelle; GO…		PF07686; PF08205; PF13927; PF07679	Immunoglobulin V-set domain; CD80-like C2-set immunoglobulin domain ; Immunoglobulin domain; Immunoglobulin I-set domain
Q9ERL9	Guanylate cyclase soluble subunit alpha-1 OS=Mus musculus OX=10090 GN=Gucy1a1 PE=1 SV=2	Gucy1a1	2.3107	6.87247e-06	Up	77.587	23	12	12	0.503876	0.43297	0.547018	1.14289	1.1959	1.21779	1.09562	1.14929	1.1968	1.0598	1.16037	1.11368	1.184	cytoplasm	K12318	GUCY1A; guanylate cyclase soluble subunit alpha [EC:4.6.1.2]	mmu04270 Vascular smooth muscle contraction; mmu01100 Metabolic pathways; mmu04713 Circadian entrainment; mmu00230 Purine metabolism; mmu04921 Oxytocin signaling pathway; mmu04540 Gap junction; mmu04924 Renin secretion; mmu04730 Long-term depression; mmu04022 cGMP-PKG signaling pathway; mmu04970 Salivary secretion; mmu04611 Platelet activation	GO:0003008 system process; GO:0003012 muscle system process; GO:0003013 circulatory system process; GO:0003018 vascular process in circulatory system; GO:0006139 nucleobase-containing compound metabolic process; GO:0006163 purine nucleotide metabolic process; GO:0006164 purine nucleotide biosynthetic process; GO:0006182 cGMP biosynthetic process; GO:0006725 cellular aromatic compound metabolic pr…	GO:0005622 intracellular; GO:0005623 cell; GO:0005737 cytoplasm; GO:0005829 cytosol; GO:0005886 plasma membrane; GO:0008074 guanylate cyclase complex, soluble; GO:0016020 membrane; GO:0032991 protein-containing complex; GO:0071944 cell periphery;	GO:0000166 nucleotide binding; GO:0001882 nucleoside binding; GO:0001883 purine nucleoside binding; GO:0003824 catalytic activity; GO:0004383 guanylate cyclase activity; GO:0005488 binding; GO:0005515 protein binding; GO:0005525 GTP binding; GO:0009975 cyclase activity; GO:0016829 lyase activity; GO:0016849 phosphorus-oxygen lyase activity; GO:0017076 purine nucleotide binding; GO:0019001 guanyl …	PF07701; PF00211	Heme NO binding associated; Adenylate and Guanylate cyclase catalytic domain	F	KOG4171	Adenylate/guanylate kinase
Q61112	45 kDa calcium-binding protein OS=Mus musculus OX=10090 GN=Sdf4 PE=1 SV=1	Sdf4	2.297	0.000134648	Up	42.064	21.1	6	6	0.822586	0.625494	0.578043	0.584363	0.73254	0.655011	0.576237	0.669178	1.46558	1.42921	1.43525	1.77834	1.64816	extracellular	K19934			GO:0006810 transport; GO:0006887 exocytosis; GO:0007275 multicellular organism development; GO:0007399 nervous system development; GO:0007417 central nervous system development; GO:0007420 brain development; GO:0009314 response to radiation; GO:0009411 response to UV; GO:0009416 response to light stimulus; GO:0009628 response to abiotic stimulus; GO:0009636 response to toxic substance; GO:0009650…	GO:0005622 intracellular; GO:0005623 cell; GO:0005737 cytoplasm; GO:0005768 endosome; GO:0005770 late endosome; GO:0005794 Golgi apparatus; GO:0005796 Golgi lumen; GO:0012505 endomembrane system; GO:0031410 cytoplasmic vesicle; GO:0031974 membrane-enclosed lumen; GO:0031982 vesicle; GO:0032059 bleb; GO:0042995 cell projection; GO:0043226 organelle; GO:0043227 membrane-bounded organelle; GO:004322…	GO:0005488 binding; GO:0005509 calcium ion binding; GO:0005515 protein binding; GO:0042802 identical protein binding; GO:0043167 ion binding; GO:0043169 cation binding; GO:0046872 metal ion binding;	PF13499; PF13202	EF-hand domain pair; EF hand	T	KOG4251	Calcium binding protein
P39749	Flap endonuclease 1 OS=Mus musculus OX=10090 GN=Fen1 PE=1 SV=1	Fen1	2.2928	2.04095e-06	Up	42.314	30.2	8	8	0.601707	0.573241	0.660281	0.91715	0.841432	0.840754	0.718391	0.834146	1.47996	1.33617	1.29506	1.47043	1.43128	nucleus	K04799	FEN1; flap endonuclease-1 [EC:3.-.-.-]	mmu03030 DNA replication; mmu03450 Non-homologous end-joining; mmu03410 Base excision repair	GO:0000723 telomere maintenance; GO:0000724 double-strand break repair via homologous recombination; GO:0000725 recombinational repair; GO:0003008 system process; GO:0006139 nucleobase-containing compound metabolic process; GO:0006259 DNA metabolic process; GO:0006260 DNA replication; GO:0006261 DNA-dependent DNA replication; GO:0006271 DNA strand elongation involved in DNA replication; GO:000627…	GO:0005622 intracellular; GO:0005623 cell; GO:0005634 nucleus; GO:0005654 nucleoplasm; GO:0005730 nucleolus; GO:0005737 cytoplasm; GO:0005739 mitochondrion; GO:0031974 membrane-enclosed lumen; GO:0031981 nuclear lumen; GO:0032991 protein-containing complex; GO:0043226 organelle; GO:0043227 membrane-bounded organelle; GO:0043228 non-membrane-bounded organelle; GO:0043229 intracellular organelle; G…	GO:0000287 magnesium ion binding; GO:0003676 nucleic acid binding; GO:0003677 DNA binding; GO:0003684 damaged DNA binding; GO:0003690 double-stranded DNA binding; GO:0003824 catalytic activity; GO:0004518 nuclease activity; GO:0004519 endonuclease activity; GO:0004520 endodeoxyribonuclease activity; GO:0004521 endoribonuclease activity; GO:0004523 RNA-DNA hybrid ribonuclease activity; GO:0004527 …			L	KOG2519	5'-3' exonuclease
P52432	DNA-directed RNA polymerases I and III subunit RPAC1 OS=Mus musculus OX=10090 GN=Polr1c PE=1 SV=3	Polr1c	2.2909	6.40801e-08	Up	39.106	20.2	5	5	0.689789	0.631071	0.639289	0.657594	0.669099	0.766425	0.779348	0.68315	1.53991	1.44474	1.52044	1.4623	1.51683	cytoplasm	K03027	RPC40; DNA-directed RNA polymerases I and III subunit RPAC1	mmu03020 RNA polymerase; mmu04623 Cytosolic DNA-sensing pathway	GO:0006139 nucleobase-containing compound metabolic process; GO:0006351 transcription, DNA-templated; GO:0006352 DNA-templated transcription, initiation; GO:0006353 DNA-templated transcription, termination; GO:0006360 transcription by RNA polymerase I; GO:0006361 transcription initiation from RNA polymerase I promoter; GO:0006363 termination of RNA polymerase I transcription; GO:0006725 cellular …	GO:0000428 DNA-directed RNA polymerase complex; GO:0005622 intracellular; GO:0005623 cell; GO:0005634 nucleus; GO:0005654 nucleoplasm; GO:0005666 RNA polymerase III complex; GO:0005730 nucleolus; GO:0005736 RNA polymerase I complex; GO:0005737 cytoplasm; GO:0005829 cytosol; GO:0030880 RNA polymerase complex; GO:0031974 membrane-enclosed lumen; GO:0031981 nuclear lumen; GO:0032991 protein-containi…	GO:0003824 catalytic activity; GO:0003899 DNA-directed 5'-3' RNA polymerase activity; GO:0016740 transferase activity; GO:0016772 transferase activity, transferring phosphorus-containing groups; GO:0016779 nucleotidyltransferase activity; GO:0034062 5'-3' RNA polymerase activity; GO:0097747 RNA polymerase activity; GO:0140098 catalytic activity, acting on RNA;	PF01193; PF01000	RNA polymerase Rpb3/Rpb11 dimerisation domain; RNA polymerase Rpb3/RpoA insert domain	K	KOG1521	RNA polymerase I and III, subunit RPA40/RPC40
Q9JIK5	Nucleolar RNA helicase 2 OS=Mus musculus OX=10090 GN=Ddx21 PE=1 SV=3	Ddx21	2.2905	1.28533e-08	Up	93.55	38.4	26	26	0.652851	0.703769	0.660266	0.657661	0.649238	0.645985	0.651234	0.679637	1.57694	1.54849	1.52255	1.50748	1.5439	nucleus	K16911			GO:0006139 nucleobase-containing compound metabolic process; GO:0006351 transcription, DNA-templated; GO:0006366 transcription by RNA polymerase II; GO:0006725 cellular aromatic compound metabolic process; GO:0006807 nitrogen compound metabolic process; GO:0008152 metabolic process; GO:0009058 biosynthetic process; GO:0009059 macromolecule biosynthetic process; GO:0009605 response to external sti…	GO:0005622 intracellular; GO:0005623 cell; GO:0005634 nucleus; GO:0005654 nucleoplasm; GO:0005730 nucleolus; GO:0005737 cytoplasm; GO:0031974 membrane-enclosed lumen; GO:0031981 nuclear lumen; GO:0043226 organelle; GO:0043227 membrane-bounded organelle; GO:0043228 non-membrane-bounded organelle; GO:0043229 intracellular organelle; GO:0043231 intracellular membrane-bounded organelle; GO:0043232 in…	GO:0003676 nucleic acid binding; GO:0003723 RNA binding; GO:0003724 RNA helicase activity; GO:0003725 double-stranded RNA binding; GO:0003824 catalytic activity; GO:0004386 helicase activity; GO:0005488 binding; GO:0008186 RNA-dependent ATPase activity; GO:0016462 pyrophosphatase activity; GO:0016787 hydrolase activity; GO:0016817 hydrolase activity, acting on acid anhydrides; GO:0016818 hydrolas…	PF00270; PF08152	DEAD/DEAH box helicase; GUCT (NUC152) domain	A	KOG0331	ATP-dependent RNA helicase
Q8R2U4	N-terminal Xaa-Pro-Lys N-methyltransferase 1 OS=Mus musculus OX=10090 GN=Ntmt1 PE=1 SV=3	Ntmt1	2.2876	9.01182e-05	Up	25.42	24.7	4	4		0.692666	0.544815	0.725814	0.581414		0.940552	0.437509	1.41017	1.52169	1.38374	1.42661	1.33502	cytoplasm	K16219			GO:0000226 microtubule cytoskeleton organization; GO:0006325 chromatin organization; GO:0006464 cellular protein modification process; GO:0006479 protein methylation; GO:0006480 N-terminal protein amino acid methylation; GO:0006807 nitrogen compound metabolic process; GO:0006996 organelle organization; GO:0007010 cytoskeleton organization; GO:0007017 microtubule-based process; GO:0007049 cell cyc…	GO:0005622 intracellular; GO:0005623 cell; GO:0005634 nucleus; GO:0005654 nucleoplasm; GO:0005737 cytoplasm; GO:0005829 cytosol; GO:0031974 membrane-enclosed lumen; GO:0031981 nuclear lumen; GO:0043226 organelle; GO:0043227 membrane-bounded organelle; GO:0043229 intracellular organelle; GO:0043231 intracellular membrane-bounded organelle; GO:0043233 organelle lumen; GO:0070013 intracellular organ…	GO:0003824 catalytic activity; GO:0008168 methyltransferase activity; GO:0008276 protein methyltransferase activity; GO:0016740 transferase activity; GO:0016741 transferase activity, transferring one-carbon groups; GO:0042054 histone methyltransferase activity; GO:0071885 N-terminal protein N-methyltransferase activity; GO:0140096 catalytic activity, acting on a protein;			S	KOG3178	Hydroxyindole-O-methyltransferase and related SAM-dependent methyltransferases
Q8CFX1	GDH/6PGL endoplasmic bifunctional protein OS=Mus musculus OX=10090 GN=H6pd PE=1 SV=2	H6pd	2.2867	4.68329e-11	Up	88.927	47.9	31	31	0.646772	0.640879	0.640278	0.728555	0.754415	0.75656	0.741657	0.743173	1.48025	1.46632	1.47702	1.43938	1.48474	extracellular	K13937	H6PD; hexose-6-phosphate dehydrogenase [EC:1.1.1.47 3.1.1.31]	mmu01200 Carbon metabolism; mmu00030 Pentose phosphate pathway; mmu01100 Metabolic pathways	GO:0005975 carbohydrate metabolic process; GO:0006081 cellular aldehyde metabolic process; GO:0006098 pentose-phosphate shunt; GO:0006139 nucleobase-containing compound metabolic process; GO:0006725 cellular aromatic compound metabolic process; GO:0006732 coenzyme metabolic process; GO:0006733 oxidoreduction coenzyme metabolic process; GO:0006739 NADP metabolic process; GO:0006753 nucleoside phos…	GO:0005622 intracellular; GO:0005623 cell; GO:0005737 cytoplasm; GO:0005739 mitochondrion; GO:0005783 endoplasmic reticulum; GO:0005788 endoplasmic reticulum lumen; GO:0012505 endomembrane system; GO:0031974 membrane-enclosed lumen; GO:0043226 organelle; GO:0043227 membrane-bounded organelle; GO:0043229 intracellular organelle; GO:0043231 intracellular membrane-bounded organelle; GO:0043233 organ…	GO:0000166 nucleotide binding; GO:0003824 catalytic activity; GO:0004345 glucose-6-phosphate dehydrogenase activity; GO:0005488 binding; GO:0016491 oxidoreductase activity; GO:0016614 oxidoreductase activity, acting on CH-OH group of donors; GO:0016616 oxidoreductase activity, acting on the CH-OH group of donors, NAD or NADP as acceptor; GO:0016787 hydrolase activity; GO:0016788 hydrolase activit…	PF00479; PF02781; PF01182	Glucose-6-phosphate dehydrogenase, NAD binding domain; Glucose-6-phosphate dehydrogenase, C-terminal domain; Glucosamine-6-phosphate isomerases/6-phosphogluconolactonase	G	KOG3147	6-phosphogluconolactonase - like protein
Q9EQQ9	Protein O-GlcNAcase OS=Mus musculus OX=10090 GN=Oga PE=1 SV=2	Oga	2.2736	8.21714e-07	Up	103.16	31.8	18	18	0.555191	0.623579	0.623548	0.895731	0.857237	0.856987	0.896034	0.862101	1.45042	1.38842	1.38487	1.29041	1.31546	cytoplasm	K15719	NCOAT; protein O-GlcNAcase / histone acetyltransferase [EC:3.2.1.169 2.3.1.48]	mmu04931 Insulin resistance	GO:0002791 regulation of peptide secretion; GO:0002793 positive regulation of peptide secretion; GO:0003254 regulation of membrane depolarization; GO:0006040 amino sugar metabolic process; GO:0006044 N-acetylglucosamine metabolic process; GO:0006139 nucleobase-containing compound metabolic process; GO:0006163 purine nucleotide metabolic process; GO:0006325 chromatin organization; GO:0006464 cellu…	GO:0005622 intracellular; GO:0005623 cell; GO:0005737 cytoplasm; GO:0005739 mitochondrion; GO:0005829 cytosol; GO:0043226 organelle; GO:0043227 membrane-bounded organelle; GO:0043229 intracellular organelle; GO:0043231 intracellular membrane-bounded organelle;	GO:0003824 catalytic activity; GO:0004402 histone acetyltransferase activity; GO:0004415 hyalurononglucosaminidase activity; GO:0004553 hydrolase activity, hydrolyzing O-glycosyl compounds; GO:0004563 beta-N-acetylhexosaminidase activity; GO:0008080 N-acetyltransferase activity; GO:0015929 hexosaminidase activity; GO:0016231 beta-N-acetylglucosaminidase activity; GO:0016407 acetyltransferase acti…			O	KOG3698	Hyaluronoglucosaminidase
Q91VE6	MKI67 FHA domain-interacting nucleolar phosphoprotein OS=Mus musculus OX=10090 GN=Nifk PE=1 SV=1	Nifk	2.2615	0.00116304	Up	36.265	20.5	3	3		0.614409	0.633334		0.752669	0.735723	0.639321	0.570039	1.58315	1.48844	1.52005	1.05687	1.40599	nucleus	K14838			GO:0006139 nucleobase-containing compound metabolic process; GO:0006351 transcription, DNA-templated; GO:0006725 cellular aromatic compound metabolic process; GO:0006807 nitrogen compound metabolic process; GO:0008152 metabolic process; GO:0009058 biosynthetic process; GO:0009059 macromolecule biosynthetic process; GO:0009303 rRNA transcription; GO:0009987 cellular process; GO:0010467 gene expres…	GO:0000228 nuclear chromosome; GO:0000793 condensed chromosome; GO:0000794 condensed nuclear chromosome; GO:0005622 intracellular; GO:0005623 cell; GO:0005634 nucleus; GO:0005654 nucleoplasm; GO:0005694 chromosome; GO:0005730 nucleolus; GO:0005737 cytoplasm; GO:0031974 membrane-enclosed lumen; GO:0031981 nuclear lumen; GO:0043226 organelle; GO:0043227 membrane-bounded organelle; GO:0043228 non-me…	GO:0003676 nucleic acid binding; GO:0003723 RNA binding; GO:0005488 binding; GO:0097159 organic cyclic compound binding; GO:1901363 heterocyclic compound binding;	PF00076; PF12196	RNA recognition motif. (a.k.a. RRM, RBD, or RNP domain); FHA Ki67 binding domain of hNIFK	A	KOG4208	Nucleolar RNA-binding protein NIFK
Q8C8U0	Liprin-beta-1 OS=Mus musculus OX=10090 GN=Ppfibp1 PE=1 SV=3	Ppfibp1	2.2577	7.64576e-08	Up	108.54	40.1	27	26	0.695491	0.634356	0.625649	0.735849	0.740244	0.723566	0.750608	0.735996	1.45254	1.44374	1.50389	1.49243	1.46565	nucleus				GO:0007155 cell adhesion; GO:0022610 biological adhesion;	GO:0005622 intracellular; GO:0005623 cell; GO:0005737 cytoplasm; GO:0005829 cytosol; GO:0005886 plasma membrane; GO:0016020 membrane; GO:0071944 cell periphery;		PF00536; PF07647	SAM domain (Sterile alpha motif); SAM domain (Sterile alpha motif)	S	KOG1899	LAR transmembrane tyrosine phosphatase-interacting protein liprin
Q91ZX7	Prolow-density lipoprotein receptor-related protein 1 OS=Mus musculus OX=10090 GN=Lrp1 PE=1 SV=1	Lrp1	2.2557	2.13381e-08	Up	504.74	16.1	54	54	0.596208	0.58048	0.54429	0.963449	0.951047	0.973832	0.953538	0.967165	1.27348	1.29272	1.29323	1.32143	1.28913	plasma membrane	K04550	LRP1; low-density lipoprotein receptor-related protein 1 (alpha-2-macroglobulin receptor)	mmu04979 Cholesterol metabolism; mmu05144 Malaria; mmu05010 Alzheimer disease	GO:0001568 blood vessel development; GO:0001944 vasculature development; GO:0003205 cardiac chamber development; GO:0003279 cardiac septum development; GO:0006066 alcohol metabolic process; GO:0006629 lipid metabolic process; GO:0006810 transport; GO:0006897 endocytosis; GO:0006898 receptor-mediated endocytosis; GO:0006909 phagocytosis; GO:0007154 cell communication; GO:0007165 signal transductio…	GO:0005622 intracellular; GO:0005623 cell; GO:0005737 cytoplasm; GO:0005768 endosome; GO:0005769 early endosome; GO:0005886 plasma membrane; GO:0005887 integral component of plasma membrane; GO:0012505 endomembrane system; GO:0016020 membrane; GO:0016021 integral component of membrane; GO:0016323 basolateral plasma membrane; GO:0030135 coated vesicle; GO:0030136 clathrin-coated vesicle; GO:003042…	GO:0002020 protease binding; GO:0005488 binding; GO:0005509 calcium ion binding; GO:0005515 protein binding; GO:0016964 alpha-2 macroglobulin receptor activity; GO:0019899 enzyme binding; GO:0030276 clathrin binding; GO:0032050 clathrin heavy chain binding; GO:0034185 apolipoprotein binding; GO:0038024 cargo receptor activity; GO:0043167 ion binding; GO:0043169 cation binding; GO:0044877 protein-…	PF12662; PF07645; PF00008	Complement Clr-like EGF-like; Calcium-binding EGF domain; EGF-like domain	T	KOG1215	Low-density lipoprotein receptors containing Ca2+-binding EGF-like domains
Q4VAA2	Protein CDV3 OS=Mus musculus OX=10090 GN=Cdv3 PE=1 SV=2	Cdv3	2.2425	8.35139e-06	Up	29.729	37	5	5	0.644349	0.519148	0.512963	1.00658	0.959162	1.02683	1.00983	1.05523	1.22997	1.2808	1.21972	1.21627	1.31912	nucleus				GO:0008283 cell population proliferation;	GO:0005622 intracellular; GO:0005623 cell; GO:0005737 cytoplasm; GO:0005829 cytosol; GO:0005886 plasma membrane; GO:0016020 membrane; GO:0071944 cell periphery;
P22366	Myeloid differentiation primary response protein MyD88 OS=Mus musculus OX=10090 GN=Myd88 PE=1 SV=3	Myd88	2.2403	0.000137304	Up	33.753	22.3	6	6	0.726208	0.610095	0.528956	0.972244	0.890744	0.577889	0.722222	1.0072	1.29137	1.25291	1.3455	1.6637	1.41096	cytoplasm	K04729	MYD88; myeloid differentiation primary response protein MyD88	mmu05134 Legionellosis; mmu05161 Hepatitis B; mmu05142 Chagas disease; mmu05135 Yersinia infection; mmu05145 Toxoplasmosis; mmu05169 Epstein-Barr virus infection; mmu05162 Measles; mmu05170 Human immunodeficiency virus 1 infection; mmu05143 African trypanosomiasis; mmu05171 Coronavirus disease - COVID-19; mmu04010 MAPK signaling pathway; mmu05140 Leishmaniasis; mmu04064 NF-kappa B signaling pathw…	GO:0000165 MAPK cascade; GO:0001816 cytokine production; GO:0001817 regulation of cytokine production; GO:0001819 positive regulation of cytokine production; GO:0001885 endothelial cell development; GO:0001932 regulation of protein phosphorylation; GO:0001934 positive regulation of protein phosphorylation; GO:0002064 epithelial cell development; GO:0002218 activation of innate immune response; GO…	GO:0005622 intracellular; GO:0005623 cell; GO:0005634 nucleus; GO:0005737 cytoplasm; GO:0005768 endosome; GO:0005829 cytosol; GO:0005886 plasma membrane; GO:0010008 endosome membrane; GO:0012505 endomembrane system; GO:0014069 postsynaptic density; GO:0016020 membrane; GO:0031090 organelle membrane; GO:0031410 cytoplasmic vesicle; GO:0031982 vesicle; GO:0032279 asymmetric synapse; GO:0032991 prot…	GO:0005102 signaling receptor binding; GO:0005121 Toll binding; GO:0005123 death receptor binding; GO:0005126 cytokine receptor binding; GO:0005149 interleukin-1 receptor binding; GO:0005488 binding; GO:0005515 protein binding; GO:0019904 protein domain specific binding; GO:0032813 tumor necrosis factor receptor superfamily binding; GO:0035325 Toll-like receptor binding; GO:0042802 identical prot…	PF00531	Death domain
Q62465	Synaptic vesicle membrane protein VAT-1 homolog OS=Mus musculus OX=10090 GN=Vat1 PE=1 SV=3	Vat1	2.2366	4.69527e-09	Up	43.096	47.3	14	14	0.597269	0.620673	0.629703	0.838104	0.848994	0.864214	0.841689	0.87206	1.3976	1.4022	1.38298	1.33624	1.36827	cytoplasm	K23167			GO:0001775 cell activation; GO:0002252 immune effector process; GO:0002263 cell activation involved in immune response; GO:0002274 myeloid leukocyte activation; GO:0002275 myeloid cell activation involved in immune response; GO:0002283 neutrophil activation involved in immune response; GO:0002366 leukocyte activation involved in immune response; GO:0002376 immune system process; GO:0002443 leukoc…	GO:0000323 lytic vacuole; GO:0005576 extracellular region; GO:0005622 intracellular; GO:0005623 cell; GO:0005737 cytoplasm; GO:0005739 mitochondrion; GO:0005740 mitochondrial envelope; GO:0005741 mitochondrial outer membrane; GO:0005764 lysosome; GO:0005766 primary lysosome; GO:0005773 vacuole; GO:0005775 vacuolar lumen; GO:0012505 endomembrane system; GO:0016020 membrane; GO:0016021 integral com…		PF08240; PF13602	Alcohol dehydrogenase GroES-like domain; Zinc-binding dehydrogenase	C	KOG1197	Predicted quinone oxidoreductase
Q69ZN7	Myoferlin OS=Mus musculus OX=10090 GN=Myof PE=1 SV=2	Myof	2.235	4.29313e-08	Up	233.32	39.6	62	61	0.535885	0.485521	0.49823	1.17462	1.16111	1.17752	1.15368	1.15291	1.13409	1.11962	1.14423	1.10842	1.15416	peroxisome	K22125			GO:0001778 plasma membrane repair; GO:0003008 system process; GO:0003012 muscle system process; GO:0003013 circulatory system process; GO:0006936 muscle contraction; GO:0006950 response to stress; GO:0007009 plasma membrane organization; GO:0008015 blood circulation; GO:0009266 response to temperature stimulus; GO:0009408 response to heat; GO:0009611 response to wounding; GO:0009628 response to a…	GO:0005622 intracellular; GO:0005623 cell; GO:0005634 nucleus; GO:0005635 nuclear envelope; GO:0005737 cytoplasm; GO:0005886 plasma membrane; GO:0005901 caveola; GO:0012505 endomembrane system; GO:0012506 vesicle membrane; GO:0016020 membrane; GO:0030659 cytoplasmic vesicle membrane; GO:0031090 organelle membrane; GO:0031410 cytoplasmic vesicle; GO:0031965 nuclear membrane; GO:0031967 organelle e…	GO:0005488 binding; GO:0005543 phospholipid binding; GO:0008289 lipid binding; GO:0043167 ion binding; GO:0043168 anion binding;	PF00168; PF08151; PF08165; PF08150	C2 domain; FerI (NUC094) domain; FerA (NUC095) domain; FerB (NUC096) domain	M	KOG1326	Membrane-associated protein FER-1 and related ferlins, contain multiple C2 domains
Q8CJ53	Cdc42-interacting protein 4 OS=Mus musculus OX=10090 GN=Trip10 PE=1 SV=2	Trip10	2.2342	6.58221e-06	Up	68.489	24.2	11	11	0.600492	0.537911	0.694025	0.892883	0.853169	0.906213	0.800932	0.891169	1.41644	1.37119	1.34088	1.35238	1.34232	nucleus	K07196	TRIP10; thyroid hormone receptor interactor 10	mmu04910 Insulin signaling pathway	GO:0001558 regulation of cell growth; GO:0001837 epithelial to mesenchymal transition; GO:0006950 response to stress; GO:0006970 response to osmotic stress; GO:0006972 hyperosmotic response; GO:0006996 organelle organization; GO:0007010 cytoskeleton organization; GO:0007154 cell communication; GO:0007165 signal transduction; GO:0007275 multicellular organism development; GO:0009628 response to ab…	GO:0000323 lytic vacuole; GO:0001891 phagocytic cup; GO:0005622 intracellular; GO:0005623 cell; GO:0005634 nucleus; GO:0005654 nucleoplasm; GO:0005737 cytoplasm; GO:0005764 lysosome; GO:0005773 vacuole; GO:0005794 Golgi apparatus; GO:0005829 cytosol; GO:0005856 cytoskeleton; GO:0005874 microtubule; GO:0005886 plasma membrane; GO:0005938 cell cortex; GO:0012505 endomembrane system; GO:0015630 micr…	GO:0005096 GTPase activator activity; GO:0005488 binding; GO:0005515 protein binding; GO:0008047 enzyme activator activity; GO:0030234 enzyme regulator activity; GO:0030695 GTPase regulator activity; GO:0042802 identical protein binding; GO:0060589 nucleoside-triphosphatase regulator activity; GO:0098772 molecular function regulator;	PF00018	SH3 domain	Z	KOG3565	Cdc42-interacting protein CIP4
Q9CWP6	Motile sperm domain-containing protein 2 OS=Mus musculus OX=10090 GN=Mospd2 PE=1 SV=2	Mospd2	2.2336	8.6116e-05	Up	59.854	14.9	6	6	0.522758	0.602816	0.745184	0.8833	0.831875	0.868711	0.757692	0.823389	1.38944	1.41075	1.41334	1.23596	1.51478	cytoplasm				GO:0001775 cell activation; GO:0002252 immune effector process; GO:0002263 cell activation involved in immune response; GO:0002274 myeloid leukocyte activation; GO:0002275 myeloid cell activation involved in immune response; GO:0002283 neutrophil activation involved in immune response; GO:0002366 leukocyte activation involved in immune response; GO:0002376 immune system process; GO:0002443 leukoc…	GO:0005622 intracellular; GO:0005623 cell; GO:0005737 cytoplasm; GO:0005886 plasma membrane; GO:0005887 integral component of plasma membrane; GO:0012505 endomembrane system; GO:0012506 vesicle membrane; GO:0016020 membrane; GO:0016021 integral component of membrane; GO:0030141 secretory granule; GO:0030659 cytoplasmic vesicle membrane; GO:0030667 secretory granule membrane; GO:0031090 organelle …		PF00650; PF00635	CRAL/TRIO domain; MSP (Major sperm protein) domain	I	KOG1470	Phosphatidylinositol transfer protein PDR16 and related proteins
Q8K0E8	Fibrinogen beta chain OS=Mus musculus OX=10090 GN=Fgb PE=1 SV=1	Fgb	2.231	1.63597e-10	Up	54.752	70.1	32	32	0.765098	0.76237	0.781129	0.417014	0.42124	0.431651	0.417384	0.420039	1.73079	1.71937	1.73879	1.68318	1.71195	extracellular	K03904	FGB; fibrinogen beta chain	mmu05171 Coronavirus disease - COVID-19; mmu04610 Complement and coagulation cascades; mmu04611 Platelet activation	GO:0001775 cell activation; GO:0001932 regulation of protein phosphorylation; GO:0001934 positive regulation of protein phosphorylation; GO:0002218 activation of innate immune response; GO:0002221 pattern recognition receptor signaling pathway; GO:0002224 toll-like receptor signaling pathway; GO:0002253 activation of immune response; GO:0002376 immune system process; GO:0002576 platelet degranula…	GO:0005576 extracellular region; GO:0005577 fibrinogen complex; GO:0005615 extracellular space; GO:0005622 intracellular; GO:0005623 cell; GO:0005737 cytoplasm; GO:0005783 endoplasmic reticulum; GO:0005886 plasma membrane; GO:0005938 cell cortex; GO:0009897 external side of plasma membrane; GO:0009986 cell surface; GO:0012505 endomembrane system; GO:0016020 membrane; GO:0030141 secretory granule;…	GO:0005198 structural molecule activity; GO:0005488 binding; GO:0005515 protein binding; GO:0051087 chaperone binding;	PF00147	Fibrinogen beta and gamma chains, C-terminal globular domain	T	KOG2579	Ficolin and related extracellular proteins
P51125	Calpastatin OS=Mus musculus OX=10090 GN=Cast PE=1 SV=2	Cast	2.2257	3.46517e-08	Up	84.921	33	16	16	0.617905	0.579851	0.604987	0.906443	0.937962	0.938449	0.843588	0.883686	1.32757	1.32982	1.3213	1.30019	1.40825	nucleus	K04281			GO:0000003 reproduction; GO:0000768 syncytium formation by plasma membrane fusion; GO:0001775 cell activation; GO:0001889 liver development; GO:0006807 nitrogen compound metabolic process; GO:0006949 syncytium formation; GO:0007275 multicellular organism development; GO:0007338 single fertilization; GO:0007343 egg activation; GO:0007399 nervous system development; GO:0007417 central nervous syste…	GO:0005622 intracellular; GO:0005623 cell; GO:0005634 nucleus; GO:0005737 cytoplasm; GO:0005783 endoplasmic reticulum; GO:0005829 cytosol; GO:0012505 endomembrane system; GO:0014069 postsynaptic density; GO:0016020 membrane; GO:0032279 asymmetric synapse; GO:0043226 organelle; GO:0043227 membrane-bounded organelle; GO:0043229 intracellular organelle; GO:0043231 intracellular membrane-bounded orga…	GO:0002020 protease binding; GO:0004857 enzyme inhibitor activity; GO:0004866 endopeptidase inhibitor activity; GO:0004869 cysteine-type endopeptidase inhibitor activity; GO:0005488 binding; GO:0005515 protein binding; GO:0010859 calcium-dependent cysteine-type endopeptidase inhibitor activity; GO:0019899 enzyme binding; GO:0030234 enzyme regulator activity; GO:0030414 peptidase inhibitor activit…
Q91XL3	UDP-glucuronic acid decarboxylase 1 OS=Mus musculus OX=10090 GN=Uxs1 PE=1 SV=1	Uxs1	2.2212	0.000212079	Up	47.552	21	4	4	0.704212	0.495868	0.773352	0.968334	0.771091	0.76136	0.501555	0.718739	1.41308	1.40438	1.48065	1.43429	1.57309	mitochondria	K08678	UXS1; UDP-glucuronate decarboxylase [EC:4.1.1.35]	mmu00520 Amino sugar and nucleotide sugar metabolism; mmu01100 Metabolic pathways	GO:0009987 cellular process; GO:0016043 cellular component organization; GO:0022607 cellular component assembly; GO:0043933 protein-containing complex subunit organization; GO:0044085 cellular component biogenesis; GO:0051259 protein complex oligomerization; GO:0051262 protein tetramerization; GO:0065003 protein-containing complex assembly; GO:0071840 cellular component organization or biogenesis;	GO:0005622 intracellular; GO:0005623 cell; GO:0005737 cytoplasm; GO:0005794 Golgi apparatus; GO:0012505 endomembrane system; GO:0043226 organelle; GO:0043227 membrane-bounded organelle; GO:0043229 intracellular organelle; GO:0043231 intracellular membrane-bounded organelle;	GO:0000166 nucleotide binding; GO:0003824 catalytic activity; GO:0005488 binding; GO:0005515 protein binding; GO:0016829 lyase activity; GO:0016830 carbon-carbon lyase activity; GO:0016831 carboxy-lyase activity; GO:0036094 small molecule binding; GO:0042802 identical protein binding; GO:0042803 protein homodimerization activity; GO:0043167 ion binding; GO:0043168 anion binding; GO:0046983 protei…			G	KOG1429	dTDP-glucose 4-6-dehydratase/UDP-glucuronic acid decarboxylase
Q3UGS4	Mapk-regulated corepressor-interacting protein 1 OS=Mus musculus OX=10090 GN=Mcrip1 PE=1 SV=1	Mcrip1	2.2154	0.0024208	Up	11.101	41.2	3	3		0.548573	0.651345	1.01229	0.721467	0.661251	0.908316	0.85103	1.10072	1.08039	1.37574	1.55113	1.53774	mitochondria				GO:0010717 regulation of epithelial to mesenchymal transition; GO:0045595 regulation of cell differentiation; GO:0050789 regulation of biological process; GO:0050793 regulation of developmental process; GO:0050794 regulation of cellular process; GO:0051239 regulation of multicellular organismal process; GO:0065007 biological regulation; GO:2000026 regulation of multicellular organismal developmen…	GO:0005622 intracellular; GO:0005623 cell; GO:0005634 nucleus; GO:0005737 cytoplasm; GO:0010494 cytoplasmic stress granule; GO:0032991 protein-containing complex; GO:0035770 ribonucleoprotein granule; GO:0036464 cytoplasmic ribonucleoprotein granule; GO:0043226 organelle; GO:0043227 membrane-bounded organelle; GO:0043228 non-membrane-bounded organelle; GO:0043229 intracellular organelle; GO:00432…
Q9JJA4	Ribosome biogenesis protein WDR12 OS=Mus musculus OX=10090 GN=Wdr12 PE=1 SV=1	Wdr12	2.2144	0.000128047	Up	47.346	18	5	5	0.801534	0.609131	0.619211	0.706369	0.74345	0.669456	0.739371	0.619918	1.33229	1.37188	1.54822	1.75429	1.48488	nucleus	K14863			GO:0000460 maturation of 5.8S rRNA; GO:0000463 maturation of LSU-rRNA from tricistronic rRNA transcript (SSU-rRNA, 5.8S rRNA, LSU-rRNA); GO:0000466 maturation of 5.8S rRNA from tricistronic rRNA transcript (SSU-rRNA, 5.8S rRNA, LSU-rRNA); GO:0000470 maturation of LSU-rRNA; GO:0006139 nucleobase-containing compound metabolic process; GO:0006364 rRNA processing; GO:0006396 RNA processing; GO:000672…	GO:0005622 intracellular; GO:0005623 cell; GO:0005634 nucleus; GO:0005654 nucleoplasm; GO:0005730 nucleolus; GO:0030684 preribosome; GO:0030686 90S preribosome; GO:0030687 preribosome, large subunit precursor; GO:0031974 membrane-enclosed lumen; GO:0031981 nuclear lumen; GO:0032991 protein-containing complex; GO:0043226 organelle; GO:0043227 membrane-bounded organelle; GO:0043228 non-membrane-bou…		PF08154	NLE (NUC135) domain	Z	KOG0313	Microtubule binding protein YTM1 (contains WD40 repeats)
Q3UQ28	Peroxidasin homolog OS=Mus musculus OX=10090 GN=Pxdn PE=1 SV=2	Pxdn	2.2139	1.19412e-06	Up	165.1	12.7	13	13	0.495846	0.555902	0.521333	1.18044	1.12354	1.14413	1.17545	0.998906	1.22365	1.08073	1.14268	1.22905	1.12834	extracellular	K19511			GO:0008152 metabolic process; GO:0009056 catabolic process; GO:0009636 response to toxic substance; GO:0009987 cellular process; GO:0016043 cellular component organization; GO:0016999 antibiotic metabolic process; GO:0017001 antibiotic catabolic process; GO:0017144 drug metabolic process; GO:0030198 extracellular matrix organization; GO:0042221 response to chemical; GO:0042737 drug catabolic proc…	GO:0005576 extracellular region; GO:0005622 intracellular; GO:0005623 cell; GO:0005737 cytoplasm; GO:0005783 endoplasmic reticulum; GO:0012505 endomembrane system; GO:0031012 extracellular matrix; GO:0043226 organelle; GO:0043227 membrane-bounded organelle; GO:0043229 intracellular organelle; GO:0043231 intracellular membrane-bounded organelle;	GO:0003824 catalytic activity; GO:0004601 peroxidase activity; GO:0005198 structural molecule activity; GO:0005201 extracellular matrix structural constituent; GO:0005488 binding; GO:0016209 antioxidant activity; GO:0016491 oxidoreductase activity; GO:0016684 oxidoreductase activity, acting on peroxide as acceptor; GO:0020037 heme binding; GO:0046906 tetrapyrrole binding; GO:0048037 cofactor bind…	PF07679; PF03098	Immunoglobulin I-set domain; Animal haem peroxidase	T	KOG2408	Peroxidase/oxygenase
P29533	Vascular cell adhesion protein 1 OS=Mus musculus OX=10090 GN=Vcam1 PE=1 SV=1	Vcam1	2.2001	0.00873883	Up	81.317	16.9	8	8		0.719043	0.354527	1.06461	1.01858	0.935063	1.06045	0.942768	1.16802	1.26056	0.984337	1.2653	1.22675	plasma membrane	K06527	VCAM1; vascular cell adhesion molecule 1	mmu04064 NF-kappa B signaling pathway; mmu04668 TNF signaling pathway; mmu04670 Leukocyte transendothelial migration; mmu05418 Fluid shear stress and atherosclerosis; mmu05144 Malaria; mmu04933 AGE-RAGE signaling pathway in diabetic complications; mmu04514 Cell adhesion molecules; mmu05143 African trypanosomiasis	GO:0000003 reproduction; GO:0001666 response to hypoxia; GO:0001678 cellular glucose homeostasis; GO:0001701 in utero embryonic development; GO:0001775 cell activation; GO:0001890 placenta development; GO:0001892 embryonic placenta development; GO:0002237 response to molecule of bacterial origin; GO:0002376 immune system process; GO:0002520 immune system development; GO:0002521 leukocyte differen…	GO:0002102 podosome; GO:0005576 extracellular region; GO:0005615 extracellular space; GO:0005622 intracellular; GO:0005623 cell; GO:0005737 cytoplasm; GO:0005768 endosome; GO:0005769 early endosome; GO:0005783 endoplasmic reticulum; GO:0005794 Golgi apparatus; GO:0005856 cytoskeleton; GO:0005886 plasma membrane; GO:0005902 microvillus; GO:0009897 external side of plasma membrane; GO:0009986 cell …	GO:0003824 catalytic activity; GO:0005102 signaling receptor binding; GO:0005178 integrin binding; GO:0005488 binding; GO:0005515 protein binding; GO:0008131 primary amine oxidase activity; GO:0016491 oxidoreductase activity; GO:0016638 oxidoreductase activity, acting on the CH-NH2 group of donors; GO:0016641 oxidoreductase activity, acting on the CH-NH2 group of donors, oxygen as acceptor; GO:00…	PF07679; PF05790; PF00047; PF13927	Immunoglobulin I-set domain; Immunoglobulin C2-set domain; Immunoglobulin domain; Immunoglobulin domain
Q9D8C4	Interferon-induced 35 kDa protein homolog OS=Mus musculus OX=10090 GN=Ifi35 PE=1 SV=3	Ifi35	2.197	2.67636e-05	Up	31.875	40.6	7	7	0.506037	0.665784	0.654799	0.93231	0.929027	0.763872	0.932962	0.926878	1.37635	1.31484	1.25195	1.36561	1.37959	cytoplasm				GO:0002376 immune system process; GO:0006950 response to stress; GO:0006952 defense response; GO:0006955 immune response; GO:0007154 cell communication; GO:0007165 signal transduction; GO:0007166 cell surface receptor signaling pathway; GO:0009987 cellular process; GO:0010033 response to organic substance; GO:0019221 cytokine-mediated signaling pathway; GO:0023052 signaling; GO:0034097 response t…	GO:0005622 intracellular; GO:0005623 cell; GO:0005634 nucleus; GO:0005737 cytoplasm; GO:0005829 cytosol; GO:0043226 organelle; GO:0043227 membrane-bounded organelle; GO:0043229 intracellular organelle; GO:0043231 intracellular membrane-bounded organelle;		PF07292	Nmi/IFP 35 domain (NID)
P47226	Testin OS=Mus musculus OX=10090 GN=Tes PE=1 SV=1	Tes	2.1963	4.3449e-07	Up	47.983	40.7	12	12	0.663933	0.646987	0.601594	0.836716	0.820571	0.83278	0.827768	0.76885	1.44245	1.41625	1.37288	1.308	1.46122	nucleus	K24270			GO:0008285 negative regulation of cell population proliferation; GO:0042127 regulation of cell population proliferation; GO:0048519 negative regulation of biological process; GO:0048523 negative regulation of cellular process; GO:0050789 regulation of biological process; GO:0050794 regulation of cellular process; GO:0065007 biological regulation;	GO:0005622 intracellular; GO:0005623 cell; GO:0005737 cytoplasm; GO:0005829 cytosol; GO:0005886 plasma membrane; GO:0005912 adherens junction; GO:0005925 focal adhesion; GO:0016020 membrane; GO:0030054 cell junction; GO:0030055 cell-substrate junction; GO:0032991 protein-containing complex; GO:0070161 anchoring junction; GO:0071944 cell periphery;	GO:0005488 binding; GO:0008270 zinc ion binding; GO:0043167 ion binding; GO:0043169 cation binding; GO:0046872 metal ion binding; GO:0046914 transition metal ion binding;	PF06297; PF00412	PET Domain; LIM domain	TZ	KOG1704	FOG: LIM domain
Q99P72	Reticulon-4 OS=Mus musculus OX=10090 GN=Rtn4 PE=1 SV=2	Rtn4	2.1898	4.65403e-09	Up	126.61	30.6	21	21	0.656887	0.640239	0.613914	0.806377	0.833346	0.828533	0.803617	0.842477	1.37619	1.38731	1.40352	1.39049	1.41711	plasma membrane	K20720	RTN4; reticulon-4	mmu05010 Alzheimer disease	GO:0001525 angiogenesis; GO:0001558 regulation of cell growth; GO:0001568 blood vessel development; GO:0001837 epithelial to mesenchymal transition; GO:0001944 vasculature development; GO:0003007 heart morphogenesis; GO:0006928 movement of cell or subcellular component; GO:0006996 organelle organization; GO:0006997 nucleus organization; GO:0006999 nuclear pore organization; GO:0007029 endoplasmic…	GO:0005622 intracellular; GO:0005623 cell; GO:0005634 nucleus; GO:0005635 nuclear envelope; GO:0005737 cytoplasm; GO:0005783 endoplasmic reticulum; GO:0005789 endoplasmic reticulum membrane; GO:0005886 plasma membrane; GO:0012505 endomembrane system; GO:0014069 postsynaptic density; GO:0016020 membrane; GO:0016021 integral component of membrane; GO:0030176 integral component of endoplasmic reticu…	GO:0005488 binding; GO:0005515 protein binding; GO:0019899 enzyme binding; GO:0031625 ubiquitin protein ligase binding; GO:0044389 ubiquitin-like protein ligase binding; GO:0044877 protein-containing complex binding;			U	KOG1792	Reticulon
Q9WVB0	RNA-binding protein with multiple splicing OS=Mus musculus OX=10090 GN=Rbpms PE=1 SV=2	Rbpms	2.1896	4.68162e-07	Up	21.816	46.2	8	7	0.713394	0.681164	0.708734	0.620184	0.67903	0.655671	0.609291	0.656963	1.60619	1.5848	1.59614	1.44414	1.44431	cytoplasm				GO:0000375 RNA splicing, via transesterification reactions; GO:0000377 RNA splicing, via transesterification reactions with bulged adenosine as nucleophile; GO:0000398 mRNA splicing, via spliceosome; GO:0001932 regulation of protein phosphorylation; GO:0001934 positive regulation of protein phosphorylation; GO:0006139 nucleobase-containing compound metabolic process; GO:0006396 RNA processing; GO…	GO:0005622 intracellular; GO:0005623 cell; GO:0005634 nucleus; GO:0005654 nucleoplasm; GO:0005685 U1 snRNP; GO:0005737 cytoplasm; GO:0005829 cytosol; GO:0010494 cytoplasmic stress granule; GO:0030532 small nuclear ribonucleoprotein complex; GO:0031974 membrane-enclosed lumen; GO:0031981 nuclear lumen; GO:0032991 protein-containing complex; GO:0035770 ribonucleoprotein granule; GO:0036464 cytoplas…	GO:0003676 nucleic acid binding; GO:0003712 transcription coregulator activity; GO:0003713 transcription coactivator activity; GO:0003723 RNA binding; GO:0003727 single-stranded RNA binding; GO:0005488 binding; GO:0005515 protein binding; GO:0008143 poly(A) binding; GO:0017069 snRNA binding; GO:0030619 U1 snRNA binding; GO:0035613 RNA stem-loop binding; GO:0035614 snRNA stem-loop binding; GO:0042…	PF00076	RNA recognition motif. (a.k.a. RRM, RBD, or RNP domain)	A	KOG1457	RNA binding protein (contains RRM repeats)
Q7TNE3	Sperm-associated antigen 7 OS=Mus musculus OX=10090 GN=Spag7 PE=1 SV=1	Spag7	2.184	0.00963355	Up	25.921	27.8	5	5	0.850406	0.357892	0.692763	0.898197	0.75999	0.894782	0.774473	0.85165	1.15692	1.18524	1.36525	1.8613	1.35114	nucleus							PF01424	R3H domain
Q64449	C-type mannose receptor 2 OS=Mus musculus OX=10090 GN=Mrc2 PE=1 SV=3	Mrc2	2.1788	3.55179e-07	Up	167.07	24.8	28	28	0.455235	0.403287	0.43292	1.42917	1.36528	1.44438	1.41499	1.36504	0.909158	0.901596	0.971968	0.942811	0.964162	peroxisome	K06560	MRC; mannose receptor, C type	mmu04145 Phagosome; mmu05152 Tuberculosis	GO:0007154 cell communication; GO:0007165 signal transduction; GO:0008152 metabolic process; GO:0009056 catabolic process; GO:0009987 cellular process; GO:0023052 signaling; GO:0030574 collagen catabolic process; GO:0032963 collagen metabolic process; GO:0050789 regulation of biological process; GO:0050794 regulation of cellular process; GO:0050896 response to stimulus; GO:0051716 cellular respon…	GO:0005623 cell; GO:0005886 plasma membrane; GO:0005887 integral component of plasma membrane; GO:0009986 cell surface; GO:0016020 membrane; GO:0016021 integral component of membrane; GO:0031224 intrinsic component of membrane; GO:0031226 intrinsic component of plasma membrane; GO:0071944 cell periphery;	GO:0004888 transmembrane signaling receptor activity; GO:0005488 binding; GO:0005518 collagen binding; GO:0030246 carbohydrate binding; GO:0038023 signaling receptor activity; GO:0044877 protein-containing complex binding; GO:0060089 molecular transducer activity;	PF00040; PF00059	Fibronectin type II domain; Lectin C-type domain	T	KOG4297	C-type lectin
Q62048	Astrocytic phosphoprotein PEA-15 OS=Mus musculus OX=10090 GN=Pea15 PE=1 SV=1	Pea15	2.1767	4.40988e-07	Up	15.054	50.8	6	6	0.586689	0.560664	0.644866	0.947378	0.92493	0.958915	0.914779	0.959944	1.28589	1.32555	1.33861	1.25311	1.29868	cytoplasm				GO:0007154 cell communication; GO:0007165 signal transduction; GO:0009966 regulation of signal transduction; GO:0009967 positive regulation of signal transduction; GO:0009968 negative regulation of signal transduction; GO:0009987 cellular process; GO:0010646 regulation of cell communication; GO:0010647 positive regulation of cell communication; GO:0010648 negative regulation of cell communication…	GO:0005622 intracellular; GO:0005623 cell; GO:0005634 nucleus; GO:0005737 cytoplasm; GO:0005829 cytosol; GO:0005856 cytoskeleton; GO:0005875 microtubule associated complex; GO:0015630 microtubule cytoskeleton; GO:0032991 protein-containing complex; GO:0043226 organelle; GO:0043227 membrane-bounded organelle; GO:0043228 non-membrane-bounded organelle; GO:0043229 intracellular organelle; GO:0043231…	GO:0005080 protein kinase C binding; GO:0005488 binding; GO:0005515 protein binding; GO:0019899 enzyme binding; GO:0019900 kinase binding; GO:0019901 protein kinase binding;	PF01335	Death effector domain	D	KOG3573	Caspase, apoptotic cysteine protease
Q810D6	Glutamate-rich WD repeat-containing protein 1 OS=Mus musculus OX=10090 GN=Grwd1 PE=1 SV=2	Grwd1	2.1675	0.00319064	Up	49.223	26.9	5	5	0.54823	0.529996	0.601393	0.948724	1.12514	0.934454	1.20022	1.04414	1.58467	0.928392	0.901624	1.16287	1.49015	nucleus	K14848			GO:0006139 nucleobase-containing compound metabolic process; GO:0006259 DNA metabolic process; GO:0006260 DNA replication; GO:0006323 DNA packaging; GO:0006325 chromatin organization; GO:0006333 chromatin assembly or disassembly; GO:0006334 nucleosome assembly; GO:0006337 nucleosome disassembly; GO:0006725 cellular aromatic compound metabolic process; GO:0006807 nitrogen compound metabolic proces…	GO:0005622 intracellular; GO:0005623 cell; GO:0005634 nucleus; GO:0005730 nucleolus; GO:0005737 cytoplasm; GO:0005829 cytosol; GO:0031974 membrane-enclosed lumen; GO:0031981 nuclear lumen; GO:0032991 protein-containing complex; GO:0043226 organelle; GO:0043227 membrane-bounded organelle; GO:0043228 non-membrane-bounded organelle; GO:0043229 intracellular organelle; GO:0043231 intracellular membra…	GO:0003676 nucleic acid binding; GO:0003677 DNA binding; GO:0003682 chromatin binding; GO:0003688 DNA replication origin binding; GO:0003690 double-stranded DNA binding; GO:0005488 binding; GO:0005515 protein binding; GO:0042393 histone binding; GO:0043565 sequence-specific DNA binding; GO:0097159 organic cyclic compound binding; GO:1901363 heterocyclic compound binding; GO:1990837 sequence-speci…			B	KOG0302	Ribosome Assembly protein
Q99J93	Interferon-induced transmembrane protein 2 OS=Mus musculus OX=10090 GN=Ifitm2 PE=1 SV=1	Ifitm2	2.1637	5.47809e-06	Up	15.743	29.2	3	2	0.683061	0.559055	0.67748	0.840631	0.831847	0.829771	0.83009	0.825538	1.41087	1.39243	1.44162	1.33837	1.33924	plasma membrane	K06566			GO:0002252 immune effector process; GO:0002376 immune system process; GO:0002682 regulation of immune system process; GO:0006810 transport; GO:0006897 endocytosis; GO:0006898 receptor-mediated endocytosis; GO:0006950 response to stress; GO:0006952 defense response; GO:0006955 immune response; GO:0007154 cell communication; GO:0007165 signal transduction; GO:0007166 cell surface receptor signaling…	GO:0005622 intracellular; GO:0005623 cell; GO:0005634 nucleus; GO:0005737 cytoplasm; GO:0005783 endoplasmic reticulum; GO:0005886 plasma membrane; GO:0009986 cell surface; GO:0012505 endomembrane system; GO:0016020 membrane; GO:0031410 cytoplasmic vesicle; GO:0031982 vesicle; GO:0043226 organelle; GO:0043227 membrane-bounded organelle; GO:0043229 intracellular organelle; GO:0043231 intracellular …
Q3V1T4	Prolyl 3-hydroxylase 1 OS=Mus musculus OX=10090 GN=P3h1 PE=1 SV=2	P3h1	2.1624	0.00386679	Up	83.65	9.7	5	5	0.714284	0.75109	0.433054	0.856379	0.871676	0.845244	0.886328	0.800028	0.977961	1.3939	1.47156	1.63639	1.36211	extracellular	K08134			GO:0001501 skeletal system development; GO:0001558 regulation of cell growth; GO:0002791 regulation of peptide secretion; GO:0006457 protein folding; GO:0006464 cellular protein modification process; GO:0006807 nitrogen compound metabolic process; GO:0007275 multicellular organism development; GO:0007399 nervous system development; GO:0008152 metabolic process; GO:0008285 negative regulation of c…	GO:0005576 extracellular region; GO:0005604 basement membrane; GO:0005622 intracellular; GO:0005623 cell; GO:0005634 nucleus; GO:0005737 cytoplasm; GO:0005783 endoplasmic reticulum; GO:0005788 endoplasmic reticulum lumen; GO:0005886 plasma membrane; GO:0012505 endomembrane system; GO:0016020 membrane; GO:0031012 extracellular matrix; GO:0031974 membrane-enclosed lumen; GO:0032991 protein-containi…	GO:0003824 catalytic activity; GO:0005488 binding; GO:0016491 oxidoreductase activity; GO:0016705 oxidoreductase activity, acting on paired donors, with incorporation or reduction of molecular oxygen; GO:0016706 2-oxoglutarate-dependent dioxygenase activity; GO:0019797 procollagen-proline 3-dioxygenase activity; GO:0019798 procollagen-proline dioxygenase activity; GO:0031543 peptidyl-proline diox…	PF13640	2OG-Fe(II) oxygenase superfamily	S	KOG4459	Membrane-associated proteoglycan Leprecan
P58501	PAX3- and PAX7-binding protein 1 OS=Mus musculus OX=10090 GN=Paxbp1 PE=1 SV=3	Paxbp1	2.158	0.0110865	Up	104.83	10.1	6	6	0.370274	0.725762		1.17929	0.948524	1.06624	0.949173	0.847588	1.35346	1.17967	0.946088	1.11792	1.31601	nucleus	K13211			GO:0006355 regulation of transcription, DNA-templated; GO:0006357 regulation of transcription by RNA polymerase II; GO:0008284 positive regulation of cell population proliferation; GO:0009889 regulation of biosynthetic process; GO:0009891 positive regulation of biosynthetic process; GO:0009893 positive regulation of metabolic process; GO:0010468 regulation of gene expression; GO:0010556 regulatio…	GO:0005622 intracellular; GO:0005623 cell; GO:0005634 nucleus; GO:0043226 organelle; GO:0043227 membrane-bounded organelle; GO:0043229 intracellular organelle; GO:0043231 intracellular membrane-bounded organelle;	GO:0000976 transcription regulatory region sequence-specific DNA binding; GO:0000977 RNA polymerase II transcription regulatory region sequence-specific DNA binding; GO:0000978 RNA polymerase II cis-regulatory region sequence-specific DNA binding; GO:0000987 cis-regulatory region sequence-specific DNA binding; GO:0001067 regulatory region nucleic acid binding; GO:0003676 nucleic acid binding; GO:…			K	KOG2136	Transcriptional regulators binding to the GC-rich sequences
P27546	Microtubule-associated protein 4 OS=Mus musculus OX=10090 GN=Map4 PE=1 SV=3	Map4	2.1522	2.20835e-07	Up	117.43	48	33	33	0.593464	0.613239	0.665825	0.902886	0.874023	0.851112	0.866386	0.916446	1.36147	1.39817	1.32706	1.32105	1.30886	nucleus	K10431			GO:0000226 microtubule cytoskeleton organization; GO:0000278 mitotic cell cycle; GO:0006928 movement of cell or subcellular component; GO:0006996 organelle organization; GO:0007010 cytoskeleton organization; GO:0007017 microtubule-based process; GO:0007018 microtubule-based movement; GO:0007049 cell cycle; GO:0007051 spindle organization; GO:0007052 mitotic spindle organization; GO:0007163 establ…	GO:0005622 intracellular; GO:0005623 cell; GO:0005737 cytoplasm; GO:0005819 spindle; GO:0005829 cytosol; GO:0005856 cytoskeleton; GO:0005875 microtubule associated complex; GO:0005886 plasma membrane; GO:0005929 cilium; GO:0005930 axoneme; GO:0014069 postsynaptic density; GO:0015630 microtubule cytoskeleton; GO:0016020 membrane; GO:0030424 axon; GO:0032279 asymmetric synapse; GO:0032838 plasma me…	GO:0005198 structural molecule activity; GO:0005488 binding; GO:0005515 protein binding; GO:0008017 microtubule binding; GO:0008092 cytoskeletal protein binding; GO:0015631 tubulin binding;			Z	KOG2418	Microtubule-associated protein TAU
P97479	Unconventional myosin-VIIa OS=Mus musculus OX=10090 GN=Myo7a PE=1 SV=2	Myo7a	2.1521	5.74821e-07	Up	254.94	15	24	21	0.589287	0.604406	0.681474	0.895931	0.897382	0.830113	0.903414	0.87193	1.34783	1.38387	1.31243	1.32701	1.35493	cytoplasm	K10359			GO:0000902 cell morphogenesis; GO:0000904 cell morphogenesis involved in differentiation; GO:0001654 eye development; GO:0001754 eye photoreceptor cell differentiation; GO:0001845 phagolysosome assembly; GO:0002064 epithelial cell development; GO:0002065 columnar/cuboidal epithelial cell differentiation; GO:0002066 columnar/cuboidal epithelial cell development; GO:0002093 auditory receptor cell m…	GO:0000323 lytic vacuole; GO:0001750 photoreceptor outer segment; GO:0001917 photoreceptor inner segment; GO:0002139 stereocilia coupling link; GO:0002140 stereocilia tip link; GO:0005622 intracellular; GO:0005623 cell; GO:0005737 cytoplasm; GO:0005764 lysosome; GO:0005765 lysosomal membrane; GO:0005773 vacuole; GO:0005774 vacuolar membrane; GO:0005829 cytosol; GO:0005856 cytoskeleton; GO:0005886…	GO:0000146 microfilament motor activity; GO:0000166 nucleotide binding; GO:0003774 motor activity; GO:0003779 actin binding; GO:0003824 catalytic activity; GO:0005488 binding; GO:0005515 protein binding; GO:0005516 calmodulin binding; GO:0005524 ATP binding; GO:0008092 cytoskeletal protein binding; GO:0008144 drug binding; GO:0016462 pyrophosphatase activity; GO:0016787 hydrolase activity; GO:001…	PF00063; PF00373	Myosin head (motor domain); FERM central domain	Z	KOG4229	Myosin VII, myosin IXB and related myosins
Q8K297	Procollagen galactosyltransferase 1 OS=Mus musculus OX=10090 GN=Colgalt1 PE=1 SV=2	Colgalt1	2.1506	1.04138e-06	Up	71.06	22	11	11	0.63849	0.60875	0.70561	0.791586	0.881763	0.829924	0.741954	0.802353	1.41851	1.32128	1.46085	1.40286	1.39608	extracellular	K11703	GLT25D; collagen beta-1,O-galactosyltransferase [EC:2.4.1.50]	mmu00310 Lysine degradation; mmu00514 Other types of O-glycan biosynthesis; mmu01100 Metabolic pathways	GO:0048518 positive regulation of biological process; GO:0048522 positive regulation of cellular process; GO:0050789 regulation of biological process; GO:0050794 regulation of cellular process; GO:0051128 regulation of cellular component organization; GO:0051130 positive regulation of cellular component organization; GO:0065007 biological regulation; GO:1902903 regulation of supramolecular fiber …	GO:0005622 intracellular; GO:0005623 cell; GO:0005737 cytoplasm; GO:0005783 endoplasmic reticulum; GO:0005788 endoplasmic reticulum lumen; GO:0012505 endomembrane system; GO:0031974 membrane-enclosed lumen; GO:0043226 organelle; GO:0043227 membrane-bounded organelle; GO:0043229 intracellular organelle; GO:0043231 intracellular membrane-bounded organelle; GO:0043233 organelle lumen; GO:0070013 int…	GO:0003824 catalytic activity; GO:0008194 UDP-glycosyltransferase activity; GO:0008378 galactosyltransferase activity; GO:0016740 transferase activity; GO:0016757 transferase activity, transferring glycosyl groups; GO:0016758 transferase activity, transferring hexosyl groups; GO:0035250 UDP-galactosyltransferase activity; GO:0050211 procollagen galactosyltransferase activity; GO:0140096 catalytic…			O	KOG4179	Lysyl hydrolase/glycosyltransferase family 25
Q3UDW8	Heparan-alpha-glucosaminide N-acetyltransferase OS=Mus musculus OX=10090 GN=Hgsnat PE=1 SV=2	Hgsnat	2.1482	1.15175e-05	Up	72.503	6.9	4	4	0.769393	0.607224	0.683014	0.706763	0.79047	0.800942	0.669202	0.598957	1.48621	1.42238	1.46901	1.40264	1.5938	plasma membrane	K10532	HGSNAT; heparan-alpha-glucosaminide N-acetyltransferase [EC:2.3.1.78]	mmu04142 Lysosome; mmu00531 Glycosaminoglycan degradation; mmu01100 Metabolic pathways	GO:0001775 cell activation; GO:0002252 immune effector process; GO:0002263 cell activation involved in immune response; GO:0002274 myeloid leukocyte activation; GO:0002275 myeloid cell activation involved in immune response; GO:0002283 neutrophil activation involved in immune response; GO:0002366 leukocyte activation involved in immune response; GO:0002376 immune system process; GO:0002443 leukoc…	GO:0000323 lytic vacuole; GO:0005622 intracellular; GO:0005623 cell; GO:0005737 cytoplasm; GO:0005764 lysosome; GO:0005765 lysosomal membrane; GO:0005773 vacuole; GO:0005774 vacuolar membrane; GO:0005886 plasma membrane; GO:0012505 endomembrane system; GO:0012506 vesicle membrane; GO:0016020 membrane; GO:0030141 secretory granule; GO:0030659 cytoplasmic vesicle membrane; GO:0030667 secretory gran…	GO:0003824 catalytic activity; GO:0008080 N-acetyltransferase activity; GO:0015019 heparan-alpha-glucosaminide N-acetyltransferase activity; GO:0016407 acetyltransferase activity; GO:0016410 N-acyltransferase activity; GO:0016740 transferase activity; GO:0016746 transferase activity, transferring acyl groups; GO:0016747 transferase activity, transferring acyl groups other than amino-acyl groups;			S	KOG4683	Uncharacterized conserved protein
O55135	Eukaryotic translation initiation factor 6 OS=Mus musculus OX=10090 GN=Eif6 PE=1 SV=2	Eif6	2.1467	7.25269e-08	Up	26.511	54.7	7	7	0.713239	0.683792	0.667579	0.720511	0.721465	0.694879	0.663048	0.748766	1.48426	1.39938	1.47758	1.53528	1.49022	extracellular	K03264	EIF6; translation initiation factor 6	mmu03008 Ribosome biogenesis in eukaryotes	GO:0000054 ribosomal subunit export from nucleus; GO:0000460 maturation of 5.8S rRNA; GO:0000470 maturation of LSU-rRNA; GO:0002682 regulation of immune system process; GO:0006109 regulation of carbohydrate metabolic process; GO:0006110 regulation of glycolytic process; GO:0006139 nucleobase-containing compound metabolic process; GO:0006140 regulation of nucleotide metabolic process; GO:0006364 r…	GO:0005622 intracellular; GO:0005623 cell; GO:0005634 nucleus; GO:0005638 lamin filament; GO:0005652 nuclear lamina; GO:0005654 nucleoplasm; GO:0005730 nucleolus; GO:0005737 cytoplasm; GO:0005829 cytosol; GO:0005856 cytoskeleton; GO:0005882 intermediate filament; GO:0030684 preribosome; GO:0030687 preribosome, large subunit precursor; GO:0031974 membrane-enclosed lumen; GO:0031981 nuclear lumen; …	GO:0005488 binding; GO:0043021 ribonucleoprotein complex binding; GO:0043022 ribosome binding; GO:0043023 ribosomal large subunit binding; GO:0044877 protein-containing complex binding;			J	KOG3185	Translation initiation factor 6 (eIF-6)
Q80TV8	CLIP-associating protein 1 OS=Mus musculus OX=10090 GN=Clasp1 PE=1 SV=2	Clasp1	2.145	1.03348e-05	Up	169.23	8.9	9	7	0.608738	0.631861	0.563748	0.950017	1.05443	0.963051	0.886573	0.891025	1.37503	1.42644	1.21356	1.27456	1.16096	nucleus	K16578			GO:0000226 microtubule cytoskeleton organization; GO:0000278 mitotic cell cycle; GO:0000280 nuclear division; GO:0001578 microtubule bundle formation; GO:0001952 regulation of cell-matrix adhesion; GO:0006810 transport; GO:0006903 vesicle targeting; GO:0006996 organelle organization; GO:0007010 cytoskeleton organization; GO:0007017 microtubule-based process; GO:0007020 microtubule nucleation; GO:…	GO:0000775 chromosome, centromeric region; GO:0000776 kinetochore; GO:0005622 intracellular; GO:0005623 cell; GO:0005694 chromosome; GO:0005737 cytoplasm; GO:0005794 Golgi apparatus; GO:0005813 centrosome; GO:0005815 microtubule organizing center; GO:0005819 spindle; GO:0005856 cytoskeleton; GO:0005874 microtubule; GO:0005876 spindle microtubule; GO:0005881 cytoplasmic microtubule; GO:0005938 cel…	GO:0002162 dystroglycan binding; GO:0005488 binding; GO:0005515 protein binding; GO:0008017 microtubule binding; GO:0008092 cytoskeletal protein binding; GO:0015631 tubulin binding; GO:0043515 kinetochore binding; GO:0044877 protein-containing complex binding; GO:0051010 microtubule plus-end binding;			Z	KOG2956	CLIP-associating protein
Q3TJD7	PDZ and LIM domain protein 7 OS=Mus musculus OX=10090 GN=Pdlim7 PE=1 SV=1	Pdlim7	2.139	4.99588e-07	Up	50.118	43.3	14	14	0.590479	0.610669	0.640996	0.890791	0.922827	0.945043	0.900215	0.931691	1.256	1.24613	1.3194	1.34688	1.39888	nucleus	K19867			GO:0000902 cell morphogenesis; GO:0000904 cell morphogenesis involved in differentiation; GO:0006810 transport; GO:0006897 endocytosis; GO:0006898 receptor-mediated endocytosis; GO:0006928 movement of cell or subcellular component; GO:0006935 chemotaxis; GO:0006996 organelle organization; GO:0007010 cytoskeleton organization; GO:0007275 multicellular organism development; GO:0007399 nervous syste…	GO:0001725 stress fiber; GO:0001726 ruffle; GO:0005622 intracellular; GO:0005623 cell; GO:0005634 nucleus; GO:0005737 cytoplasm; GO:0005829 cytosol; GO:0005856 cytoskeleton; GO:0005911 cell-cell junction; GO:0005912 adherens junction; GO:0005925 focal adhesion; GO:0015629 actin cytoskeleton; GO:0030054 cell junction; GO:0030055 cell-substrate junction; GO:0031252 cell leading edge; GO:0032432 act…		PF00595; PF00412	PDZ domain (Also known as DHR or GLGF); LIM domain	TZ	KOG1703	Adaptor protein Enigma and related PDZ-LIM proteins
Q7TPV4	Myb-binding protein 1A OS=Mus musculus OX=10090 GN=Mybbp1a PE=1 SV=2	Mybbp1a	2.1377	1.27111e-09	Up	152.04	35.9	37	37	0.652752	0.67989	0.666789	0.796384	0.745878	0.775248	0.78355	0.775814	1.44245	1.43794	1.40071	1.44037	1.40221	nucleus	K02331			GO:0006091 generation of precursor metabolites and energy; GO:0006355 regulation of transcription, DNA-templated; GO:0006915 apoptotic process; GO:0006950 response to stress; GO:0007154 cell communication; GO:0007165 signal transduction; GO:0007623 circadian rhythm; GO:0008152 metabolic process; GO:0008219 cell death; GO:0009267 cellular response to starvation; GO:0009605 response to external sti…	GO:0005622 intracellular; GO:0005623 cell; GO:0005634 nucleus; GO:0005654 nucleoplasm; GO:0005730 nucleolus; GO:0005737 cytoplasm; GO:0031074 nucleocytoplasmic transport complex; GO:0031974 membrane-enclosed lumen; GO:0031981 nuclear lumen; GO:0032991 protein-containing complex; GO:0042564 NLS-dependent protein nuclear import complex; GO:0043226 organelle; GO:0043227 membrane-bounded organelle; G…	GO:0000976 transcription regulatory region sequence-specific DNA binding; GO:0000977 RNA polymerase II transcription regulatory region sequence-specific DNA binding; GO:0000978 RNA polymerase II cis-regulatory region sequence-specific DNA binding; GO:0000987 cis-regulatory region sequence-specific DNA binding; GO:0001067 regulatory region nucleic acid binding; GO:0003676 nucleic acid binding; GO:…			K	KOG1926	Predicted regulator of rRNA gene transcription (MYB-binding protein)
B2RXR6	Serine/threonine-protein phosphatase 6 regulatory ankyrin repeat subunit B OS=Mus musculus OX=10090 GN=Ankrd44 PE=1 SV=1	Ankrd44	2.1346	4.49042e-05	Up	107.38	13.3	9	9	0.487252	0.561624	0.605821	1.09821	1.10217	1.10714	1.06869	1.08214	1.17197	1.2166	1.03638	1.12773	1.33426	cytoplasm	K15503								M	KOG4177	Ankyrin
Q62351	Transferrin receptor protein 1 OS=Mus musculus OX=10090 GN=Tfrc PE=1 SV=1	Tfrc	2.1309	2.77901e-07	Up	85.73	33	21	21	0.746375	0.671099	0.707991	0.691292	0.682011	0.647528	0.657765	0.647413	1.55205	1.54785	1.47735	1.43465	1.53663	plasma membrane	K06503	TFRC; transferrin receptor	mmu04216 Ferroptosis; mmu04640 Hematopoietic cell lineage; mmu04066 HIF-1 signaling pathway; mmu04145 Phagosome; mmu04144 Endocytosis	GO:0000018 regulation of DNA recombination; GO:0000041 transition metal ion transport; GO:0001101 response to acid chemical; GO:0001666 response to hypoxia; GO:0002376 immune system process; GO:0002520 immune system development; GO:0002521 leukocyte differentiation; GO:0002526 acute inflammatory response; GO:0002573 myeloid leukocyte differentiation; GO:0002637 regulation of immunoglobulin produc…	GO:0005576 extracellular region; GO:0005615 extracellular space; GO:0005622 intracellular; GO:0005623 cell; GO:0005634 nucleus; GO:0005737 cytoplasm; GO:0005739 mitochondrion; GO:0005768 endosome; GO:0005769 early endosome; GO:0005886 plasma membrane; GO:0005887 integral component of plasma membrane; GO:0005905 clathrin-coated pit; GO:0009897 external side of plasma membrane; GO:0009986 cell surf…	GO:0003676 nucleic acid binding; GO:0003723 RNA binding; GO:0003725 double-stranded RNA binding; GO:0004998 transferrin receptor activity; GO:0005215 transporter activity; GO:0005381 iron ion transmembrane transporter activity; GO:0005488 binding; GO:0005515 protein binding; GO:0008324 cation transmembrane transporter activity; GO:0015075 ion transmembrane transporter activity; GO:0015318 inorgan…	PF04253	Transferrin receptor-like dimerisation domain	OP	KOG2195	Transferrin receptor and related proteins containing the protease-associated (PA) domain
Q8R143	Pituitary tumor-transforming gene 1 protein-interacting protein OS=Mus musculus OX=10090 GN=Pttg1ip PE=1 SV=1	Pttg1ip	2.1307	8.95081e-06	Up	19.965	10.3	3	3	0.79461	0.689696	0.643726	0.657238	0.676821	0.677849	0.658609	0.644607	1.42125	1.53409	1.62212	1.44906	1.53032	extracellular				GO:0006606 protein import into nucleus; GO:0006810 transport; GO:0006886 intracellular protein transport; GO:0006913 nucleocytoplasmic transport; GO:0008104 protein localization; GO:0009893 positive regulation of metabolic process; GO:0009894 regulation of catabolic process; GO:0009896 positive regulation of catabolic process; GO:0009966 regulation of signal transduction; GO:0009968 negative regu…	GO:0005622 intracellular; GO:0005623 cell; GO:0005634 nucleus; GO:0005654 nucleoplasm; GO:0005737 cytoplasm; GO:0031974 membrane-enclosed lumen; GO:0031981 nuclear lumen; GO:0043226 organelle; GO:0043227 membrane-bounded organelle; GO:0043229 intracellular organelle; GO:0043231 intracellular membrane-bounded organelle; GO:0043233 organelle lumen; GO:0070013 intracellular organelle lumen;	GO:0002039 p53 binding; GO:0005488 binding; GO:0005515 protein binding;
Q8R1N4	NudC domain-containing protein 3 OS=Mus musculus OX=10090 GN=Nudcd3 PE=1 SV=3	Nudcd3	2.1287	0.00245357	Up	40.89	18.7	6	6	0.776171	0.615189	0.400447	1.19947	0.609134	1.04859	0.97887	1.01497	1.22027	1.39772	1.051	1.34222	1.34596	cytoplasm				GO:0006457 protein folding; GO:0006996 organelle organization; GO:0008104 protein localization; GO:0009987 cellular process; GO:0016043 cellular component organization; GO:0022607 cellular component assembly; GO:0030030 cell projection organization; GO:0030031 cell projection assembly; GO:0032502 developmental process; GO:0033036 macromolecule localization; GO:0033365 protein localization to orga…	GO:0005622 intracellular; GO:0005623 cell; GO:0005737 cytoplasm; GO:0005856 cytoskeleton; GO:0005868 cytoplasmic dynein complex; GO:0005875 microtubule associated complex; GO:0015630 microtubule cytoskeleton; GO:0030286 dynein complex; GO:0032991 protein-containing complex; GO:0043226 organelle; GO:0043228 non-membrane-bounded organelle; GO:0043229 intracellular organelle; GO:0043232 intracellula…	GO:0005488 binding; GO:0005515 protein binding; GO:0051082 unfolded protein binding;	PF04969	CS domain	T	KOG2265	Nuclear distribution protein NUDC
P46935	E3 ubiquitin-protein ligase NEDD4 OS=Mus musculus OX=10090 GN=Nedd4 PE=1 SV=3	Nedd4	2.123	1.79314e-09	Up	102.71	37.9	28	26	0.672707	0.670107	0.681806	0.763887	0.76319	0.758594	0.767879	0.757991	1.44839	1.44444	1.41668	1.38952	1.46482	cytoplasm	K10591	NEDD4; E3 ubiquitin-protein ligase NEDD4 [EC:2.3.2.26]	mmu04120 Ubiquitin mediated proteolysis; mmu04144 Endocytosis; mmu04530 Tight junction; mmu05169 Epstein-Barr virus infection	GO:0000122 negative regulation of transcription by RNA polymerase II; GO:0000209 protein polyubiquitination; GO:0001568 blood vessel development; GO:0001775 cell activation; GO:0001944 vasculature development; GO:0002028 regulation of sodium ion transport; GO:0002250 adaptive immune response; GO:0002376 immune system process; GO:0003007 heart morphogenesis; GO:0003151 outflow tract morphogenesis;…	GO:0000151 ubiquitin ligase complex; GO:0000785 chromatin; GO:0005622 intracellular; GO:0005623 cell; GO:0005694 chromosome; GO:0005737 cytoplasm; GO:0005794 Golgi apparatus; GO:0005829 cytosol; GO:0005886 plasma membrane; GO:0005902 microvillus; GO:0005938 cell cortex; GO:0012505 endomembrane system; GO:0016020 membrane; GO:0016327 apicolateral plasma membrane; GO:0030425 dendrite; GO:0032991 pr…	GO:0001664 G protein-coupled receptor binding; GO:0003824 catalytic activity; GO:0004842 ubiquitin-protein transferase activity; GO:0005102 signaling receptor binding; GO:0005488 binding; GO:0005515 protein binding; GO:0008022 protein C-terminus binding; GO:0008200 ion channel inhibitor activity; GO:0016247 channel regulator activity; GO:0016248 channel inhibitor activity; GO:0016740 transferase …	PF00168; PF00397; PF00632	C2 domain; WW domain; HECT-domain (ubiquitin-transferase)	O	KOG0940	Ubiquitin protein ligase RSP5/NEDD4
Q08024	Core-binding factor subunit beta OS=Mus musculus OX=10090 GN=Cbfb PE=1 SV=1	Cbfb	2.1206	0.0076537	Up	22.03	23.5	4	4	0.513343	0.534838		1.1585	1.152	1.10283	1.20238	0.779219	1.03947	0.790481	1.16081	1.48487	1.08125	nucleus				GO:0000122 negative regulation of transcription by RNA polymerase II; GO:0000209 protein polyubiquitination; GO:0001503 ossification; GO:0001649 osteoblast differentiation; GO:0001775 cell activation; GO:0001959 regulation of cytokine-mediated signaling pathway; GO:0002376 immune system process; GO:0002520 immune system development; GO:0002521 leukocyte differentiation; GO:0002682 regulation of i…	GO:0005622 intracellular; GO:0005623 cell; GO:0005634 nucleus; GO:0005654 nucleoplasm; GO:0005667 transcription regulator complex; GO:0016513 core-binding factor complex; GO:0031974 membrane-enclosed lumen; GO:0031981 nuclear lumen; GO:0032991 protein-containing complex; GO:0043226 organelle; GO:0043227 membrane-bounded organelle; GO:0043229 intracellular organelle; GO:0043231 intracellular membr…	GO:0000981 DNA-binding transcription factor activity, RNA polymerase II-specific; GO:0003676 nucleic acid binding; GO:0003677 DNA binding; GO:0003700 DNA-binding transcription factor activity; GO:0005488 binding; GO:0097159 organic cyclic compound binding; GO:0140110 transcription regulator activity; GO:1901363 heterocyclic compound binding;			K	KOG4785	Transcription factor CBF, beta subunit
Q6PB44	Tyrosine-protein phosphatase non-receptor type 23 OS=Mus musculus OX=10090 GN=Ptpn23 PE=1 SV=2	Ptpn23	2.1167	8.52287e-08	Up	185.21	35.1	40	40	0.709262	0.659334	0.658796	0.780156	0.779646	0.768356	0.775924	0.716361	1.4132	1.37902	1.44642	1.48985	1.42368	cytoplasm,nucleus	K18040			GO:0002791 regulation of peptide secretion; GO:0002793 positive regulation of peptide secretion; GO:0006464 cellular protein modification process; GO:0006470 protein dephosphorylation; GO:0006508 proteolysis; GO:0006511 ubiquitin-dependent protein catabolic process; GO:0006793 phosphorus metabolic process; GO:0006796 phosphate-containing compound metabolic process; GO:0006807 nitrogen compound me…	GO:0005622 intracellular; GO:0005623 cell; GO:0005634 nucleus; GO:0005654 nucleoplasm; GO:0005737 cytoplasm; GO:0005768 endosome; GO:0005769 early endosome; GO:0005815 microtubule organizing center; GO:0005856 cytoskeleton; GO:0005929 cilium; GO:0012505 endomembrane system; GO:0015630 microtubule cytoskeleton; GO:0016604 nuclear body; GO:0031410 cytoplasmic vesicle; GO:0031974 membrane-enclosed l…	GO:0003824 catalytic activity; GO:0004721 phosphoprotein phosphatase activity; GO:0004725 protein tyrosine phosphatase activity; GO:0005488 binding; GO:0005515 protein binding; GO:0016787 hydrolase activity; GO:0016788 hydrolase activity, acting on ester bonds; GO:0016791 phosphatase activity; GO:0019899 enzyme binding; GO:0019900 kinase binding; GO:0019901 protein kinase binding; GO:0042578 phos…	PF03097; PF13949; PF00102	BRO1-like domain; ALIX V-shaped domain binding to HIV ; Protein-tyrosine phosphatase	T	KOG2220	Predicted signal transduction protein
Q61207	Prosaposin OS=Mus musculus OX=10090 GN=Psap PE=1 SV=2	Psap	2.1106	6.27408e-07	Up	61.422	24.8	12	12	0.586068	0.564879	0.648697	0.958643	0.982832	0.992522	0.963151	0.972645	1.30706	1.2991	1.23036	1.23558	1.25846	extracellular	K12382	PSAP; saposin	mmu04142 Lysosome; mmu00600 Sphingolipid metabolism	GO:0000003 reproduction; GO:0001655 urogenital system development; GO:0001775 cell activation; GO:0001932 regulation of protein phosphorylation; GO:0001934 positive regulation of protein phosphorylation; GO:0002252 immune effector process; GO:0002263 cell activation involved in immune response; GO:0002274 myeloid leukocyte activation; GO:0002275 myeloid cell activation involved in immune response…	GO:0000323 lytic vacuole; GO:0005576 extracellular region; GO:0005615 extracellular space; GO:0005622 intracellular; GO:0005623 cell; GO:0005737 cytoplasm; GO:0005764 lysosome; GO:0005765 lysosomal membrane; GO:0005766 primary lysosome; GO:0005773 vacuole; GO:0005774 vacuolar membrane; GO:0005775 vacuolar lumen; GO:0005886 plasma membrane; GO:0012505 endomembrane system; GO:0012506 vesicle membra…	GO:0001664 G protein-coupled receptor binding; GO:0003824 catalytic activity; GO:0004553 hydrolase activity, hydrolyzing O-glycosyl compounds; GO:0004565 beta-galactosidase activity; GO:0005102 signaling receptor binding; GO:0005488 binding; GO:0005515 protein binding; GO:0005543 phospholipid binding; GO:0008047 enzyme activator activity; GO:0008289 lipid binding; GO:0015925 galactosidase activit…	PF05184	Saposin-like type B, region 1	GI	KOG1340	Prosaposin
Q05186	Reticulocalbin-1 OS=Mus musculus OX=10090 GN=Rcn1 PE=1 SV=1	Rcn1	2.1086	1.26187e-07	Up	38.113	44.3	9	9	0.561344	0.508146	0.55045	1.11508	1.13249	1.20848	1.08552	1.14545	1.12161	1.13723	1.18101	1.11026	1.14292	endoplasmic reticulum	K23898			GO:0001654 eye development; GO:0001701 in utero embryonic development; GO:0006464 cellular protein modification process; GO:0006807 nitrogen compound metabolic process; GO:0007275 multicellular organism development; GO:0007423 sensory organ development; GO:0008152 metabolic process; GO:0009790 embryo development; GO:0009792 embryo development ending in birth or egg hatching; GO:0009987 cellular p…	GO:0005622 intracellular; GO:0005623 cell; GO:0005737 cytoplasm; GO:0005783 endoplasmic reticulum; GO:0005788 endoplasmic reticulum lumen; GO:0012505 endomembrane system; GO:0031974 membrane-enclosed lumen; GO:0043226 organelle; GO:0043227 membrane-bounded organelle; GO:0043229 intracellular organelle; GO:0043231 intracellular membrane-bounded organelle; GO:0043233 organelle lumen; GO:0070013 int…	GO:0005488 binding; GO:0005509 calcium ion binding; GO:0043167 ion binding; GO:0043169 cation binding; GO:0046872 metal ion binding;	PF13202	EF hand	TU	KOG4223	Reticulocalbin, calumenin, DNA supercoiling factor, and related Ca2+-binding proteins of the CREC family (EF-Hand protein superfamily)
Q64378	Peptidyl-prolyl cis-trans isomerase FKBP5 OS=Mus musculus OX=10090 GN=Fkbp5 PE=1 SV=1	Fkbp5	2.1067	6.4636e-09	Up	50.966	44.5	19	19	0.68235	0.706378	0.701548	0.736739	0.695769	0.708555	0.701905	0.727595	1.48967	1.47835	1.45709	1.41398	1.50008	cytoplasm	K09571	FKBP4_5; FK506-binding protein 4/5 [EC:5.2.1.8]	mmu04915 Estrogen signaling pathway	GO:0000413 protein peptidyl-prolyl isomerization; GO:0006457 protein folding; GO:0006464 cellular protein modification process; GO:0006807 nitrogen compound metabolic process; GO:0008152 metabolic process; GO:0009605 response to external stimulus; GO:0009607 response to biotic stimulus; GO:0009617 response to bacterium; GO:0009987 cellular process; GO:0018193 peptidyl-amino acid modification; GO:…	GO:0005622 intracellular; GO:0005623 cell; GO:0005634 nucleus; GO:0005654 nucleoplasm; GO:0005737 cytoplasm; GO:0031974 membrane-enclosed lumen; GO:0031981 nuclear lumen; GO:0043226 organelle; GO:0043227 membrane-bounded organelle; GO:0043229 intracellular organelle; GO:0043231 intracellular membrane-bounded organelle; GO:0043233 organelle lumen; GO:0070013 intracellular organelle lumen;	GO:0003755 peptidyl-prolyl cis-trans isomerase activity; GO:0003824 catalytic activity; GO:0005488 binding; GO:0005515 protein binding; GO:0005527 macrolide binding; GO:0005528 FK506 binding; GO:0008144 drug binding; GO:0016853 isomerase activity; GO:0016859 cis-trans isomerase activity; GO:0031072 heat shock protein binding; GO:0097159 organic cyclic compound binding; GO:0140096 catalytic activi…	PF00254	FKBP-type peptidyl-prolyl cis-trans isomerase	O	KOG0543	FKBP-type peptidyl-prolyl cis-trans isomerase
Q99ME9	Nucleolar GTP-binding protein 1 OS=Mus musculus OX=10090 GN=Gtpbp4 PE=1 SV=3	Gtpbp4	2.1023	0.000458831	Up	74.112	16.7	8	8	0.685449	0.529617	0.872457	0.461911	0.724094		0.797394	0.614747	1.4364	1.50711	1.49602	1.54037	1.33443	cytoplasm	K06943	NOG1; nucleolar GTP-binding protein	mmu03008 Ribosome biogenesis in eukaryotes	GO:0000079 regulation of cyclin-dependent protein serine/threonine kinase activity; GO:0000463 maturation of LSU-rRNA from tricistronic rRNA transcript (SSU-rRNA, 5.8S rRNA, LSU-rRNA); GO:0000470 maturation of LSU-rRNA; GO:0001932 regulation of protein phosphorylation; GO:0006139 nucleobase-containing compound metabolic process; GO:0006275 regulation of DNA replication; GO:0006364 rRNA processing…	GO:0005622 intracellular; GO:0005623 cell; GO:0005634 nucleus; GO:0005635 nuclear envelope; GO:0005730 nucleolus; GO:0005737 cytoplasm; GO:0005794 Golgi apparatus; GO:0005829 cytosol; GO:0012505 endomembrane system; GO:0016020 membrane; GO:0031090 organelle membrane; GO:0031965 nuclear membrane; GO:0031967 organelle envelope; GO:0031974 membrane-enclosed lumen; GO:0031975 envelope; GO:0031981 nuc…	GO:0000166 nucleotide binding; GO:0001882 nucleoside binding; GO:0001883 purine nucleoside binding; GO:0003824 catalytic activity; GO:0003924 GTPase activity; GO:0005488 binding; GO:0005525 GTP binding; GO:0016462 pyrophosphatase activity; GO:0016787 hydrolase activity; GO:0016817 hydrolase activity, acting on acid anhydrides; GO:0016818 hydrolase activity, acting on acid anhydrides, in phosphoru…	PF08155	NOGCT (NUC087) domain	K	KOG1490	GTP-binding protein CRFG/NOG1 (ODN superfamily)
Q9DBZ1	Inhibitor of nuclear factor kappa-B kinase-interacting protein OS=Mus musculus OX=10090 GN=Ikbip PE=1 SV=2	Ikbip	2.1002	0.00970307	Up	42.532	10.7	3	3	0.695326		0.517968	0.86089	1.19129	0.749123	0.926377	0.962621	1.09646	1.11915		1.60598	1.27482	cytoplasm,nucleus				GO:0009314 response to radiation; GO:0009628 response to abiotic stimulus; GO:0010165 response to X-ray; GO:0010212 response to ionizing radiation; GO:0050896 response to stimulus;	GO:0005622 intracellular; GO:0005623 cell; GO:0005737 cytoplasm; GO:0005783 endoplasmic reticulum; GO:0012505 endomembrane system; GO:0043226 organelle; GO:0043227 membrane-bounded organelle; GO:0043229 intracellular organelle; GO:0043231 intracellular membrane-bounded organelle;
Q9ES00	Ubiquitin conjugation factor E4 B OS=Mus musculus OX=10090 GN=Ube4b PE=1 SV=3	Ube4b	2.0992	2.41562e-06	Up	133.32	25.3	19	19	0.541623	0.619003	0.63757	1.01433	0.970397	0.986503	0.973799	0.965511	1.1941	1.26996	1.29421	1.30713	1.22585	cytoplasm,nucleus	K10597	UBE4B; ubiquitin conjugation factor E4 B [EC:2.3.2.27]	mmu04120 Ubiquitin mediated proteolysis; mmu04141 Protein processing in endoplasmic reticulum	GO:0000209 protein polyubiquitination; GO:0003007 heart morphogenesis; GO:0003205 cardiac chamber development; GO:0003206 cardiac chamber morphogenesis; GO:0003208 cardiac ventricle morphogenesis; GO:0003222 ventricular trabecula myocardium morphogenesis; GO:0003229 ventricular cardiac muscle tissue development; GO:0003231 cardiac ventricle development; GO:0006457 protein folding; GO:0006464 cell…	GO:0000151 ubiquitin ligase complex; GO:0005622 intracellular; GO:0005623 cell; GO:0005634 nucleus; GO:0005737 cytoplasm; GO:0032991 protein-containing complex; GO:0043226 organelle; GO:0043227 membrane-bounded organelle; GO:0043229 intracellular organelle; GO:0043231 intracellular membrane-bounded organelle; GO:1902494 catalytic complex; GO:1990234 transferase complex;	GO:0000166 nucleotide binding; GO:0003824 catalytic activity; GO:0004842 ubiquitin-protein transferase activity; GO:0005488 binding; GO:0005515 protein binding; GO:0005524 ATP binding; GO:0008144 drug binding; GO:0016740 transferase activity; GO:0017076 purine nucleotide binding; GO:0019787 ubiquitin-like protein transferase activity; GO:0019899 enzyme binding; GO:0030554 adenyl nucleotide bindin…	PF04564	U-box domain	O	KOG2042	Ubiquitin fusion degradation protein-2
Q9WVJ9	EGF-containing fibulin-like extracellular matrix protein 2 OS=Mus musculus OX=10090 GN=Efemp2 PE=1 SV=1	Efemp2	2.0981	0.00503426	Up	49.425	14.2	4	4	0.644565	0.300922	0.638196	1.22148	1.19559	0.980079	1.08373	1.39761	1.11565	1.09429	1.09022	1.16399	1.07367	extracellular	K19866				GO:0005576 extracellular region; GO:0005604 basement membrane; GO:0031012 extracellular matrix; GO:0062023 collagen-containing extracellular matrix;	GO:0005198 structural molecule activity; GO:0005201 extracellular matrix structural constituent;	PF07645; PF12662	Calcium-binding EGF domain; Complement Clr-like EGF-like	T	KOG1217	Fibrillins and related proteins containing Ca2+-binding EGF-like domains
Q9EPL8	Importin-7 OS=Mus musculus OX=10090 GN=Ipo7 PE=1 SV=2	Ipo7	2.096	1.3203e-09	Up	119.49	30.9	25	24	0.674073	0.691548	0.680973	0.751778	0.778411	0.773446	0.745265	0.755003	1.46261	1.44449	1.4185	1.43004	1.39387	cytoplasm	K20223			GO:0000079 regulation of cyclin-dependent protein serine/threonine kinase activity; GO:0001932 regulation of protein phosphorylation; GO:0001933 negative regulation of protein phosphorylation; GO:0002376 immune system process; GO:0006469 negative regulation of protein kinase activity; GO:0006606 protein import into nucleus; GO:0006810 transport; GO:0006886 intracellular protein transport; GO:0006…	GO:0005622 intracellular; GO:0005623 cell; GO:0005634 nucleus; GO:0005635 nuclear envelope; GO:0005643 nuclear pore; GO:0005654 nucleoplasm; GO:0005737 cytoplasm; GO:0005829 cytosol; GO:0012505 endomembrane system; GO:0031967 organelle envelope; GO:0031974 membrane-enclosed lumen; GO:0031975 envelope; GO:0031981 nuclear lumen; GO:0032991 protein-containing complex; GO:0043226 organelle; GO:004322…	GO:0005215 transporter activity; GO:0005488 binding; GO:0005515 protein binding; GO:0008536 Ran GTPase binding; GO:0017016 Ras GTPase binding; GO:0019899 enzyme binding; GO:0030234 enzyme regulator activity; GO:0030695 GTPase regulator activity; GO:0031267 small GTPase binding; GO:0042393 histone binding; GO:0046332 SMAD binding; GO:0051020 GTPase binding; GO:0060589 nucleoside-triphosphatase reg…			UY	KOG1991	Nuclear transport receptor RANBP7/RANBP8 (importin beta superfamily)
Q8CAS9	Protein mono-ADP-ribosyltransferase PARP9 OS=Mus musculus OX=10090 GN=Parp9 PE=1 SV=2	Parp9	2.0941	0.0115375	Up	96.658	6.5	4	4		0.77437	0.477841	0.753139	0.76276	0.776821	1.03852	0.860955	1.08075	1.69444	1.2271	1.46012	1.09319	nucleus	K15260			GO:0000122 negative regulation of transcription by RNA polymerase II; GO:0001932 regulation of protein phosphorylation; GO:0001934 positive regulation of protein phosphorylation; GO:0001959 regulation of cytokine-mediated signaling pathway; GO:0001961 positive regulation of cytokine-mediated signaling pathway; GO:0002230 positive regulation of defense response to virus by host; GO:0002682 regulat…	GO:0005622 intracellular; GO:0005623 cell; GO:0005634 nucleus; GO:0005654 nucleoplasm; GO:0005694 chromosome; GO:0005737 cytoplasm; GO:0005739 mitochondrion; GO:0005829 cytosol; GO:0031974 membrane-enclosed lumen; GO:0031981 nuclear lumen; GO:0032991 protein-containing complex; GO:0043226 organelle; GO:0043227 membrane-bounded organelle; GO:0043228 non-membrane-bounded organelle; GO:0043229 intra…	GO:0003824 catalytic activity; GO:0003950 NAD+ ADP-ribosyltransferase activity; GO:0004857 enzyme inhibitor activity; GO:0005488 binding; GO:0005515 protein binding; GO:0016740 transferase activity; GO:0016757 transferase activity, transferring glycosyl groups; GO:0016763 transferase activity, transferring pentosyl groups; GO:0019899 enzyme binding; GO:0030234 enzyme regulator activity; GO:004239…	PF01661	Macro domain	BK	KOG2633	Hismacro and SEC14 domain-containing proteins
O35309	N-myc-interactor OS=Mus musculus OX=10090 GN=Nmi PE=1 SV=1	Nmi	2.0884	6.41673e-08	Up	35.235	41.1	8	8	0.603383	0.637956	0.628701	0.904812	0.895601	0.934814	0.970695	0.915164	1.25265	1.26528	1.32028	1.31239	1.35827	cytoplasm				GO:0001817 regulation of cytokine production; GO:0001818 negative regulation of cytokine production; GO:0002682 regulation of immune system process; GO:0002683 negative regulation of immune system process; GO:0006139 nucleobase-containing compound metabolic process; GO:0006351 transcription, DNA-templated; GO:0006366 transcription by RNA polymerase II; GO:0006725 cellular aromatic compound metabo…	GO:0005622 intracellular; GO:0005623 cell; GO:0005634 nucleus; GO:0005654 nucleoplasm; GO:0005737 cytoplasm; GO:0005829 cytosol; GO:0031974 membrane-enclosed lumen; GO:0031981 nuclear lumen; GO:0043226 organelle; GO:0043227 membrane-bounded organelle; GO:0043229 intracellular organelle; GO:0043231 intracellular membrane-bounded organelle; GO:0043233 organelle lumen; GO:0070013 intracellular organ…	GO:0003712 transcription coregulator activity; GO:0005488 binding; GO:0005515 protein binding; GO:0042802 identical protein binding; GO:0140110 transcription regulator activity;	PF07292	Nmi/IFP 35 domain (NID)
Q03734	Serine protease inhibitor A3M OS=Mus musculus OX=10090 GN=Serpina3m PE=1 SV=2	Serpina3m	2.0875	9.78838e-09	Up	47.064	46.7	14	7	0.723131	0.750941	0.715984	0.646527	0.626026	0.62034	0.643331	0.654059	1.51685	1.50756	1.58349	1.51363	1.49814	endoplasmic reticulum	K04525			GO:0001775 cell activation; GO:0001894 tissue homeostasis; GO:0002252 immune effector process; GO:0002263 cell activation involved in immune response; GO:0002274 myeloid leukocyte activation; GO:0002275 myeloid cell activation involved in immune response; GO:0002283 neutrophil activation involved in immune response; GO:0002366 leukocyte activation involved in immune response; GO:0002376 immune sy…	GO:0000323 lytic vacuole; GO:0005576 extracellular region; GO:0005615 extracellular space; GO:0005622 intracellular; GO:0005623 cell; GO:0005634 nucleus; GO:0005737 cytoplasm; GO:0005764 lysosome; GO:0005766 primary lysosome; GO:0005773 vacuole; GO:0005775 vacuolar lumen; GO:0012505 endomembrane system; GO:0030141 secretory granule; GO:0031091 platelet alpha granule; GO:0031093 platelet alpha gra…	GO:0003676 nucleic acid binding; GO:0003677 DNA binding; GO:0004857 enzyme inhibitor activity; GO:0004866 endopeptidase inhibitor activity; GO:0004867 serine-type endopeptidase inhibitor activity; GO:0004869 cysteine-type endopeptidase inhibitor activity; GO:0005488 binding; GO:0030234 enzyme regulator activity; GO:0030414 peptidase inhibitor activity; GO:0061134 peptidase regulator activity; GO:…	PF00079	Serpin (serine protease inhibitor)	V	KOG2392	Serpin
Q3UZ39	Leucine-rich repeat flightless-interacting protein 1 OS=Mus musculus OX=10090 GN=Lrrfip1 PE=1 SV=2	Lrrfip1	2.0863	1.70765e-07	Up	79.248	36.2	16	15	0.678845	0.66341	0.639898	0.778852	0.857012	0.828936	0.833239	0.827525	1.47912	1.3678	1.33923	1.34918	1.35694	nucleus				GO:0000122 negative regulation of transcription by RNA polymerase II; GO:0001817 regulation of cytokine production; GO:0001819 positive regulation of cytokine production; GO:0006355 regulation of transcription, DNA-templated; GO:0006357 regulation of transcription by RNA polymerase II; GO:0009889 regulation of biosynthetic process; GO:0009890 negative regulation of biosynthetic process; GO:000989…	GO:0005622 intracellular; GO:0005623 cell; GO:0005634 nucleus; GO:0005737 cytoplasm; GO:0005829 cytosol; GO:0005856 cytoskeleton; GO:0005886 plasma membrane; GO:0016020 membrane; GO:0043226 organelle; GO:0043227 membrane-bounded organelle; GO:0043228 non-membrane-bounded organelle; GO:0043229 intracellular organelle; GO:0043231 intracellular membrane-bounded organelle; GO:0043232 intracellular no…	GO:0000976 transcription regulatory region sequence-specific DNA binding; GO:0000977 RNA polymerase II transcription regulatory region sequence-specific DNA binding; GO:0000978 RNA polymerase II cis-regulatory region sequence-specific DNA binding; GO:0000981 DNA-binding transcription factor activity, RNA polymerase II-specific; GO:0000987 cis-regulatory region sequence-specific DNA binding; GO:00…			K	KOG2010	Double stranded RNA binding protein
Q6PIP5	NudC domain-containing protein 1 OS=Mus musculus OX=10090 GN=Nudcd1 PE=1 SV=2	Nudcd1	2.0794	1.348e-05	Up	66.704	26.1	10	10	0.557584	0.636139	0.608343	1.11481	1.01387	0.935605	0.905811	0.982621	1.20622	1.22555	1.11502	1.31911	1.37932	cytoplasm					GO:0005622 intracellular; GO:0005623 cell; GO:0005634 nucleus; GO:0005654 nucleoplasm; GO:0005737 cytoplasm; GO:0005829 cytosol; GO:0031974 membrane-enclosed lumen; GO:0031981 nuclear lumen; GO:0043226 organelle; GO:0043227 membrane-bounded organelle; GO:0043229 intracellular organelle; GO:0043231 intracellular membrane-bounded organelle; GO:0043233 organelle lumen; GO:0070013 intracellular organ…		PF04969	CS domain	S	KOG4379	Uncharacterized conserved protein (tumor antigen CML66 in humans)
Q91VW3	SH3 domain-binding glutamic acid-rich-like protein 3 OS=Mus musculus OX=10090 GN=Sh3bgrl3 PE=1 SV=1	Sh3bgrl3	2.0766	5.0508e-07	Up	10.477	31.2	3	3	0.628247	0.67658	0.682179	0.827224	0.810598	0.827926	0.830016	0.840215	1.41934	1.37791	1.44552	1.29588	1.33838	mitochondria	K23740				GO:0005622 intracellular; GO:0005623 cell; GO:0005634 nucleus; GO:0005654 nucleoplasm; GO:0005737 cytoplasm; GO:0016604 nuclear body; GO:0031974 membrane-enclosed lumen; GO:0031981 nuclear lumen; GO:0043226 organelle; GO:0043227 membrane-bounded organelle; GO:0043229 intracellular organelle; GO:0043231 intracellular membrane-bounded organelle; GO:0043233 organelle lumen; GO:0070013 intracellular …				S	KOG4023	Uncharacterized conserved protein
Q91WK0	Leucine-rich repeat flightless-interacting protein 2 OS=Mus musculus OX=10090 GN=Lrrfip2 PE=1 SV=1	Lrrfip2	2.0695	5.6932e-06	Up	47.147	25.3	9	8	0.716436	0.771313	0.628311	0.732105	0.687638	0.728343	0.721352	0.715694	1.43702	1.42095	1.41917	1.54894	1.47273	nucleus				GO:0001817 regulation of cytokine production; GO:0001819 positive regulation of cytokine production; GO:0002218 activation of innate immune response; GO:0002221 pattern recognition receptor signaling pathway; GO:0002224 toll-like receptor signaling pathway; GO:0002253 activation of immune response; GO:0002376 immune system process; GO:0002682 regulation of immune system process; GO:0002684 positi…		GO:0000981 DNA-binding transcription factor activity, RNA polymerase II-specific; GO:0003700 DNA-binding transcription factor activity; GO:0005488 binding; GO:0005515 protein binding; GO:0019904 protein domain specific binding; GO:0030275 LRR domain binding; GO:0140110 transcription regulator activity;			K	KOG2010	Double stranded RNA binding protein
O88307	Sortilin-related receptor OS=Mus musculus OX=10090 GN=Sorl1 PE=1 SV=3	Sorl1	2.0661	7.6452e-07	Up	247.08	13.9	24	24	0.71674	0.634421	0.718712	0.770426	0.764177	0.779757	0.759511	0.728821	1.46734	1.43692	1.44742	1.36055	1.41521	extracellular,plasma membrane	K24498			GO:0001932 regulation of protein phosphorylation; GO:0001933 negative regulation of protein phosphorylation; GO:0006469 negative regulation of protein kinase activity; GO:0006605 protein targeting; GO:0006622 protein targeting to lysosome; GO:0006623 protein targeting to vacuole; GO:0006807 nitrogen compound metabolic process; GO:0006810 transport; GO:0006886 intracellular protein transport; GO:0…	GO:0000139 Golgi membrane; GO:0005576 extracellular region; GO:0005615 extracellular space; GO:0005622 intracellular; GO:0005623 cell; GO:0005634 nucleus; GO:0005635 nuclear envelope; GO:0005641 nuclear envelope lumen; GO:0005737 cytoplasm; GO:0005768 endosome; GO:0005769 early endosome; GO:0005770 late endosome; GO:0005771 multivesicular body; GO:0005783 endoplasmic reticulum; GO:0005794 Golgi a…	GO:0001540 amyloid-beta binding; GO:0004888 transmembrane signaling receptor activity; GO:0005041 low-density lipoprotein particle receptor activity; GO:0005488 binding; GO:0005515 protein binding; GO:0019899 enzyme binding; GO:0030169 low-density lipoprotein particle binding; GO:0030228 lipoprotein particle receptor activity; GO:0030306 ADP-ribosylation factor binding; GO:0031267 small GTPase bi…	PF00041	Fibronectin type III domain	T	KOG3511	Sortilin and related receptors
Q8BYU6	Torsin-1A-interacting protein 2 OS=Mus musculus OX=10090 GN=Tor1aip2 PE=1 SV=1	Tor1aip2	2.0641	3.5094e-05	Up	54.495	37.5	12	11	0.557345	0.676617	0.697923	0.910289	0.791331	0.887719	0.946714	0.886151	1.26278	1.21424	1.41293	1.32238	1.43358	cytoplasm				GO:0006996 organelle organization; GO:0007029 endoplasmic reticulum organization; GO:0008104 protein localization; GO:0009987 cellular process; GO:0010256 endomembrane system organization; GO:0016043 cellular component organization; GO:0032781 positive regulation of ATPase activity; GO:0033036 macromolecule localization; GO:0033365 protein localization to organelle; GO:0034504 protein localizatio…	GO:0005622 intracellular; GO:0005623 cell; GO:0005634 nucleus; GO:0005635 nuclear envelope; GO:0005737 cytoplasm; GO:0005783 endoplasmic reticulum; GO:0005789 endoplasmic reticulum membrane; GO:0012505 endomembrane system; GO:0016020 membrane; GO:0031090 organelle membrane; GO:0031965 nuclear membrane; GO:0031967 organelle envelope; GO:0031975 envelope; GO:0031984 organelle subcompartment; GO:004…	GO:0001671 ATPase activator activity; GO:0005488 binding; GO:0005515 protein binding; GO:0008047 enzyme activator activity; GO:0019899 enzyme binding; GO:0030234 enzyme regulator activity; GO:0051117 ATPase binding; GO:0060589 nucleoside-triphosphatase regulator activity; GO:0060590 ATPase regulator activity; GO:0098772 molecular function regulator;
P15920	V-type proton ATPase 116 kDa subunit a2 OS=Mus musculus OX=10090 GN=Atp6v0a2 PE=1 SV=2	Atp6v0a2	2.0562	7.42206e-05	Up	98.144	14	9	8	0.720516	0.606266	0.525801	1.2119	0.784887	1.04347	0.828435	0.92979	1.24952	1.31102	1.18951	1.21333	1.38556	plasma membrane	K02154	ATPeV0A; V-type H+-transporting ATPase subunit a	mmu04966 Collecting duct acid secretion; mmu05165 Human papillomavirus infection; mmu00190 Oxidative phosphorylation; mmu01100 Metabolic pathways; mmu05323 Rheumatoid arthritis; mmu05152 Tuberculosis; mmu04142 Lysosome; mmu04145 Phagosome; mmu04721 Synaptic vesicle cycle	GO:0000041 transition metal ion transport; GO:0002376 immune system process; GO:0006139 nucleobase-containing compound metabolic process; GO:0006163 purine nucleotide metabolic process; GO:0006164 purine nucleotide biosynthetic process; GO:0006725 cellular aromatic compound metabolic process; GO:0006753 nucleoside phosphate metabolic process; GO:0006754 ATP biosynthetic process; GO:0006793 phosph…	GO:0001669 acrosomal vesicle; GO:0005622 intracellular; GO:0005623 cell; GO:0005737 cytoplasm; GO:0005768 endosome; GO:0005773 vacuole; GO:0005774 vacuolar membrane; GO:0005886 plasma membrane; GO:0005929 cilium; GO:0010008 endosome membrane; GO:0012505 endomembrane system; GO:0012506 vesicle membrane; GO:0016020 membrane; GO:0016469 proton-transporting two-sector ATPase complex; GO:0016471 vacuo…	GO:0003824 catalytic activity; GO:0005215 transporter activity; GO:0005488 binding; GO:0005515 protein binding; GO:0008324 cation transmembrane transporter activity; GO:0015075 ion transmembrane transporter activity; GO:0015077 monovalent inorganic cation transmembrane transporter activity; GO:0015078 proton transmembrane transporter activity; GO:0015318 inorganic molecular entity transmembrane t…			C	KOG2189	Vacuolar H+-ATPase V0 sector, subunit a
Q8VCC9	Spondin-1 OS=Mus musculus OX=10090 GN=Spon1 PE=1 SV=1	Spon1	2.0548	0.000251391	Up	90.82	23.2	11	11		0.376135	0.377475	1.48687	1.51213	1.51676	1.30926	1.55005	0.81902	0.817376	0.701757	0.678253	0.854914	extracellular	K24427				GO:0005622 intracellular; GO:0005623 cell; GO:0005737 cytoplasm; GO:0005783 endoplasmic reticulum; GO:0005788 endoplasmic reticulum lumen; GO:0012505 endomembrane system; GO:0031974 membrane-enclosed lumen; GO:0043226 organelle; GO:0043227 membrane-bounded organelle; GO:0043229 intracellular organelle; GO:0043231 intracellular membrane-bounded organelle; GO:0043233 organelle lumen; GO:0070013 int…		PF00090	Thrombospondin type 1 domain	W	KOG3539	Spondins, extracellular matrix proteins
Q61210	Rho guanine nucleotide exchange factor 1 OS=Mus musculus OX=10090 GN=Arhgef1 PE=1 SV=2	Arhgef1	2.0525	4.37068e-06	Up	102.8	18.2	11	11	0.657155	0.590139	0.56074	1.03996	1.00993	1.05645	0.9421	0.958616	1.2127	1.2673	1.19545	1.17362	1.33584	cytoplasm	K12330	ARHGEF1; Rho guanine nucleotide exchange factor 1	mmu04270 Vascular smooth muscle contraction; mmu04810 Regulation of actin cytoskeleton; mmu04928 Parathyroid hormone synthesis, secretion and action; mmu05135 Yersinia infection; mmu05205 Proteoglycans in cancer; mmu05163 Human cytomegalovirus infection; mmu05200 Pathways in cancer; mmu04611 Platelet activation	GO:0007154 cell communication; GO:0007165 signal transduction; GO:0007186 G protein-coupled receptor signaling pathway; GO:0007264 small GTPase mediated signal transduction; GO:0007265 Ras protein signal transduction; GO:0007266 Rho protein signal transduction; GO:0008283 cell population proliferation; GO:0009966 regulation of signal transduction; GO:0009987 cellular process; GO:0010646 regulatio…	GO:0005622 intracellular; GO:0005623 cell; GO:0005737 cytoplasm; GO:0005829 cytosol; GO:0005886 plasma membrane; GO:0016020 membrane; GO:0071944 cell periphery;	GO:0005085 guanyl-nucleotide exchange factor activity; GO:0005088 Ras guanyl-nucleotide exchange factor activity; GO:0005089 Rho guanyl-nucleotide exchange factor activity; GO:0005488 binding; GO:0005515 protein binding; GO:0017016 Ras GTPase binding; GO:0017048 Rho GTPase binding; GO:0019899 enzyme binding; GO:0031267 small GTPase binding; GO:0051020 GTPase binding; GO:0098772 molecular function…	PF09128; PF00621	Regulator of G protein signalling-like domain; RhoGEF domain	T	KOG3520	Predicted guanine nucleotide exchange factor
Q9D903	Probable rRNA-processing protein EBP2 OS=Mus musculus OX=10090 GN=Ebna1bp2 PE=2 SV=1	Ebna1bp2	2.0523	0.000180181	Up	34.702	15.4	4	4	0.790031	0.624828		0.691558	0.703815	0.617076	0.670973	0.642375	1.41758	1.45362	1.34509	1.51459	1.52847	nucleus	K14823			GO:0006139 nucleobase-containing compound metabolic process; GO:0006364 rRNA processing; GO:0006396 RNA processing; GO:0006725 cellular aromatic compound metabolic process; GO:0006807 nitrogen compound metabolic process; GO:0008152 metabolic process; GO:0009987 cellular process; GO:0010467 gene expression; GO:0016070 RNA metabolic process; GO:0016072 rRNA metabolic process; GO:0022613 ribonucleop…	GO:0005622 intracellular; GO:0005623 cell; GO:0005634 nucleus; GO:0005730 nucleolus; GO:0030684 preribosome; GO:0030687 preribosome, large subunit precursor; GO:0031974 membrane-enclosed lumen; GO:0031981 nuclear lumen; GO:0032991 protein-containing complex; GO:0034399 nuclear periphery; GO:0043226 organelle; GO:0043227 membrane-bounded organelle; GO:0043228 non-membrane-bounded organelle; GO:004…				A	KOG3080	Nucleolar protein-like/EBNA1-binding protein
P70336	Rho-associated protein kinase 2 OS=Mus musculus OX=10090 GN=Rock2 PE=1 SV=1	Rock2	2.0427	1.33253e-08	Up	160.58	31.8	32	27	0.646306	0.638352	0.681568	0.880728	0.884218	0.88223	0.849707	0.842769	1.32721	1.31806	1.34604	1.33198	1.37083	nucleus	K17388	ROCK2; Rho-associated protein kinase 2 [EC:2.7.11.1]	mmu04270 Vascular smooth muscle contraction; mmu04810 Regulation of actin cytoskeleton; mmu04510 Focal adhesion; mmu05135 Yersinia infection; mmu04921 Oxytocin signaling pathway; mmu05205 Proteoglycans in cancer; mmu05163 Human cytomegalovirus infection; mmu04022 cGMP-PKG signaling pathway; mmu04530 Tight junction; mmu04310 Wnt signaling pathway; mmu04062 Chemokine signaling pathway; mmu04024 cAM…	GO:0000226 microtubule cytoskeleton organization; GO:0000902 cell morphogenesis; GO:0000904 cell morphogenesis involved in differentiation; GO:0001816 cytokine production; GO:0001817 regulation of cytokine production; GO:0001819 positive regulation of cytokine production; GO:0001838 embryonic epithelial tube formation; GO:0001841 neural tube formation; GO:0001843 neural tube closure; GO:0001932 r…	GO:0000922 spindle pole; GO:0005622 intracellular; GO:0005623 cell; GO:0005634 nucleus; GO:0005737 cytoplasm; GO:0005813 centrosome; GO:0005815 microtubule organizing center; GO:0005819 spindle; GO:0005829 cytosol; GO:0005856 cytoskeleton; GO:0005886 plasma membrane; GO:0015630 microtubule cytoskeleton; GO:0016020 membrane; GO:0031616 spindle pole centrosome; GO:0032991 protein-containing complex…	GO:0003824 catalytic activity; GO:0004672 protein kinase activity; GO:0004674 protein serine/threonine kinase activity; GO:0005198 structural molecule activity; GO:0016301 kinase activity; GO:0016740 transferase activity; GO:0016772 transferase activity, transferring phosphorus-containing groups; GO:0016773 phosphotransferase activity, alcohol group as acceptor; GO:0072518 Rho-dependent protein s…	PF00069; PF08912	Protein kinase domain; Rho Binding	T	KOG0612	Rho-associated, coiled-coil containing protein kinase
Q9D8Y0	EF-hand domain-containing protein D2 OS=Mus musculus OX=10090 GN=Efhd2 PE=1 SV=1	Efhd2	2.0279	9.99957e-09	Up	26.791	41.2	10	8	0.613706	0.643644	0.628545	0.95655	0.948963	0.931955	0.946308	0.956424	1.30107	1.306	1.26686	1.24467	1.2553	cytoplasm	K23922					GO:0005488 binding; GO:0005509 calcium ion binding; GO:0043167 ion binding; GO:0043169 cation binding; GO:0046872 metal ion binding;	PF13499	EF-hand domain pair	S	KOG0041	Predicted Ca2+-binding protein, EF-Hand protein superfamily
O89001	Carboxypeptidase D OS=Mus musculus OX=10090 GN=Cpd PE=1 SV=2	Cpd	2.0245	1.43678e-06	Up	152.4	11.5	13	13	0.616202	0.583248	0.685412	0.955434	0.974325	0.932223	0.955985	0.937475	1.27107	1.27582	1.32169	1.24604	1.24507	peroxisome	K07752			GO:0006508 proteolysis; GO:0006518 peptide metabolic process; GO:0006807 nitrogen compound metabolic process; GO:0008152 metabolic process; GO:0009987 cellular process; GO:0010033 response to organic substance; GO:0010467 gene expression; GO:0016485 protein processing; GO:0019538 protein metabolic process; GO:0034097 response to cytokine; GO:0034641 cellular nitrogen compound metabolic process; G…	GO:0005576 extracellular region; GO:0005615 extracellular space; GO:0005622 intracellular; GO:0005623 cell; GO:0005634 nucleus; GO:0005737 cytoplasm; GO:0005794 Golgi apparatus; GO:0005802 trans-Golgi network; GO:0012505 endomembrane system; GO:0016020 membrane; GO:0016021 integral component of membrane; GO:0031224 intrinsic component of membrane; GO:0031984 organelle subcompartment; GO:0043226 o…	GO:0003824 catalytic activity; GO:0004180 carboxypeptidase activity; GO:0004181 metallocarboxypeptidase activity; GO:0004185 serine-type carboxypeptidase activity; GO:0005488 binding; GO:0005515 protein binding; GO:0008233 peptidase activity; GO:0008235 metalloexopeptidase activity; GO:0008236 serine-type peptidase activity; GO:0008237 metallopeptidase activity; GO:0008238 exopeptidase activity; …	PF00246; PF13620	Zinc carboxypeptidase; Carboxypeptidase regulatory-like domain	S	KOG2649	Zinc carboxypeptidase
P97496	SWI/SNF complex subunit SMARCC1 OS=Mus musculus OX=10090 GN=Smarcc1 PE=1 SV=2	Smarcc1	2.0157	8.89419e-05	Up	122.89	18.8	13	7	0.567048	0.629593	0.785586	0.714786	0.878585	1.01402	0.960597	0.79063	1.36693	1.33811	1.38495	1.35122	1.21794	cytoplasm	K11649	SMARCC; SWI/SNF related-matrix-associated actin-dependent regulator of chromatin subfamily C	mmu04714 Thermogenesis; mmu05225 Hepatocellular carcinoma	GO:0006323 DNA packaging; GO:0006325 chromatin organization; GO:0006333 chromatin assembly or disassembly; GO:0006337 nucleosome disassembly; GO:0006338 chromatin remodeling; GO:0006355 regulation of transcription, DNA-templated; GO:0006357 regulation of transcription by RNA polymerase II; GO:0006996 organelle organization; GO:0007154 cell communication; GO:0007165 signal transduction; GO:0007166…	GO:0000228 nuclear chromosome; GO:0000785 chromatin; GO:0000790 nuclear chromatin; GO:0000803 sex chromosome; GO:0001741 XY body; GO:0005622 intracellular; GO:0005623 cell; GO:0005634 nucleus; GO:0005654 nucleoplasm; GO:0005694 chromosome; GO:0005737 cytoplasm; GO:0016514 SWI/SNF complex; GO:0031974 membrane-enclosed lumen; GO:0031981 nuclear lumen; GO:0032991 protein-containing complex; GO:00432…	GO:0000981 DNA-binding transcription factor activity, RNA polymerase II-specific; GO:0003682 chromatin binding; GO:0003700 DNA-binding transcription factor activity; GO:0003712 transcription coregulator activity; GO:0003713 transcription coactivator activity; GO:0005488 binding; GO:0005515 protein binding; GO:0047485 protein N-terminus binding; GO:0140110 transcription regulator activity;	PF04433; PF00249	SWIRM domain; Myb-like DNA-binding domain	B	KOG1279	Chromatin remodeling factor subunit and related transcription factors
Q91VS7	Microsomal glutathione S-transferase 1 OS=Mus musculus OX=10090 GN=Mgst1 PE=1 SV=3	Mgst1	2.0092	9.7272e-08	Up	17.551	26.5	3	3	0.692509	0.733365	0.758624	0.708065	0.704176	0.702536	0.7032	0.682305	1.4299	1.4448	1.44724	1.50985	1.48342	mitochondria	K00799	GST; glutathione S-transferase [EC:2.5.1.18]	mmu05204 Chemical carcinogenesis; mmu05418 Fluid shear stress and atherosclerosis; mmu01100 Metabolic pathways; mmu00983 Drug metabolism - other enzymes; mmu00480 Glutathione metabolism; mmu01524 Platinum drug resistance; mmu05225 Hepatocellular carcinoma; mmu00982 Drug metabolism - cytochrome P450; mmu00980 Metabolism of xenobiotics by cytochrome P450; mmu05200 Pathways in cancer	GO:0000003 reproduction; GO:0001775 cell activation; GO:0002237 response to molecule of bacterial origin; GO:0002252 immune effector process; GO:0002263 cell activation involved in immune response; GO:0002274 myeloid leukocyte activation; GO:0002275 myeloid cell activation involved in immune response; GO:0002283 neutrophil activation involved in immune response; GO:0002366 leukocyte activation in…	GO:0000323 lytic vacuole; GO:0005622 intracellular; GO:0005623 cell; GO:0005634 nucleus; GO:0005737 cytoplasm; GO:0005739 mitochondrion; GO:0005740 mitochondrial envelope; GO:0005741 mitochondrial outer membrane; GO:0005764 lysosome; GO:0005765 lysosomal membrane; GO:0005766 primary lysosome; GO:0005773 vacuole; GO:0005774 vacuolar membrane; GO:0005777 peroxisome; GO:0005778 peroxisomal membrane;…	GO:0003824 catalytic activity; GO:0004364 glutathione transferase activity; GO:0004601 peroxidase activity; GO:0004602 glutathione peroxidase activity; GO:0005488 binding; GO:0005515 protein binding; GO:0016209 antioxidant activity; GO:0016491 oxidoreductase activity; GO:0016684 oxidoreductase activity, acting on peroxide as acceptor; GO:0016740 transferase activity; GO:0016765 transferase activi…
P29699	Alpha-2-HS-glycoprotein OS=Mus musculus OX=10090 GN=Ahsg PE=1 SV=1	Ahsg	2.0081	2.24013e-05	Up	37.325	43.5	8	8	0.849757	0.827497	0.679273	0.551513	0.526341	0.551203	0.526981	0.600577	1.51327	1.60853	1.54689	1.7017	1.51646	extracellular	K23409			GO:0000003 reproduction; GO:0001501 skeletal system development; GO:0001503 ossification; GO:0001558 regulation of cell growth; GO:0001775 cell activation; GO:0001932 regulation of protein phosphorylation; GO:0001933 negative regulation of protein phosphorylation; GO:0002252 immune effector process; GO:0002263 cell activation involved in immune response; GO:0002274 myeloid leukocyte activation; G…	GO:0005576 extracellular region; GO:0005615 extracellular space; GO:0005622 intracellular; GO:0005623 cell; GO:0005737 cytoplasm; GO:0005783 endoplasmic reticulum; GO:0005788 endoplasmic reticulum lumen; GO:0005794 Golgi apparatus; GO:0005886 plasma membrane; GO:0012505 endomembrane system; GO:0016020 membrane; GO:0030141 secretory granule; GO:0031012 extracellular matrix; GO:0031091 platelet alp…	GO:0004857 enzyme inhibitor activity; GO:0004860 protein kinase inhibitor activity; GO:0004866 endopeptidase inhibitor activity; GO:0019207 kinase regulator activity; GO:0019210 kinase inhibitor activity; GO:0019887 protein kinase regulator activity; GO:0030234 enzyme regulator activity; GO:0030292 protein tyrosine kinase inhibitor activity; GO:0030294 receptor signaling protein tyrosine kinase i…	PF00031	Cystatin domain
Q9CX80	Cytoglobin OS=Mus musculus OX=10090 GN=Cygb PE=1 SV=1	Cygb	2.0063	0.000975624	Up	21.465	32.6	7	7	0.541241	0.491263	0.379681	1.35441	1.44684	1.37324	1.38785	1.3033	1.04388	0.80012	0.870682	1.1392	0.868297	cytoplasm	K21894			GO:0001666 response to hypoxia; GO:0006082 organic acid metabolic process; GO:0006629 lipid metabolic process; GO:0006631 fatty acid metabolic process; GO:0006810 transport; GO:0006950 response to stress; GO:0006979 response to oxidative stress; GO:0008152 metabolic process; GO:0009628 response to abiotic stimulus; GO:0009636 response to toxic substance; GO:0009889 regulation of biosynthetic proc…	GO:0005622 intracellular; GO:0005623 cell; GO:0005634 nucleus; GO:0005654 nucleoplasm; GO:0005737 cytoplasm; GO:0005829 cytosol; GO:0016604 nuclear body; GO:0016607 nuclear speck; GO:0031974 membrane-enclosed lumen; GO:0031981 nuclear lumen; GO:0036477 somatodendritic compartment; GO:0042995 cell projection; GO:0043005 neuron projection; GO:0043025 neuronal cell body; GO:0043226 organelle; GO:004…	GO:0003824 catalytic activity; GO:0004096 catalase activity; GO:0004601 peroxidase activity; GO:0005344 oxygen carrier activity; GO:0005488 binding; GO:0008941 nitric oxide dioxygenase activity; GO:0016209 antioxidant activity; GO:0016491 oxidoreductase activity; GO:0016684 oxidoreductase activity, acting on peroxide as acceptor; GO:0016705 oxidoreductase activity, acting on paired donors, with i…	PF00042	Globin	C	KOG3378	Globins and related hemoproteins
Q80U95	Ubiquitin-protein ligase E3C OS=Mus musculus OX=10090 GN=Ube3c PE=1 SV=2	Ube3c	2.0043	3.55938e-05	Up	123.97	14.7	10	10	0.702223	0.566121	0.731292	1.01379	0.812528	0.875969	0.866152	0.752169	1.24195	1.31373	1.36408	1.40375	1.35624	nucleus	K10589	UBE3C; ubiquitin-protein ligase E3 C [EC:2.3.2.26]	mmu04120 Ubiquitin mediated proteolysis	GO:0000209 protein polyubiquitination; GO:0006464 cellular protein modification process; GO:0006807 nitrogen compound metabolic process; GO:0008152 metabolic process; GO:0009987 cellular process; GO:0016567 protein ubiquitination; GO:0019538 protein metabolic process; GO:0032446 protein modification by small protein conjugation; GO:0036211 protein modification process; GO:0043170 macromolecule me…	GO:0005622 intracellular; GO:0005623 cell; GO:0005737 cytoplasm;	GO:0003824 catalytic activity; GO:0004842 ubiquitin-protein transferase activity; GO:0016740 transferase activity; GO:0019787 ubiquitin-like protein transferase activity; GO:0061630 ubiquitin protein ligase activity; GO:0061659 ubiquitin-like protein ligase activity; GO:0140096 catalytic activity, acting on a protein;	PF00632	HECT-domain (ubiquitin-transferase)	O	KOG0942	E3 ubiquitin protein ligase
Q9D6L8	Peptidyl-prolyl cis-trans isomerase-like 3 OS=Mus musculus OX=10090 GN=Ppil3 PE=1 SV=1	Ppil3	2.0028	0.0220614	Up	18.127	22.4	3	3	0.674608		0.695804			0.792023	0.59014	0.385666	1.03728	1.85148	1.71934	1.09783	1.15583	cytoplasm	K12734			GO:0000375 RNA splicing, via transesterification reactions; GO:0000377 RNA splicing, via transesterification reactions with bulged adenosine as nucleophile; GO:0000398 mRNA splicing, via spliceosome; GO:0000413 protein peptidyl-prolyl isomerization; GO:0006139 nucleobase-containing compound metabolic process; GO:0006396 RNA processing; GO:0006397 mRNA processing; GO:0006464 cellular protein modif…	GO:0005622 intracellular; GO:0005623 cell; GO:0005634 nucleus; GO:0005681 spliceosomal complex; GO:0032991 protein-containing complex; GO:0043226 organelle; GO:0043227 membrane-bounded organelle; GO:0043229 intracellular organelle; GO:0043231 intracellular membrane-bounded organelle; GO:0071013 catalytic step 2 spliceosome; GO:1902494 catalytic complex; GO:1990904 ribonucleoprotein complex;	GO:0003755 peptidyl-prolyl cis-trans isomerase activity; GO:0003824 catalytic activity; GO:0016853 isomerase activity; GO:0016859 cis-trans isomerase activity; GO:0140096 catalytic activity, acting on a protein;	PF00160	Cyclophilin type peptidyl-prolyl cis-trans isomerase/CLD	O	KOG0884	Similar to cyclophilin-type peptidyl-prolyl cis-trans isomerase
P52633	Signal transducer and transcription activator 6 OS=Mus musculus OX=10090 GN=Stat6 PE=1 SV=2	Stat6	2.001	0.00012736	Up	93.496	18	8	8		0.713518	0.564168	0.778232	0.859984	0.952962	0.890821	0.848847	1.28499	1.28734	1.26555	1.32798	1.22562	cytoplasm	K11225	STAT6; signal transducer and activator of transcription 6	mmu04659 Th17 cell differentiation; mmu04630 JAK-STAT signaling pathway; mmu04217 Necroptosis; mmu05161 Hepatitis B; mmu04658 Th1 and Th2 cell differentiation; mmu05321 Inflammatory bowel disease; mmu05200 Pathways in cancer	GO:0000018 regulation of DNA recombination; GO:0000122 negative regulation of transcription by RNA polymerase II; GO:0000302 response to reactive oxygen species; GO:0001775 cell activation; GO:0001817 regulation of cytokine production; GO:0001819 positive regulation of cytokine production; GO:0002250 adaptive immune response; GO:0002252 immune effector process; GO:0002263 cell activation involved…	GO:0000228 nuclear chromosome; GO:0000785 chromatin; GO:0000790 nuclear chromatin; GO:0005622 intracellular; GO:0005623 cell; GO:0005634 nucleus; GO:0005635 nuclear envelope; GO:0005654 nucleoplasm; GO:0005694 chromosome; GO:0005737 cytoplasm; GO:0005829 cytosol; GO:0012505 endomembrane system; GO:0016020 membrane; GO:0031090 organelle membrane; GO:0031965 nuclear membrane; GO:0031967 organelle e…	GO:0000976 transcription regulatory region sequence-specific DNA binding; GO:0000977 RNA polymerase II transcription regulatory region sequence-specific DNA binding; GO:0000978 RNA polymerase II cis-regulatory region sequence-specific DNA binding; GO:0000981 DNA-binding transcription factor activity, RNA polymerase II-specific; GO:0000987 cis-regulatory region sequence-specific DNA binding; GO:00…	PF02865; PF02864; PF00017	STAT protein, protein interaction domain; STAT protein, DNA binding domain; SH2 domain	K	KOG3667	STAT protein
Q1HFZ0	RNA cytosine C(5)-methyltransferase NSUN2 OS=Mus musculus OX=10090 GN=Nsun2 PE=1 SV=2	Nsun2	1.999	3.49277e-08	Up	85.451	48.5	26	26	0.675072	0.729689	0.679042	0.75306	0.814442	0.813808	0.815639	0.776571	1.41264	1.37237	1.39075	1.39511	1.37181	nucleus	K15335			GO:0000003 reproduction; GO:0000075 cell cycle checkpoint; GO:0001510 RNA methylation; GO:0001942 hair follicle development; GO:0003006 developmental process involved in reproduction; GO:0006139 nucleobase-containing compound metabolic process; GO:0006396 RNA processing; GO:0006399 tRNA metabolic process; GO:0006400 tRNA modification; GO:0006725 cellular aromatic compound metabolic process; GO:00…	GO:0005622 intracellular; GO:0005623 cell; GO:0005634 nucleus; GO:0005654 nucleoplasm; GO:0005730 nucleolus; GO:0005737 cytoplasm; GO:0005819 spindle; GO:0005856 cytoskeleton; GO:0015630 microtubule cytoskeleton; GO:0031974 membrane-enclosed lumen; GO:0031981 nuclear lumen; GO:0032991 protein-containing complex; GO:0033391 chromatoid body; GO:0035770 ribonucleoprotein granule; GO:0036464 cytoplas…	GO:0000049 tRNA binding; GO:0003676 nucleic acid binding; GO:0003723 RNA binding; GO:0003824 catalytic activity; GO:0005488 binding; GO:0008168 methyltransferase activity; GO:0008173 RNA methyltransferase activity; GO:0008175 tRNA methyltransferase activity; GO:0008757 S-adenosylmethionine-dependent methyltransferase activity; GO:0016427 tRNA (cytosine) methyltransferase activity; GO:0016428 tRNA…			J	KOG2198	tRNA cytosine-5-methylases and related enzymes of the NOL1/NOP2/sun superfamily
Q8BMK4	Cytoskeleton-associated protein 4 OS=Mus musculus OX=10090 GN=Ckap4 PE=1 SV=2	Ckap4	1.9953	8.56119e-08	Up	63.691	34.1	18	18	0.60192	0.622264	0.62827	0.973589	1.01244	0.998001	1.00536	0.997905	1.28901	1.23515	1.17683	1.20715	1.2521	plasma membrane	K13999	CKAP4; cytoskeleton-associated protein 4	mmu04141 Protein processing in endoplasmic reticulum	GO:0001775 cell activation; GO:0002252 immune effector process; GO:0002263 cell activation involved in immune response; GO:0002274 myeloid leukocyte activation; GO:0002275 myeloid cell activation involved in immune response; GO:0002283 neutrophil activation involved in immune response; GO:0002366 leukocyte activation involved in immune response; GO:0002376 immune system process; GO:0002443 leukoc…	GO:0000323 lytic vacuole; GO:0005622 intracellular; GO:0005623 cell; GO:0005634 nucleus; GO:0005654 nucleoplasm; GO:0005737 cytoplasm; GO:0005764 lysosome; GO:0005765 lysosomal membrane; GO:0005766 primary lysosome; GO:0005773 vacuole; GO:0005774 vacuolar membrane; GO:0005783 endoplasmic reticulum; GO:0005788 endoplasmic reticulum lumen; GO:0005789 endoplasmic reticulum membrane; GO:0005791 rough…
O89017	Legumain OS=Mus musculus OX=10090 GN=Lgmn PE=1 SV=1	Lgmn	1.9928	5.9983e-08	Up	49.372	46	11	11	0.711995	0.704162	0.738617	0.730049	0.750612	0.757344	0.723684	0.726805	1.49315	1.42619	1.38158	1.39847	1.45734	extracellular	K01369	LGMN; legumain [EC:3.4.22.34]	mmu04612 Antigen processing and presentation; mmu04142 Lysosome	GO:0002376 immune system process; GO:0002478 antigen processing and presentation of exogenous peptide antigen; GO:0002495 antigen processing and presentation of peptide antigen via MHC class II; GO:0002504 antigen processing and presentation of peptide or polysaccharide antigen via MHC class II; GO:0002682 regulation of immune system process; GO:0002684 positive regulation of immune system proces…	GO:0000323 lytic vacuole; GO:0005576 extracellular region; GO:0005622 intracellular; GO:0005623 cell; GO:0005737 cytoplasm; GO:0005764 lysosome; GO:0005768 endosome; GO:0005770 late endosome; GO:0005773 vacuole; GO:0005775 vacuolar lumen; GO:0012505 endomembrane system; GO:0031410 cytoplasmic vesicle; GO:0031904 endosome lumen; GO:0031974 membrane-enclosed lumen; GO:0031982 vesicle; GO:0036019 en…	GO:0003824 catalytic activity; GO:0004175 endopeptidase activity; GO:0004197 cysteine-type endopeptidase activity; GO:0008233 peptidase activity; GO:0008234 cysteine-type peptidase activity; GO:0016787 hydrolase activity; GO:0070011 peptidase activity, acting on L-amino acid peptides; GO:0140096 catalytic activity, acting on a protein;			O	KOG1348	Asparaginyl peptidases
Q08093	Calponin-2 OS=Mus musculus OX=10090 GN=Cnn2 PE=1 SV=1	Cnn2	1.9908	1.12526e-05	Up	33.155	27.9	6	5	0.613232	0.611039	0.519961	1.08332	1.12949	1.08883	1.08949	1.07716	1.15172	1.2631	1.08747	1.16441	1.12078	cytoplasm				GO:0001775 cell activation; GO:0002252 immune effector process; GO:0002263 cell activation involved in immune response; GO:0002274 myeloid leukocyte activation; GO:0002275 myeloid cell activation involved in immune response; GO:0002283 neutrophil activation involved in immune response; GO:0002366 leukocyte activation involved in immune response; GO:0002376 immune system process; GO:0002443 leukoc…	GO:0001725 stress fiber; GO:0005576 extracellular region; GO:0005622 intracellular; GO:0005623 cell; GO:0005737 cytoplasm; GO:0005856 cytoskeleton; GO:0005911 cell-cell junction; GO:0012505 endomembrane system; GO:0015629 actin cytoskeleton; GO:0030054 cell junction; GO:0030141 secretory granule; GO:0031410 cytoplasmic vesicle; GO:0031974 membrane-enclosed lumen; GO:0031982 vesicle; GO:0031983 ve…	GO:0003779 actin binding; GO:0005488 binding; GO:0005515 protein binding; GO:0008092 cytoskeletal protein binding;	PF00307	Calponin homology (CH) domain	Z	KOG2046	Calponin
O88327	Alpha-catulin OS=Mus musculus OX=10090 GN=Ctnnal1 PE=1 SV=1	Ctnnal1	1.9907	0.00101439	Up	81.462	13.3	5	5		0.515913	0.683455	0.868218	1.19409	0.91145	1.09891	0.75912	1.02605	1.20745	1.31328	1.17735	1.24472	cytoplasm				GO:0007154 cell communication; GO:0007165 signal transduction; GO:0007264 small GTPase mediated signal transduction; GO:0007265 Ras protein signal transduction; GO:0007266 Rho protein signal transduction; GO:0009987 cellular process; GO:0023052 signaling; GO:0035556 intracellular signal transduction; GO:0050789 regulation of biological process; GO:0050794 regulation of cellular process; GO:005089…	GO:0005622 intracellular; GO:0005623 cell; GO:0005737 cytoplasm; GO:0005829 cytosol;				W	KOG3681	Alpha-catenin
O54931	A-kinase anchor protein 2 OS=Mus musculus OX=10090 GN=Akap2 PE=1 SV=3	Akap2	1.9902	3.25758e-08	Up	98.577	29.8	23	23	0.701246	0.684319	0.71445	0.800188	0.803119	0.776642	0.779366	0.775091	1.45331	1.41118	1.36936	1.35137	1.38036	nucleus	K16519			GO:0006996 organelle organization; GO:0007010 cytoskeleton organization; GO:0007015 actin filament organization; GO:0007154 cell communication; GO:0007165 signal transduction; GO:0007166 cell surface receptor signaling pathway; GO:0007167 enzyme linked receptor protein signaling pathway; GO:0007178 transmembrane receptor protein serine/threonine kinase signaling pathway; GO:0008104 protein locali…	GO:0032991 protein-containing complex;	GO:0005488 binding; GO:0005515 protein binding; GO:0019904 protein domain specific binding; GO:0051018 protein kinase A binding;
P97868	E3 ubiquitin-protein ligase RBBP6 OS=Mus musculus OX=10090 GN=Rbbp6 PE=1 SV=5	Rbbp6	1.9888	0.00391254	Up	199.59	3.2	4	4	0.774528	0.619351		1.09039	0.760084	0.703531	0.569843	0.551805	1.13555	1.22757	1.38977	1.73221	1.44537	nucleus	K10624			GO:0000209 protein polyubiquitination; GO:0001701 in utero embryonic development; GO:0006275 regulation of DNA replication; GO:0006464 cellular protein modification process; GO:0006508 proteolysis; GO:0006511 ubiquitin-dependent protein catabolic process; GO:0006807 nitrogen compound metabolic process; GO:0006950 response to stress; GO:0006974 cellular response to DNA damage stimulus; GO:0007275 …	GO:0005622 intracellular; GO:0005623 cell; GO:0005634 nucleus; GO:0005654 nucleoplasm; GO:0005694 chromosome; GO:0005730 nucleolus; GO:0005737 cytoplasm; GO:0005815 microtubule organizing center; GO:0005829 cytosol; GO:0005856 cytoskeleton; GO:0015630 microtubule cytoskeleton; GO:0016604 nuclear body; GO:0016607 nuclear speck; GO:0031974 membrane-enclosed lumen; GO:0031981 nuclear lumen; GO:00329…	GO:0003824 catalytic activity; GO:0004842 ubiquitin-protein transferase activity; GO:0005488 binding; GO:0005515 protein binding; GO:0016740 transferase activity; GO:0019787 ubiquitin-like protein transferase activity; GO:0019899 enzyme binding; GO:0019900 kinase binding; GO:0019901 protein kinase binding; GO:0061630 ubiquitin protein ligase activity; GO:0061659 ubiquitin-like protein ligase acti…	PF08783; PF13696; PF04564	DWNN domain; Zinc knuckle; U-box domain	O	KOG0314	Predicted E3 ubiquitin ligase
Q9QZN4	F-box only protein 6 OS=Mus musculus OX=10090 GN=Fbxo6 PE=1 SV=1	Fbxo6	1.987	4.58571e-07	Up	34.492	28.5	7	7	0.706822	0.669851	0.74054	0.730069	0.785339	0.840118	0.789626	0.726003	1.43782	1.46436	1.36193	1.34465	1.40287	cytoplasm	K10100	FBXO6; F-box protein 6	mmu04141 Protein processing in endoplasmic reticulum	GO:0006464 cellular protein modification process; GO:0006508 proteolysis; GO:0006511 ubiquitin-dependent protein catabolic process; GO:0006516 glycoprotein catabolic process; GO:0006807 nitrogen compound metabolic process; GO:0006950 response to stress; GO:0008152 metabolic process; GO:0009056 catabolic process; GO:0009057 macromolecule catabolic process; GO:0009100 glycoprotein metabolic process…	GO:0000151 ubiquitin ligase complex; GO:0005622 intracellular; GO:0005623 cell; GO:0005737 cytoplasm; GO:0005783 endoplasmic reticulum; GO:0012505 endomembrane system; GO:0019005 SCF ubiquitin ligase complex; GO:0031461 cullin-RING ubiquitin ligase complex; GO:0032991 protein-containing complex; GO:0043226 organelle; GO:0043227 membrane-bounded organelle; GO:0043229 intracellular organelle; GO:00…	GO:0003824 catalytic activity; GO:0004842 ubiquitin-protein transferase activity; GO:0005488 binding; GO:0016740 transferase activity; GO:0019787 ubiquitin-like protein transferase activity; GO:0030246 carbohydrate binding; GO:0140096 catalytic activity, acting on a protein;	PF12937	F-box-like
Q8BIW1	Exopolyphosphatase PRUNE1 OS=Mus musculus OX=10090 GN=Prune1 PE=1 SV=1	Prune1	1.9807	4.31815e-07	Up	50.239	49.6	14	14	0.644563	0.659153	0.695338	0.905834	0.929368	0.860084	0.856677	0.849613	1.36047	1.38991	1.26551	1.27104	1.31244	nucleus	K01514	PRUNE; exopolyphosphatase [EC:3.6.1.11]	mmu01100 Metabolic pathways; mmu00230 Purine metabolism	GO:0006793 phosphorus metabolic process; GO:0006796 phosphate-containing compound metabolic process; GO:0007275 multicellular organism development; GO:0007399 nervous system development; GO:0008152 metabolic process; GO:0009987 cellular process; GO:0016311 dephosphorylation; GO:0022008 neurogenesis; GO:0030154 cell differentiation; GO:0031110 regulation of microtubule polymerization or depolymeri…	GO:0005622 intracellular; GO:0005623 cell; GO:0005737 cytoplasm; GO:0005829 cytosol;	GO:0003824 catalytic activity; GO:0005488 binding; GO:0005515 protein binding; GO:0008092 cytoskeletal protein binding; GO:0015631 tubulin binding; GO:0016787 hydrolase activity; GO:0016788 hydrolase activity, acting on ester bonds; GO:0016791 phosphatase activity; GO:0042578 phosphoric ester hydrolase activity;			C	KOG4129	Exopolyphosphatases and related proteins
Q8BTZ4	Anaphase-promoting complex subunit 5 OS=Mus musculus OX=10090 GN=Anapc5 PE=1 SV=1	Anapc5	1.9756	5.35437e-06	Up	83.097	14.6	7	7	0.616875	0.629376	0.644499	1.20013	0.927702	0.902126	0.916602	0.937185	1.26033	1.32664	1.10002	1.30541	1.2331	extracellular	K03352	APC5; anaphase-promoting complex subunit 5	mmu04914 Progesterone-mediated oocyte maturation; mmu04114 Oocyte meiosis; mmu04110 Cell cycle; mmu05166 Human T-cell leukemia virus 1 infection; mmu04120 Ubiquitin mediated proteolysis; mmu04657 IL-17 signaling pathway	GO:0000209 protein polyubiquitination; GO:0006464 cellular protein modification process; GO:0006508 proteolysis; GO:0006511 ubiquitin-dependent protein catabolic process; GO:0006807 nitrogen compound metabolic process; GO:0008152 metabolic process; GO:0009056 catabolic process; GO:0009057 macromolecule catabolic process; GO:0009987 cellular process; GO:0010498 proteasomal protein catabolic proces…	GO:0000151 ubiquitin ligase complex; GO:0000152 nuclear ubiquitin ligase complex; GO:0005622 intracellular; GO:0005623 cell; GO:0005634 nucleus; GO:0005654 nucleoplasm; GO:0005680 anaphase-promoting complex; GO:0005737 cytoplasm; GO:0005829 cytosol; GO:0031461 cullin-RING ubiquitin ligase complex; GO:0031974 membrane-enclosed lumen; GO:0031981 nuclear lumen; GO:0032991 protein-containing complex;…	GO:0005488 binding; GO:0005515 protein binding; GO:0019899 enzyme binding; GO:0019902 phosphatase binding; GO:0019903 protein phosphatase binding;			DO	KOG4322	Anaphase-promoting complex (APC), subunit 5
Q8BVY0	Ribosomal L1 domain-containing protein 1 OS=Mus musculus OX=10090 GN=Rsl1d1 PE=1 SV=1	Rsl1d1	1.9745	4.7968e-07	Up	50.421	41.2	10	10	0.786071	0.730801	0.69435	0.673954	0.707129	0.732364	0.703196	0.695517	1.40949	1.44063	1.45738	1.50701	1.4621	nucleus	K14775			GO:0000470 maturation of LSU-rRNA; GO:0006139 nucleobase-containing compound metabolic process; GO:0006364 rRNA processing; GO:0006396 RNA processing; GO:0006725 cellular aromatic compound metabolic process; GO:0006807 nitrogen compound metabolic process; GO:0008152 metabolic process; GO:0009987 cellular process; GO:0010467 gene expression; GO:0010941 regulation of cell death; GO:0016070 RNA meta…	GO:0005622 intracellular; GO:0005623 cell; GO:0005634 nucleus; GO:0005730 nucleolus; GO:0030684 preribosome; GO:0030686 90S preribosome; GO:0031974 membrane-enclosed lumen; GO:0031981 nuclear lumen; GO:0032991 protein-containing complex; GO:0043226 organelle; GO:0043227 membrane-bounded organelle; GO:0043228 non-membrane-bounded organelle; GO:0043229 intracellular organelle; GO:0043231 intracellu…	GO:0003676 nucleic acid binding; GO:0003723 RNA binding; GO:0003729 mRNA binding; GO:0003730 mRNA 3'-UTR binding; GO:0005488 binding; GO:0048027 mRNA 5'-UTR binding; GO:0097159 organic cyclic compound binding; GO:1901363 heterocyclic compound binding;	PF00687	Ribosomal protein L1p/L10e family	J	KOG1685	Uncharacterized conserved protein
Q5PRF0	HEAT repeat-containing protein 5A OS=Mus musculus OX=10090 GN=Heatr5a PE=1 SV=2	Heatr5a	1.9719	9.81791e-05	Up	219.89	6.5	8	8	0.622445	0.54372	0.747999	0.958893	1.05289	0.914558	0.993174	0.875371	1.31824	1.34016	1.25234	1.17839	1.20183	plasma membrane									S	KOG1822	Uncharacterized conserved protein
Q91VK1	Basic leucine zipper and W2 domain-containing protein 2 OS=Mus musculus OX=10090 GN=Bzw2 PE=1 SV=1	Bzw2	1.97	5.77466e-06	Up	48.063	18.1	7	6	0.728694	0.621986	0.729196	0.812035	0.801648	0.824779	0.828652	0.823956	1.31033	1.43209	1.38749	1.30521	1.39393	nucleus					GO:0005622 intracellular; GO:0005623 cell; GO:0005737 cytoplasm;				J	KOG2297	Predicted translation factor, contains W2 domain
Q9JJ28	Protein flightless-1 homolog OS=Mus musculus OX=10090 GN=Flii PE=1 SV=1	Flii	1.9667	4.31748e-07	Up	144.8	27.1	25	25	0.686182	0.74445	0.694995	0.795296	0.775322	0.795699	0.779645	0.761033	1.4631	1.36512	1.37118	1.33378	1.43419	cytoplasm				GO:0006996 organelle organization; GO:0007010 cytoskeleton organization; GO:0007275 multicellular organism development; GO:0009987 cellular process; GO:0016043 cellular component organization; GO:0030029 actin filament-based process; GO:0030036 actin cytoskeleton organization; GO:0032501 multicellular organismal process; GO:0032502 developmental process; GO:0048856 anatomical structure developmen…	GO:0005622 intracellular; GO:0005623 cell; GO:0005634 nucleus; GO:0005654 nucleoplasm; GO:0005737 cytoplasm; GO:0005815 microtubule organizing center; GO:0005829 cytosol; GO:0005856 cytoskeleton; GO:0005903 brush border; GO:0005912 adherens junction; GO:0005925 focal adhesion; GO:0015630 microtubule cytoskeleton; GO:0030054 cell junction; GO:0030055 cell-substrate junction; GO:0031974 membrane-en…	GO:0003779 actin binding; GO:0005488 binding; GO:0005515 protein binding; GO:0008092 cytoskeletal protein binding;	PF00626	Gelsolin repeat	Z	KOG0444	Cytoskeletal regulator Flightless-I (contains leucine-rich and gelsolin repeats)
Q8K2I1	Protein farnesyltransferase subunit beta OS=Mus musculus OX=10090 GN=Fntb PE=1 SV=1	Fntb	1.9649	4.41947e-05	Up	48.819	16.9	5	5	0.66018		0.626363	0.860995	0.966538	0.81622	0.815018	0.934924	1.16913	1.29933	1.23373	1.38931	1.22826	cytoplasm	K05954	FNTB; protein farnesyltransferase subunit beta [EC:2.5.1.58]	mmu00900 Terpenoid backbone biosynthesis	GO:0006464 cellular protein modification process; GO:0006807 nitrogen compound metabolic process; GO:0006950 response to stress; GO:0008152 metabolic process; GO:0008284 positive regulation of cell population proliferation; GO:0008285 negative regulation of cell population proliferation; GO:0009611 response to wounding; GO:0009889 regulation of biosynthetic process; GO:0009891 positive regulation…	GO:0005622 intracellular; GO:0005623 cell; GO:0005737 cytoplasm; GO:0005829 cytosol; GO:0005856 cytoskeleton; GO:0005875 microtubule associated complex; GO:0005965 protein farnesyltransferase complex; GO:0015630 microtubule cytoskeleton; GO:0032991 protein-containing complex; GO:0043226 organelle; GO:0043228 non-membrane-bounded organelle; GO:0043229 intracellular organelle; GO:0043232 intracellu…	GO:0003824 catalytic activity; GO:0004311 farnesyltranstransferase activity; GO:0004659 prenyltransferase activity; GO:0004660 protein farnesyltransferase activity; GO:0005488 binding; GO:0008270 zinc ion binding; GO:0008318 protein prenyltransferase activity; GO:0016740 transferase activity; GO:0016765 transferase activity, transferring alkyl or aryl (other than methyl) groups; GO:0043167 ion bi…			O	KOG0365	Beta subunit of farnesyltransferase
Q8BKC5	Importin-5 OS=Mus musculus OX=10090 GN=Ipo5 PE=1 SV=3	Ipo5	1.9648	4.86619e-08	Up	123.59	46.6	35	34	0.707971	0.69545	0.715274	0.778777	0.789211	0.800641	0.781765	0.793053	1.41983	1.44222	1.34414	1.34077	1.3909	cytoplasm	K20222			GO:0001101 response to acid chemical; GO:0006606 protein import into nucleus; GO:0006607 NLS-bearing protein import into nucleus; GO:0006610 ribosomal protein import into nucleus; GO:0006810 transport; GO:0006886 intracellular protein transport; GO:0006913 nucleocytoplasmic transport; GO:0008104 protein localization; GO:0009719 response to endogenous stimulus; GO:0009987 cellular process; GO:0010…	GO:0005622 intracellular; GO:0005623 cell; GO:0005634 nucleus; GO:0005635 nuclear envelope; GO:0005737 cytoplasm; GO:0012505 endomembrane system; GO:0016020 membrane; GO:0031090 organelle membrane; GO:0031965 nuclear membrane; GO:0031967 organelle envelope; GO:0031974 membrane-enclosed lumen; GO:0031975 envelope; GO:0031981 nuclear lumen; GO:0034399 nuclear periphery; GO:0043226 organelle; GO:004…	GO:0005048 signal sequence binding; GO:0005215 transporter activity; GO:0005488 binding; GO:0008139 nuclear localization sequence binding; GO:0033218 amide binding; GO:0042277 peptide binding;			UY	KOG2171	Karyopherin (importin) beta 3
P63028	Translationally-controlled tumor protein OS=Mus musculus OX=10090 GN=Tpt1 PE=1 SV=1	Tpt1	1.9641	6.67732e-08	Up	19.462	33.1	6	6	0.73568	0.739431	0.739431	0.711857	0.677242	0.701854	0.738049	0.707251	1.50117	1.50071	1.43589	1.37969	1.43174	cytoplasm,nucleus				GO:0000003 reproduction; GO:0006810 transport; GO:0006811 ion transport; GO:0006812 cation transport; GO:0006816 calcium ion transport; GO:0006873 cellular ion homeostasis; GO:0006874 cellular calcium ion homeostasis; GO:0006875 cellular metal ion homeostasis; GO:0007276 gamete generation; GO:0007283 spermatogenesis; GO:0008283 cell population proliferation; GO:0009605 response to external stimul…	GO:0005576 extracellular region; GO:0005615 extracellular space; GO:0005622 intracellular; GO:0005623 cell; GO:0005634 nucleus; GO:0005654 nucleoplasm; GO:0005737 cytoplasm; GO:0005768 endosome; GO:0005770 late endosome; GO:0005771 multivesicular body; GO:0005829 cytosol; GO:0012505 endomembrane system; GO:0031410 cytoplasmic vesicle; GO:0031974 membrane-enclosed lumen; GO:0031981 nuclear lumen; …	GO:0005488 binding; GO:0005509 calcium ion binding; GO:0005515 protein binding; GO:0008017 microtubule binding; GO:0008092 cytoskeletal protein binding; GO:0008134 transcription factor binding; GO:0015631 tubulin binding; GO:0043167 ion binding; GO:0043169 cation binding; GO:0046872 metal ion binding;	PF00838	Translationally controlled tumour protein	DZ	KOG1727	Microtubule-binding protein (translationally controlled tumor protein)
Q9ET54	Palladin OS=Mus musculus OX=10090 GN=Palld PE=1 SV=2	Palld	1.9621	4.10056e-07	Up	152.13	23.7	23	23	0.612984	0.604328	0.638379	0.997734	1.01439	1.02589	1.03423	1.00373	1.25696	1.27142	1.19691	1.13792	1.20513	nucleus	K22029			GO:0000003 reproduction; GO:0000902 cell morphogenesis; GO:0000904 cell morphogenesis involved in differentiation; GO:0001666 response to hypoxia; GO:0001701 in utero embryonic development; GO:0001890 placenta development; GO:0001892 embryonic placenta development; GO:0002064 epithelial cell development; GO:0003006 developmental process involved in reproduction; GO:0003334 keratinocyte developmen…	GO:0001725 stress fiber; GO:0001726 ruffle; GO:0002102 podosome; GO:0005622 intracellular; GO:0005623 cell; GO:0005634 nucleus; GO:0005737 cytoplasm; GO:0005829 cytosol; GO:0005856 cytoskeleton; GO:0005884 actin filament; GO:0005886 plasma membrane; GO:0015629 actin cytoskeleton; GO:0016020 membrane; GO:0030175 filopodium; GO:0030424 axon; GO:0030426 growth cone; GO:0030427 site of polarized grow…	GO:0005488 binding; GO:0005515 protein binding; GO:0008092 cytoskeletal protein binding; GO:0042805 actinin binding; GO:0051371 muscle alpha-actinin binding; GO:0051393 alpha-actinin binding;	PF07679	Immunoglobulin I-set domain
Q9JJ80	Ribosome production factor 2 homolog OS=Mus musculus OX=10090 GN=Rpf2 PE=2 SV=2	Rpf2	1.9579	0.00946024	Up	35.363	20.6	5	5		0.50418	0.95681	0.717643	0.571644	0.576734	0.521767		1.46181	1.3784	1.30872	1.5533	1.44899	nucleus	K14847			GO:0000027 ribosomal large subunit assembly; GO:0000463 maturation of LSU-rRNA from tricistronic rRNA transcript (SSU-rRNA, 5.8S rRNA, LSU-rRNA); GO:0000470 maturation of LSU-rRNA; GO:0006139 nucleobase-containing compound metabolic process; GO:0006355 regulation of transcription, DNA-templated; GO:0006357 regulation of transcription by RNA polymerase II; GO:0006364 rRNA processing; GO:0006396 RN…	GO:0005622 intracellular; GO:0005623 cell; GO:0005634 nucleus; GO:0005730 nucleolus; GO:0031974 membrane-enclosed lumen; GO:0031981 nuclear lumen; GO:0043226 organelle; GO:0043227 membrane-bounded organelle; GO:0043228 non-membrane-bounded organelle; GO:0043229 intracellular organelle; GO:0043231 intracellular membrane-bounded organelle; GO:0043232 intracellular non-membrane-bounded organelle; GO…	GO:0000981 DNA-binding transcription factor activity, RNA polymerase II-specific; GO:0003676 nucleic acid binding; GO:0003700 DNA-binding transcription factor activity; GO:0003723 RNA binding; GO:0005488 binding; GO:0008097 5S rRNA binding; GO:0019843 rRNA binding; GO:0097159 organic cyclic compound binding; GO:0140110 transcription regulator activity; GO:1901363 heterocyclic compound binding;	PF04427	Brix domain	J	KOG3031	Protein required for biogenesis of the ribosomal 60S subunit
Q99K41	EMILIN-1 OS=Mus musculus OX=10090 GN=Emilin1 PE=1 SV=1	Emilin1	1.955	6.3619e-09	Up	107.58	39.6	26	26	0.617508	0.597152	0.621084	1.01067	1.04144	1.05174	1.04458	1.03433	1.20322	1.20401	1.16228	1.18955	1.22244	extracellular	K24246			GO:0001932 regulation of protein phosphorylation; GO:0001933 negative regulation of protein phosphorylation; GO:0002682 regulation of immune system process; GO:0002683 negative regulation of immune system process; GO:0002685 regulation of leukocyte migration; GO:0002686 negative regulation of leukocyte migration; GO:0003170 heart valve development; GO:0003176 aortic valve development; GO:0003179 …	GO:0005576 extracellular region; GO:0005615 extracellular space; GO:0005623 cell; GO:0005886 plasma membrane; GO:0005887 integral component of plasma membrane; GO:0008305 integrin complex; GO:0016020 membrane; GO:0016021 integral component of membrane; GO:0031012 extracellular matrix; GO:0031224 intrinsic component of membrane; GO:0031226 intrinsic component of plasma membrane; GO:0032991 protein…	GO:0005102 signaling receptor binding; GO:0005178 integrin binding; GO:0005198 structural molecule activity; GO:0005201 extracellular matrix structural constituent; GO:0005488 binding; GO:0005515 protein binding; GO:0030023 extracellular matrix constituent conferring elasticity; GO:0042802 identical protein binding; GO:0044877 protein-containing complex binding; GO:0050839 cell adhesion molecule …	PF07546; PF00386	EMI domain; C1q domain
P28740	Kinesin-like protein KIF2A OS=Mus musculus OX=10090 GN=Kif2a PE=1 SV=2	Kif2a	1.9482	0.0290828	Up	79.755	11.2	6	6	0.464431		0.724865		1.10543	1.08024	0.755778	1.07686	1.56506	0.943678	0.83649	1.28831	1.15886	nucleus	K10393			GO:0000226 microtubule cytoskeleton organization; GO:0000278 mitotic cell cycle; GO:0000280 nuclear division; GO:0002376 immune system process; GO:0002478 antigen processing and presentation of exogenous peptide antigen; GO:0002495 antigen processing and presentation of peptide antigen via MHC class II; GO:0002504 antigen processing and presentation of peptide or polysaccharide antigen via MHC cl…	GO:0000922 spindle pole; GO:0005622 intracellular; GO:0005623 cell; GO:0005634 nucleus; GO:0005654 nucleoplasm; GO:0005730 nucleolus; GO:0005737 cytoplasm; GO:0005813 centrosome; GO:0005814 centriole; GO:0005815 microtubule organizing center; GO:0005819 spindle; GO:0005829 cytosol; GO:0005856 cytoskeleton; GO:0005871 kinesin complex; GO:0005875 microtubule associated complex; GO:0005929 cilium; G…	GO:0003774 motor activity; GO:0003777 microtubule motor activity; GO:0003824 catalytic activity; GO:0005488 binding; GO:0005515 protein binding; GO:0008017 microtubule binding; GO:0008092 cytoskeletal protein binding; GO:0015631 tubulin binding; GO:0016462 pyrophosphatase activity; GO:0016787 hydrolase activity; GO:0016817 hydrolase activity, acting on acid anhydrides; GO:0016818 hydrolase activi…	PF00225	Kinesin motor domain	Z	KOG0246	Kinesin-like protein
P13597	Intercellular adhesion molecule 1 OS=Mus musculus OX=10090 GN=Icam1 PE=1 SV=1	Icam1	1.9476	4.43638e-09	Up	58.844	18.1	10	10	0.697382	0.698769	0.710712	0.804806	0.793165	0.82272	0.837317	0.796241	1.36117	1.37727	1.36563	1.32721	1.40761	plasma membrane	K06490	ICAM1; intercellular adhesion molecule 1	mmu05416 Viral myocarditis; mmu04064 NF-kappa B signaling pathway; mmu05418 Fluid shear stress and atherosclerosis; mmu05164 Influenza A; mmu05166 Human T-cell leukemia virus 1 infection; mmu05144 Malaria; mmu05323 Rheumatoid arthritis; mmu04933 AGE-RAGE signaling pathway in diabetic complications; mmu04514 Cell adhesion molecules; mmu05167 Kaposi sarcoma-associated herpesvirus infection; mmu0516…	GO:0000003 reproduction; GO:0001505 regulation of neurotransmitter levels; GO:0001678 cellular glucose homeostasis; GO:0001775 cell activation; GO:0001885 endothelial cell development; GO:0001932 regulation of protein phosphorylation; GO:0001934 positive regulation of protein phosphorylation; GO:0002064 epithelial cell development; GO:0002250 adaptive immune response; GO:0002252 immune effector p…	GO:0001772 immunological synapse; GO:0005576 extracellular region; GO:0005615 extracellular space; GO:0005623 cell; GO:0005886 plasma membrane; GO:0005887 integral component of plasma membrane; GO:0009897 external side of plasma membrane; GO:0009986 cell surface; GO:0016020 membrane; GO:0016021 integral component of membrane; GO:0031224 intrinsic component of membrane; GO:0031226 intrinsic compon…	GO:0005102 signaling receptor binding; GO:0005178 integrin binding; GO:0005488 binding; GO:0005515 protein binding; GO:0044877 protein-containing complex binding; GO:0050839 cell adhesion molecule binding;	PF03921; PF13895	Intercellular adhesion molecule (ICAM), N-terminal domain; Immunoglobulin domain
Q05860	Formin-1 OS=Mus musculus OX=10090 GN=Fmn1 PE=1 SV=2	Fmn1	1.9417	0.00522242	Up	163.58	5.1	6	6	0.883465		0.602338	0.594046	0.646139	0.597388	0.849843	0.614174	1.66114	1.18557	1.59469	1.35719	1.41401	cytoplasm,nucleus	K10367			GO:0000902 cell morphogenesis; GO:0000904 cell morphogenesis involved in differentiation; GO:0001501 skeletal system development; GO:0001655 urogenital system development; GO:0001656 metanephros development; GO:0001657 ureteric bud development; GO:0001822 kidney development; GO:0001823 mesonephros development; GO:0001952 regulation of cell-matrix adhesion; GO:0001954 positive regulation of cell-m…	GO:0005622 intracellular; GO:0005623 cell; GO:0005634 nucleus; GO:0005737 cytoplasm; GO:0005856 cytoskeleton; GO:0005886 plasma membrane; GO:0005912 adherens junction; GO:0015630 microtubule cytoskeleton; GO:0016020 membrane; GO:0030054 cell junction; GO:0043226 organelle; GO:0043227 membrane-bounded organelle; GO:0043228 non-membrane-bounded organelle; GO:0043229 intracellular organelle; GO:0043…	GO:0005488 binding; GO:0005515 protein binding; GO:0008017 microtubule binding; GO:0008092 cytoskeletal protein binding; GO:0015631 tubulin binding; GO:0017124 SH3 domain binding; GO:0019904 protein domain specific binding;			Z	KOG1922	Rho GTPase effector BNI1 and related formins
Q99LC8	Translation initiation factor eIF-2B subunit alpha OS=Mus musculus OX=10090 GN=Eif2b1 PE=1 SV=1	Eif2b1	1.9406	0.00456226	Up	33.816	20	4	4	0.748372	0.692121	0.388168	1.0342	1.03502	1.04194	1.05788	1.08765	1.17901	1.15564	1.06646	1.34243	1.17111	cytoplasm	K03239	EIF2B1; translation initiation factor eIF-2B subunit alpha	mmu05168 Herpes simplex virus 1 infection; mmu03013 RNA transport	GO:0002253 activation of immune response; GO:0002376 immune system process; GO:0002429 immune response-activating cell surface receptor signaling pathway; GO:0002682 regulation of immune system process; GO:0002684 positive regulation of immune system process; GO:0002757 immune response-activating signal transduction; GO:0002764 immune response-regulating signaling pathway; GO:0002768 immune respo…	GO:0005622 intracellular; GO:0005623 cell; GO:0005737 cytoplasm; GO:0005829 cytosol; GO:0005850 eukaryotic translation initiation factor 2 complex; GO:0005851 eukaryotic translation initiation factor 2B complex; GO:0005886 plasma membrane; GO:0016020 membrane; GO:0032991 protein-containing complex; GO:0071944 cell periphery;	GO:0000166 nucleotide binding; GO:0001882 nucleoside binding; GO:0001883 purine nucleoside binding; GO:0003676 nucleic acid binding; GO:0003723 RNA binding; GO:0003743 translation initiation factor activity; GO:0005488 binding; GO:0005515 protein binding; GO:0005525 GTP binding; GO:0008135 translation factor activity, RNA binding; GO:0017076 purine nucleotide binding; GO:0019001 guanyl nucleotide…			J	KOG1466	Translation initiation factor 2B, alpha subunit (eIF-2Balpha/GCN3)
Q9QXS6	Drebrin OS=Mus musculus OX=10090 GN=Dbn1 PE=1 SV=4	Dbn1	1.9382	1.00346e-07	Up	77.286	32.3	15	15	0.717358	0.684668	0.679634	0.85636	0.844523	0.842587	0.815981	0.834511	1.38532	1.36104	1.34046	1.27608	1.36148	nucleus				GO:0000003 reproduction; GO:0001558 regulation of cell growth; GO:0001964 startle response; GO:0003008 system process; GO:0006937 regulation of muscle contraction; GO:0006996 organelle organization; GO:0007010 cytoskeleton organization; GO:0007015 actin filament organization; GO:0007154 cell communication; GO:0007275 multicellular organism development; GO:0007276 gamete generation; GO:0007283 spe…	GO:0005622 intracellular; GO:0005623 cell; GO:0005737 cytoplasm; GO:0005856 cytoskeleton; GO:0005886 plasma membrane; GO:0005911 cell-cell junction; GO:0005921 gap junction; GO:0014069 postsynaptic density; GO:0015629 actin cytoskeleton; GO:0016020 membrane; GO:0030027 lamellipodium; GO:0030054 cell junction; GO:0030175 filopodium; GO:0030424 axon; GO:0030425 dendrite; GO:0030426 growth cone; GO:…	GO:0003779 actin binding; GO:0005488 binding; GO:0005515 protein binding; GO:0005522 profilin binding; GO:0008092 cytoskeletal protein binding; GO:0044877 protein-containing complex binding; GO:0051015 actin filament binding;	PF00241	Cofilin/tropomyosin-type actin-binding protein	Z	KOG3655	Drebrins and related actin binding proteins
Q9Z2D8	Methyl-CpG-binding domain protein 3 OS=Mus musculus OX=10090 GN=Mbd3 PE=1 SV=1	Mbd3	1.9363	7.22426e-06	Up	32.168	15.1	3	3	0.643789	0.610562	0.57875	1.06076	1.07324	0.986993	1.01095	1.11919	1.23991	1.20282	1.15063	1.06438	1.25804	cytoplasm	K11591			GO:0000122 negative regulation of transcription by RNA polymerase II; GO:0001701 in utero embryonic development; GO:0006139 nucleobase-containing compound metabolic process; GO:0006259 DNA metabolic process; GO:0006325 chromatin organization; GO:0006342 chromatin silencing; GO:0006346 DNA methylation-dependent heterochromatin assembly; GO:0006355 regulation of transcription, DNA-templated; GO:000…	GO:0000118 histone deacetylase complex; GO:0000228 nuclear chromosome; GO:0000785 chromatin; GO:0000790 nuclear chromatin; GO:0000792 heterochromatin; GO:0005622 intracellular; GO:0005623 cell; GO:0005634 nucleus; GO:0005654 nucleoplasm; GO:0005694 chromosome; GO:0005737 cytoplasm; GO:0016581 NuRD complex; GO:0017053 transcription repressor complex; GO:0031974 membrane-enclosed lumen; GO:0031981 …	GO:0000166 nucleotide binding; GO:0003676 nucleic acid binding; GO:0003677 DNA binding; GO:0003682 chromatin binding; GO:0003824 catalytic activity; GO:0004407 histone deacetylase activity; GO:0005488 binding; GO:0008327 methyl-CpG binding; GO:0016787 hydrolase activity; GO:0016810 hydrolase activity, acting on carbon-nitrogen (but not peptide) bonds; GO:0016811 hydrolase activity, acting on carb…	PF01429	Methyl-CpG binding domain	BK	KOG4161	Methyl-CpG binding transcription regulators
Q6P5E6	ADP-ribosylation factor-binding protein GGA2 OS=Mus musculus OX=10090 GN=Gga2 PE=1 SV=1	Gga2	1.9359	9.44593e-07	Up	66.048	42	16	15	0.765193	0.689329	0.768882	0.700057	0.705078	0.757966	0.670214	0.769484	1.49011	1.43462	1.37199	1.40722	1.46986	cytoplasm	K12404	GGA; ADP-ribosylation factor-binding protein GGA	mmu04142 Lysosome	GO:0006807 nitrogen compound metabolic process; GO:0006810 transport; GO:0006886 intracellular protein transport; GO:0008104 protein localization; GO:0008152 metabolic process; GO:0009987 cellular process; GO:0015031 protein transport; GO:0015833 peptide transport; GO:0019538 protein metabolic process; GO:0033036 macromolecule localization; GO:0034613 cellular protein localization; GO:0042886 ami…	GO:0005622 intracellular; GO:0005623 cell; GO:0005737 cytoplasm; GO:0005768 endosome; GO:0005769 early endosome; GO:0005794 Golgi apparatus; GO:0005802 trans-Golgi network; GO:0010008 endosome membrane; GO:0012505 endomembrane system; GO:0016020 membrane; GO:0030135 coated vesicle; GO:0030136 clathrin-coated vesicle; GO:0031090 organelle membrane; GO:0031410 cytoplasmic vesicle; GO:0031901 early …	GO:0005488 binding; GO:0005515 protein binding; GO:0019899 enzyme binding; GO:0030306 ADP-ribosylation factor binding; GO:0031267 small GTPase binding; GO:0051020 GTPase binding;	PF00790; PF03127; PF02883	VHS domain; GAT domain; Adaptin C-terminal domain	U	KOG1086	Cytosolic sorting protein/ADP-ribosylation factor effector GGA
Q6PD19	Armadillo-like helical domain-containing protein 3 OS=Mus musculus OX=10090 GN=Armh3 PE=1 SV=2	Armh3	1.9359	0.019789	Up	78.631	17	7	7	0.469341	0.648092	0.87215	0.972301	0.708629	0.935139	0.966906	1.0081	1.21401	1.87731	1.03654	1.37018	0.921299	plasma membrane							PF08427	Domain of unknown function (DUF1741)	S	KOG4654	Uncharacterized conserved protein
P50543	Protein S100-A11 OS=Mus musculus OX=10090 GN=S100a11 PE=1 SV=1	S100a11	1.9353	8.26224e-07	Up	11.083	33.7	3	3	0.698817	0.718533	0.673874	0.630473	0.910415	0.863096	0.919793	0.839606	1.418	1.41437	1.30009	1.27484	1.3381	cytoplasm	K23765			GO:0001775 cell activation; GO:0002252 immune effector process; GO:0002263 cell activation involved in immune response; GO:0002274 myeloid leukocyte activation; GO:0002275 myeloid cell activation involved in immune response; GO:0002283 neutrophil activation involved in immune response; GO:0002366 leukocyte activation involved in immune response; GO:0002376 immune system process; GO:0002443 leukoc…	GO:0001726 ruffle; GO:0005622 intracellular; GO:0005623 cell; GO:0005634 nucleus; GO:0005737 cytoplasm; GO:0012505 endomembrane system; GO:0030141 secretory granule; GO:0031252 cell leading edge; GO:0031410 cytoplasmic vesicle; GO:0031974 membrane-enclosed lumen; GO:0031982 vesicle; GO:0031983 vesicle lumen; GO:0034774 secretory granule lumen; GO:0042995 cell projection; GO:0043226 organelle; GO:…	GO:0005488 binding; GO:0005515 protein binding; GO:0042802 identical protein binding; GO:0042803 protein homodimerization activity; GO:0044548 S100 protein binding; GO:0046983 protein dimerization activity; GO:0048306 calcium-dependent protein binding;	PF01023; PF00036	S-100/ICaBP type calcium binding domain; EF hand
Q62426	Cystatin-B OS=Mus musculus OX=10090 GN=Cstb PE=1 SV=1	Cstb	1.9331	1.04449e-07	Up	11.045	55.1	4	4	0.736173	0.739203	0.700112	0.75683	0.743648	0.762133	0.799002	0.754002	1.34845	1.41043	1.44881	1.43522	1.36598	cytoplasm	K13907			GO:0007610 behavior; GO:0007626 locomotory behavior; GO:0008344 adult locomotory behavior; GO:0009892 negative regulation of metabolic process; GO:0010466 negative regulation of peptidase activity; GO:0010605 negative regulation of macromolecule metabolic process; GO:0010951 negative regulation of endopeptidase activity; GO:0019222 regulation of metabolic process; GO:0030162 regulation of proteol…	GO:0005576 extracellular region; GO:0005615 extracellular space; GO:0005622 intracellular; GO:0005623 cell; GO:0005634 nucleus; GO:0005730 nucleolus; GO:0005737 cytoplasm; GO:0005829 cytosol; GO:0031974 membrane-enclosed lumen; GO:0031981 nuclear lumen; GO:0043226 organelle; GO:0043227 membrane-bounded organelle; GO:0043228 non-membrane-bounded organelle; GO:0043229 intracellular organelle; GO:00…	GO:0002020 protease binding; GO:0004857 enzyme inhibitor activity; GO:0004866 endopeptidase inhibitor activity; GO:0004869 cysteine-type endopeptidase inhibitor activity; GO:0005488 binding; GO:0005515 protein binding; GO:0019899 enzyme binding; GO:0030234 enzyme regulator activity; GO:0030414 peptidase inhibitor activity; GO:0061134 peptidase regulator activity; GO:0061135 endopeptidase regulato…	PF00031	Cystatin domain
Q3TLH4	Protein PRRC2C OS=Mus musculus OX=10090 GN=Prrc2c PE=1 SV=3	Prrc2c	1.9217	3.11739e-06	Up	310.89	10.3	17	17	0.735957	0.678917	0.630151	0.868906	0.98999	0.869532	0.807042	0.869764	1.28153	1.25521	1.30648	1.32024	1.38628	nucleus				GO:0002244 hematopoietic progenitor cell differentiation; GO:0002376 immune system process; GO:0002520 immune system development; GO:0007275 multicellular organism development; GO:0009987 cellular process; GO:0030097 hemopoiesis; GO:0030154 cell differentiation; GO:0032501 multicellular organismal process; GO:0032502 developmental process; GO:0048513 animal organ development; GO:0048534 hematopoi…	GO:0005622 intracellular; GO:0005623 cell; GO:0005737 cytoplasm; GO:0005829 cytosol;	GO:0005488 binding; GO:0005515 protein binding; GO:0008022 protein C-terminus binding;			JKL	KOG4817	Unnamed protein
Q9R111	Guanine deaminase OS=Mus musculus OX=10090 GN=Gda PE=1 SV=1	Gda	1.9176	1.99548e-08	Up	51.012	52	17	17	0.690797	0.667148	0.702403	0.866032	0.882625	0.868003	0.917207	0.821051	1.35593	1.32455	1.29564	1.32422	1.28439	mitochondria	K01487	E3.5.4.3; guanine deaminase [EC:3.5.4.3]	mmu01100 Metabolic pathways; mmu00230 Purine metabolism	GO:0006139 nucleobase-containing compound metabolic process; GO:0006144 purine nucleobase metabolic process; GO:0006163 purine nucleotide metabolic process; GO:0006195 purine nucleotide catabolic process; GO:0006725 cellular aromatic compound metabolic process; GO:0006753 nucleoside phosphate metabolic process; GO:0006793 phosphorus metabolic process; GO:0006796 phosphate-containing compound meta…	GO:0005622 intracellular; GO:0005623 cell; GO:0005737 cytoplasm; GO:0005829 cytosol;	GO:0003824 catalytic activity; GO:0005488 binding; GO:0008270 zinc ion binding; GO:0008892 guanine deaminase activity; GO:0016787 hydrolase activity; GO:0016810 hydrolase activity, acting on carbon-nitrogen (but not peptide) bonds; GO:0016814 hydrolase activity, acting on carbon-nitrogen (but not peptide) bonds, in cyclic amidines; GO:0019239 deaminase activity; GO:0043167 ion binding; GO:0043169…	PF01979	Amidohydrolase family	FQ	KOG3968	Atrazine chlorohydrolase/guanine deaminase
Q8BX57	PX domain-containing protein kinase-like protein OS=Mus musculus OX=10090 GN=Pxk PE=1 SV=2	Pxk	1.9144	8.54695e-07	Up	65.23	30.1	11	11	0.671811	0.721085	0.755542	0.694417	0.77583	0.71805	0.844555	0.963629	1.34016	1.409	1.36986	1.4205	1.31557	nucleus	K17543			GO:0006950 response to stress; GO:0006952 defense response; GO:0006954 inflammatory response; GO:0010646 regulation of cell communication; GO:0023051 regulation of signaling; GO:0032780 negative regulation of ATPase activity; GO:0032879 regulation of localization; GO:0043086 negative regulation of catalytic activity; GO:0043269 regulation of ion transport; GO:0043271 negative regulation of ion tr…	GO:0005622 intracellular; GO:0005623 cell; GO:0005634 nucleus; GO:0005737 cytoplasm; GO:0005815 microtubule organizing center; GO:0005829 cytosol; GO:0005856 cytoskeleton; GO:0005886 plasma membrane; GO:0015630 microtubule cytoskeleton; GO:0016020 membrane; GO:0032991 protein-containing complex; GO:0043226 organelle; GO:0043227 membrane-bounded organelle; GO:0043228 non-membrane-bounded organelle…	GO:0005488 binding; GO:0005515 protein binding; GO:0005543 phospholipid binding; GO:0008022 protein C-terminus binding; GO:0008289 lipid binding; GO:0035091 phosphatidylinositol binding; GO:0043167 ion binding; GO:0043168 anion binding;	PF00787; PF00069	PX domain; Protein kinase domain	T	KOG2101	Intermediate filament-like protein, sorting nexins, and related proteins containing PX (PhoX) domain(s)
Q8K209	Adhesion G-protein coupled receptor G1 OS=Mus musculus OX=10090 GN=Adgrg1 PE=1 SV=1	Adgrg1	1.9084	0.000642264	Up	77.254	12.2	6	6	0.541751	0.73399	0.853178	0.846462	0.838266	0.801033	0.808772	0.805264	1.37253	1.32944	1.27396	1.33152	1.46383	plasma membrane	K08450			GO:0000003 reproduction; GO:0001525 angiogenesis; GO:0001568 blood vessel development; GO:0001816 cytokine production; GO:0001944 vasculature development; GO:0003002 regionalization; GO:0003006 developmental process involved in reproduction; GO:0006928 movement of cell or subcellular component; GO:0007154 cell communication; GO:0007155 cell adhesion; GO:0007165 signal transduction; GO:0007186 G p…	GO:0005623 cell; GO:0005886 plasma membrane; GO:0005887 integral component of plasma membrane; GO:0016020 membrane; GO:0016021 integral component of membrane; GO:0031224 intrinsic component of membrane; GO:0031226 intrinsic component of plasma membrane; GO:0042995 cell projection; GO:0071944 cell periphery; GO:0097386 glial cell projection; GO:0097449 astrocyte projection; GO:0097450 astrocyte en…	GO:0004888 transmembrane signaling receptor activity; GO:0004930 G protein-coupled receptor activity; GO:0005488 binding; GO:0005518 collagen binding; GO:0005539 glycosaminoglycan binding; GO:0008201 heparin binding; GO:0038023 signaling receptor activity; GO:0043167 ion binding; GO:0043168 anion binding; GO:0044877 protein-containing complex binding; GO:0050840 extracellular matrix binding; GO:0…			T	KOG4193	G protein-coupled receptors
Q61599	Rho GDP-dissociation inhibitor 2 OS=Mus musculus OX=10090 GN=Arhgdib PE=1 SV=3	Arhgdib	1.8985	1.24011e-07	Up	22.851	66	8	8	0.570292	0.574939	0.602626	1.11782	1.1419	1.14539	1.16694	1.14967	1.11582	1.13148	1.09196	1.05348	1.13768	cytoplasm	K12462	ARHGDI; Rho GDP-dissociation inhibitor	mmu04962 Vasopressin-regulated water reabsorption; mmu04722 Neurotrophin signaling pathway	GO:0007162 negative regulation of cell adhesion; GO:0007275 multicellular organism development; GO:0009966 regulation of signal transduction; GO:0010646 regulation of cell communication; GO:0023051 regulation of signaling; GO:0030155 regulation of cell adhesion; GO:0030334 regulation of cell migration; GO:0030336 negative regulation of cell migration; GO:0032501 multicellular organismal process; …	GO:0005622 intracellular; GO:0005623 cell; GO:0005737 cytoplasm; GO:0005829 cytosol; GO:0005856 cytoskeleton; GO:0016020 membrane; GO:0031410 cytoplasmic vesicle; GO:0031982 vesicle; GO:0043226 organelle; GO:0043227 membrane-bounded organelle; GO:0043228 non-membrane-bounded organelle; GO:0043229 intracellular organelle; GO:0043232 intracellular non-membrane-bounded organelle; GO:0097708 intracel…	GO:0003824 catalytic activity; GO:0003924 GTPase activity; GO:0005092 GDP-dissociation inhibitor activity; GO:0005094 Rho GDP-dissociation inhibitor activity; GO:0005488 binding; GO:0005515 protein binding; GO:0016462 pyrophosphatase activity; GO:0016787 hydrolase activity; GO:0016817 hydrolase activity, acting on acid anhydrides; GO:0016818 hydrolase activity, acting on acid anhydrides, in phosp…	PF02115	RHO protein GDP dissociation inhibitor	T	KOG3205	Rho GDP-dissociation inhibitor
E9Q5C9	Nucleolar and coiled-body phosphoprotein 1 OS=Mus musculus OX=10090 GN=Nolc1 PE=1 SV=1	Nolc1	1.8957	2.4232e-05	Up	73.697	9.8	6	6	0.794277	0.749662	0.621488	0.912697	0.821335	0.724916	0.685322	0.848574	1.35917	1.38489	1.40758	1.35211	1.33797	nucleus				GO:0000278 mitotic cell cycle; GO:0001837 epithelial to mesenchymal transition; GO:0006139 nucleobase-containing compound metabolic process; GO:0006355 regulation of transcription, DNA-templated; GO:0006364 rRNA processing; GO:0006396 RNA processing; GO:0006417 regulation of translation; GO:0006725 cellular aromatic compound metabolic process; GO:0006807 nitrogen compound metabolic process; GO:00…	GO:0001650 fibrillar center; GO:0005622 intracellular; GO:0005623 cell; GO:0005634 nucleus; GO:0005654 nucleoplasm; GO:0005730 nucleolus; GO:0005732 small nucleolar ribonucleoprotein complex; GO:0005737 cytoplasm; GO:0015030 Cajal body; GO:0016604 nuclear body; GO:0030532 small nuclear ribonucleoprotein complex; GO:0031428 box C/D snoRNP complex; GO:0031429 box H/ACA snoRNP complex; GO:0031974 me…	GO:0001042 RNA polymerase I core binding; GO:0003676 nucleic acid binding; GO:0003700 DNA-binding transcription factor activity; GO:0003723 RNA binding; GO:0005048 signal sequence binding; GO:0005488 binding; GO:0005515 protein binding; GO:0008134 transcription factor binding; GO:0008139 nuclear localization sequence binding; GO:0019899 enzyme binding; GO:0019904 protein domain specific binding; …	PF05022	SRP40, C-terminal domain	Y	KOG2992	Nucleolar GTPase/ATPase p130
Q9CXF4	TBC1 domain family member 15 OS=Mus musculus OX=10090 GN=Tbc1d15 PE=1 SV=1	Tbc1d15	1.8932	3.5553e-06	Up	76.526	28	14	14	0.762467	0.728389	0.711195	0.813892	0.794168	0.790579	0.693694	0.757249	1.41354	1.25204	1.45788	1.44405	1.38085	cytoplasm	K20168	TBC1D15; TBC1 domain family member 15	mmu04137 Mitophagy - animal	GO:0006810 transport; GO:0006886 intracellular protein transport; GO:0008104 protein localization; GO:0015031 protein transport; GO:0015833 peptide transport; GO:0031338 regulation of vesicle fusion; GO:0032879 regulation of localization; GO:0033036 macromolecule localization; GO:0033043 regulation of organelle organization; GO:0034613 cellular protein localization; GO:0042886 amide transport; GO…	GO:0005576 extracellular region; GO:0005622 intracellular; GO:0005623 cell; GO:0005737 cytoplasm; GO:0012505 endomembrane system;	GO:0005096 GTPase activator activity; GO:0005488 binding; GO:0005515 protein binding; GO:0008047 enzyme activator activity; GO:0017016 Ras GTPase binding; GO:0017137 Rab GTPase binding; GO:0019899 enzyme binding; GO:0030234 enzyme regulator activity; GO:0030695 GTPase regulator activity; GO:0031267 small GTPase binding; GO:0051020 GTPase binding; GO:0060589 nucleoside-triphosphatase regulator act…	PF12068	Domain of unknown function (DUF3548)	T	KOG2197	Ypt/Rab-specific GTPase-activating protein GYP7 and related proteins
Q9QY23	Plakophilin-3 OS=Mus musculus OX=10090 GN=Pkp3 PE=1 SV=2	Pkp3	1.8921	0.000545451	Up	87.331	5.3	4	4	0.71314	0.832597	0.668122	0.6858	0.8417	0.851207	0.614157	0.811688	1.6871	1.42106	1.25873	1.43557	1.17913	cytoplasm				GO:0002159 desmosome assembly; GO:0002934 desmosome organization; GO:0007043 cell-cell junction assembly; GO:0007275 multicellular organism development; GO:0008104 protein localization; GO:0008219 cell death; GO:0008544 epidermis development; GO:0009888 tissue development; GO:0009892 negative regulation of metabolic process; GO:0009893 positive regulation of metabolic process; GO:0009894 regulati…	GO:0001533 cornified envelope; GO:0005622 intracellular; GO:0005623 cell; GO:0005634 nucleus; GO:0005654 nucleoplasm; GO:0005886 plasma membrane; GO:0005911 cell-cell junction; GO:0005912 adherens junction; GO:0005914 spot adherens junction; GO:0016020 membrane; GO:0030054 cell junction; GO:0030057 desmosome; GO:0031974 membrane-enclosed lumen; GO:0031981 nuclear lumen; GO:0032991 protein-contain…	GO:0005488 binding; GO:0005515 protein binding; GO:0019899 enzyme binding; GO:0045294 alpha-catenin binding; GO:0050839 cell adhesion molecule binding;			TW	KOG1048	Neural adherens junction protein Plakophilin and related Armadillo repeat proteins
Q9JKB3	Y-box-binding protein 3 OS=Mus musculus OX=10090 GN=Ybx3 PE=1 SV=2	Ybx3	1.8911	0.000548133	Up	38.813	44	9	4	0.839227	0.633713		0.630401	0.669591		0.572955	0.690504	1.4397	1.32403	1.3842	1.4811	1.33458	nucleus	K06099	CSDA; cold shock domain protein A	mmu04530 Tight junction	GO:0000003 reproduction; GO:0000122 negative regulation of transcription by RNA polymerase II; GO:0001701 in utero embryonic development; GO:0003006 developmental process involved in reproduction; GO:0006355 regulation of transcription, DNA-templated; GO:0006357 regulation of transcription by RNA polymerase II; GO:0006417 regulation of translation; GO:0006950 response to stress; GO:0006970 respon…	GO:0005622 intracellular; GO:0005623 cell; GO:0005634 nucleus; GO:0005737 cytoplasm; GO:0005829 cytosol; GO:0005911 cell-cell junction; GO:0005921 gap junction; GO:0005923 bicellular tight junction; GO:0030054 cell junction; GO:0043226 organelle; GO:0043227 membrane-bounded organelle; GO:0043229 intracellular organelle; GO:0043231 intracellular membrane-bounded organelle; GO:0043296 apical juncti…	GO:0000976 transcription regulatory region sequence-specific DNA binding; GO:0000977 RNA polymerase II transcription regulatory region sequence-specific DNA binding; GO:0000981 DNA-binding transcription factor activity, RNA polymerase II-specific; GO:0001067 regulatory region nucleic acid binding; GO:0001227 DNA-binding transcription repressor activity, RNA polymerase II-specific; GO:0003676 nucl…	PF00313	'Cold-shock' DNA-binding domain	K	KOG3070	Predicted RNA-binding protein containing PIN domain and invovled in translation or RNA processing
Q8C650	Septin-10 OS=Mus musculus OX=10090 GN=Septin10 PE=1 SV=1	Septin10	1.888	0.000155507	Up	52.422	30.5	8	7	0.554353	0.654898	0.788234	0.949573	0.855834	0.932479	0.973785	1.00543	1.26231	1.24819	1.19104	1.29081	1.29307	cytoplasm	K16940						PF00735	Septin	Z	KOG3859	Septins (P-loop GTPases)
Q9CR60	Vesicle transport protein GOT1B OS=Mus musculus OX=10090 GN=Golt1b PE=1 SV=1	Golt1b	1.8874	5.96303e-06	Up	15.421	10.9	2	2	0.680358	0.66187	0.683513	0.803599	0.936072	0.924979	0.93739		1.34837	1.39677	1.21359	1.21293	1.20055	plasma membrane					GO:0005622 intracellular; GO:0005623 cell; GO:0005737 cytoplasm; GO:0005783 endoplasmic reticulum; GO:0012505 endomembrane system; GO:0043226 organelle; GO:0043227 membrane-bounded organelle; GO:0043229 intracellular organelle; GO:0043231 intracellular membrane-bounded organelle;				U	KOG1743	Ferric reductase-like proteins
Q99LJ6	Glutathione peroxidase 7 OS=Mus musculus OX=10090 GN=Gpx7 PE=1 SV=1	Gpx7	1.8872	0.000134395	Up	21.061	12.9	2	2	0.673361	0.671759	0.601314	1.00325	0.999236	0.947732	1.00472	0.976559	1.14485	1.13739	1.41463	1.33609	1.08911	extracellular	K00432	gpx; glutathione peroxidase [EC:1.11.1.9]	mmu04918 Thyroid hormone synthesis; mmu00480 Glutathione metabolism; mmu05022 Pathways of neurodegeneration - multiple diseases; mmu05016 Huntington disease; mmu01100 Metabolic pathways; mmu05014 Amyotrophic lateral sclerosis; mmu00590 Arachidonic acid metabolism	GO:0006950 response to stress; GO:0006979 response to oxidative stress; GO:0008152 metabolic process; GO:0009636 response to toxic substance; GO:0009987 cellular process; GO:0033554 cellular response to stress; GO:0034599 cellular response to oxidative stress; GO:0042221 response to chemical; GO:0050896 response to stimulus; GO:0051716 cellular response to stimulus; GO:0055114 oxidation-reduction…	GO:0005622 intracellular; GO:0005623 cell; GO:0005737 cytoplasm; GO:0005783 endoplasmic reticulum; GO:0005788 endoplasmic reticulum lumen; GO:0012505 endomembrane system; GO:0031974 membrane-enclosed lumen; GO:0043226 organelle; GO:0043227 membrane-bounded organelle; GO:0043229 intracellular organelle; GO:0043231 intracellular membrane-bounded organelle; GO:0043233 organelle lumen; GO:0070013 int…	GO:0003824 catalytic activity; GO:0004096 catalase activity; GO:0004601 peroxidase activity; GO:0016209 antioxidant activity; GO:0016491 oxidoreductase activity; GO:0016684 oxidoreductase activity, acting on peroxide as acceptor;			O	KOG1651	Glutathione peroxidase
Q62193	Replication protein A 32 kDa subunit OS=Mus musculus OX=10090 GN=Rpa2 PE=1 SV=1	Rpa2	1.8857	0.00138757	Up	29.718	24.8	4	4	0.474923	0.752882	0.734547	0.996362	0.889018	0.981772	0.989511	1.01356	1.15117	1.19582	1.35221	1.29576	1.17247	cytoplasm,nucleus	K10739	RFA2; replication factor A2	mmu03430 Mismatch repair; mmu03030 DNA replication; mmu03440 Homologous recombination; mmu03420 Nucleotide excision repair; mmu03460 Fanconi anemia pathway	GO:0000018 regulation of DNA recombination; GO:0000075 cell cycle checkpoint; GO:0000077 DNA damage checkpoint; GO:0000082 G1/S transition of mitotic cell cycle; GO:0000278 mitotic cell cycle; GO:0000723 telomere maintenance; GO:0000724 double-strand break repair via homologous recombination; GO:0000725 recombinational repair; GO:0000731 DNA synthesis involved in DNA repair; GO:0006139 nucleobase…	GO:0000228 nuclear chromosome; GO:0000785 chromatin; GO:0005622 intracellular; GO:0005623 cell; GO:0005634 nucleus; GO:0005654 nucleoplasm; GO:0005657 replication fork; GO:0005662 DNA replication factor A complex; GO:0005694 chromosome; GO:0016604 nuclear body; GO:0016605 PML body; GO:0030894 replisome; GO:0031974 membrane-enclosed lumen; GO:0031981 nuclear lumen; GO:0032991 protein-containing co…	GO:0003676 nucleic acid binding; GO:0003677 DNA binding; GO:0003684 damaged DNA binding; GO:0003697 single-stranded DNA binding; GO:0005488 binding; GO:0005515 protein binding; GO:0019899 enzyme binding; GO:0019902 phosphatase binding; GO:0019903 protein phosphatase binding; GO:0031625 ubiquitin protein ligase binding; GO:0042162 telomeric DNA binding; GO:0043047 single-stranded telomeric DNA bin…	PF08784	Replication protein A C terminal	L	KOG3108	Single-stranded DNA-binding replication protein A (RPA), medium (30 kD) subunit
[truncated: 701 more rows]
